# Supplementary material for: Diagnosing Mild Cognitive Impairment (MCI) in clinical trials: a systematic review
Source: PubMed Central journal article supplement — BMJ Open. 2013 Feb 2;3(2):e001909. doi: 10.1136/bmjopen-2012-001909 (PMC3586181; doi:10.1136/bmjopen-2012-001909), 2013-02-02
Supplement: bmjopen-2012-001909.draft_revisions.pdf [file bmjopen-2012-001909.draft_revisions.pdf]

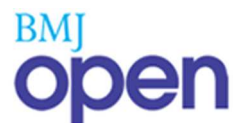

## Diagnosing Mild Cognitive Impairment (MCI) in Clinical Trials: A Systematic Review

|                                 |                                                                                                                                                                                                                                                                                                                                                                                                                                                   |
|---------------------------------|---------------------------------------------------------------------------------------------------------------------------------------------------------------------------------------------------------------------------------------------------------------------------------------------------------------------------------------------------------------------------------------------------------------------------------------------------|
| Journal:                        | <i>BMJ Open</i>                                                                                                                                                                                                                                                                                                                                                                                                                                   |
| Manuscript ID:                  | bmjopen-2012-001909                                                                                                                                                                                                                                                                                                                                                                                                                               |
| Article Type:                   | Research                                                                                                                                                                                                                                                                                                                                                                                                                                          |
| Date Submitted by the Author:   | 15-Aug-2012                                                                                                                                                                                                                                                                                                                                                                                                                                       |
| Complete List of Authors:       | Stephan, Blossom; Newcastle University, Institute of Health and Society<br>Minett, Thais; Cambridge University, Department of Public Health and Primary Care<br>Pagett, Emma; Cambridge University, Department of Public Health and Primary Care<br>Siervo, Mario; Newcastle University, Institute of Ageing<br>Brayne, Carol; University of Cambridge, Public Health and Primary Care<br>McKeith, Ian; Newcastle University, Institute of Ageing |
| <b>Primary Subject Heading</b>: | Neurology                                                                                                                                                                                                                                                                                                                                                                                                                                         |
| Secondary Subject Heading:      | Neurology, Geriatric medicine                                                                                                                                                                                                                                                                                                                                                                                                                     |
| Keywords:                       | Dementia < NEUROLOGY, MENTAL HEALTH, NEUROLOGY                                                                                                                                                                                                                                                                                                                                                                                                    |
|                                 |                                                                                                                                                                                                                                                                                                                                                                                                                                                   |

SCHOLARONE™  
Manuscripts

## Diagnosing Mild Cognitive Impairment (MCI) in Clinical Trials: A Systematic Review

Blossom Christa Maree Stephan<sup>1\*</sup>, Thais Minett<sup>2</sup>, Emma Pagett<sup>2</sup>, Mario Siervo<sup>3</sup>, Carol Brayne<sup>2</sup> & Ian McKeith<sup>3</sup>

1. Institute of Health and Society, Newcastle University, UK
2. Department of Public Health and Primary Care, Cambridge University, UK
3. Institute of Ageing, Newcastle University, UK

**\*Corresponding Author:**

**Blossom Christa Maree Stephan**

Institute of Health and Society

Newcastle University

The Baddiley-Clark Building

Richardson Road

Newcastle upon Tyne

NE2 4AX

United Kingdom

Ph + 44 (0)191 222 3811

### Article Type Systematic Review

**Word Count** 2,724 (Excluding the Abstract and References)

**Summary** 98

**References** 65

**Figures** 2

**Supplementary Material** 2 Tables

**Keywords** Mild Cognitive Impairment (MCI), Randomised Controlled Trials, Operationalisation, Systematic Review

**ABSTRACT**

**Objective** To describe how criteria for amnesic Mild Cognitive Impairment (MCI) have been operationalised in randomised controlled clinical trials (RCTs).

**Design** Systematic review

**Information Sources** EMBASE, PubMed and PSYCHInfo were searched from their inception to February 2012. Electronic clinical trial registries were also searched (February 2012).

**Study Selection** RCTs were included where participant selection was made using Petersen et al (1999) defined aMCI. There was no restriction on intervention type or the outcome tested.

**Data Extraction** For each trial we extracted information on study design, demographics, exclusion criteria and the operationalisation strategy for the five aMCI diagnostic criterion including: (1) subjective memory complain, (2) normal general cognitive function, (3) memory impairment, (4) no functional impairment and (5) no dementia.

**Results** 223 articles and 278 registered trials were reviewed of which 22 met inclusion criteria. Various methods were applied for operationalizing aMCI criteria resulting in variability in participant selection. Memory complaint and assessment of general cognitive function were the most consistently measured criteria. There was large heterogeneity in the neuropsychological methods used to determine memory impairment. It was not possible to assess the impact of these differences on case selection accuracy for dementia prediction. Further limitations include selective and unclear reporting of how each of the criteria was measured.

1  
2  
3  
4  
5  
6  
7  
8  
9  
10  
11  
12  
13  
14  
15  
16  
17  
18  
19  
20  
21  
22  
23  
24  
25  
26  
27  
28  
29  
30  
31  
32  
33  
34  
35  
36  
37  
38  
39  
40  
41  
42  
43  
44  
45  
46  
47  
48  
49  
50  
51  
52  
53  
54  
55  
56  
57  
58  
59  
60

**Conclusion** The results highlight the urgent need for a standardised approach to mapping aMCI. Defining a uniform approach to aMCI classicisation should be a priority if further trials are to be undertaken in the older aged population based on this concept.

For peer review only

## ARTICLE SUMMARY

### Article focus

- Accurate identification of individuals with preclinical dementia is important for clinical trial enrolment.
- Diagnosis of preclinical cases is usually made using the amnesic form of Mild Cognitive Impairment (aMCI). While specific criteria for implementation exist there is no operationalisation protocol.
- Research Question: How have criteria for aMCI been operationalised in randomised controlled clinical trials?

### Key messages

- Various methods have been applied for operationalizing aMCI criteria in randomised controlled clinical trials resulting in variability in participant selection.
- The results highlight the urgent need for a standardised approach to mapping aMCI.

### Strengths and limitations

- The review focus on preclinical dementia defined using aMCI. However, not all clinical trials on preclinical cognitive states have however used this definition of MCI.
- We chose to focus on aMCI as this is one of the commonly applied definitions in clinical and research practice.

## INTRODUCTION

As new preventative strategies for dementia are developed, methods to select persons accurately for clinical trial involvement will be needed. In this perspective, mild cognitive impairment (MCI), an intermediate state between normal ageing and dementia has become a focus for trials to prevent or delay progression to Alzheimer's disease. The expectation is that positive results are more likely to be achieved with earlier treatment initiation[1 2]. While several different definitions exist for MCI, Petersen et al[3 4] defined amnesic Mild Cognitive Impairment (aMCI) is often used in clinical and research practice. However, despite being commonly applied, no standardised method for the operationalization of each of the five component criteria (Figure 1) necessary for an aMCI diagnosis exists, resulting in heterogeneity in diagnostic methods and case ascertainment across studies. Indeed, there are numerous possibilities for the measurement of the five criteria as highlight in Figure 1. The lack of an established diagnostic methodology for identifying aMCI cases in clinical trials is problematic as study specific participant selection raises questions regarding the nature of the sample selected, whilst also making cross study comparison and generalizability of findings difficult.

We undertook a systematic review to explore the methods used to classify aMCI cases, defined using Petersen et al[3], in randomised controlled clinical trials (RCTs). The focus was on inclusion criteria and variation in the operationalization of each of the five MCI component criteria as outlined in Figure 1.

## METHODS

This review has been undertaken with adherence to the PRISMA statement[5]. The review protocol is available on request.

### Search Strategy

EMBASE (including Medline) and PSYCHInfo were searched using the following keywords and using Medical Subject Heading (MeSH) terms: ("mild cognitive impairment" OR MCI) AND ("randomised controlled trial" OR "randomized controlled trial" OR RCT). Articles were searched from inception to 6 June 2011, with the search updated on 21 February 2012. Web based searches, using the term 'mild cognitive impairment' were also undertaken in the ISRCTR trial registry

(<http://www.controlled-trials.com>) and on [www.clinicaltrials.gov](http://www.clinicaltrials.gov) (17 February 2012).

Only studies that were published in English were included. Two investigators (BS and TM) independently searched publications using the following inclusion criteria: (1) the study was a RCT; (2) the trial had been completed (was not on-going or terminated) and results published; (3) the authors report selecting participants using the definition of aMCI as reported in Petersen et al (1999), and could include single or multi-domain amnesic MCI subtypes (amendments to criteria were allowed as long as stated and Petersen et al (1999) was referenced); and, (4) the MCI group was analysed separately to the dementia or control groups. The protocol paper or the first publication reporting the primary outcome was selected in case of multiple publications using the same study sample. Titles and abstracts were searched first, followed by the full text of any identified articles. Reviews were also retained and

1  
2  
3  
4 the reference lists of these and each included paper were interrogated.

5  
6 Disagreements were resolved by consensus. Data quality was not assessed, as all  
7  
8 included studies were RCTs.  
9  
10

### 11 12 13 14 **Data Extraction**

15  
16 Data on the lead author, date of publication, study design (country, site, sampling  
17  
18 framework, duration, intervention), demographics (age and gender distributions),  
19  
20 trial exclusion criteria, dementia progression rates and the methods used to  
21  
22 operationalized each of the five component criterion for the diagnosis of aMCI  
23  
24 were abstracted by two investigators (EP and TM) and checked by a third (MS).  
25  
26  
27  
28  
29

### 30 31 **RESULTS**

32  
33 A total of 223 articles were identified from the literature search. From the electronic  
34  
35 search 11 trials were identified from the ISRCTR trial registry and 267 from  
36  
37 [www.clinicaltrials.gov](http://www.clinicaltrials.gov). Based on the title-abstract search 84 articles were identified  
38  
39 for full text review. In total, 22 articles met inclusion criteria and were retained for  
40  
41 this review. Figure 2 shows the selection process using the PRISMA (2009) Flow  
42  
43 Diagram. As shown in Figure 2, articles were mainly excluded as the sample did not  
44  
45 appear to be defined using the Petersen criteria or had inadequate details to support  
46  
47 the use of Petersen criteria (e.g., only stated an objective cognitive deficit), or the  
48  
49 article was a review.  
50  
51  
52  
53  
54  
55  
56  
57  
58  
59  
60



1  
2  
3  
4  
5  
6  
7  
8  
9  
10  
11  
12  
13  
14  
15  
16  
17  
18  
19  
20  
21  
22  
23  
24  
25  
26  
27  
28  
29  
30  
31  
32  
33  
34  
35  
36  
37  
38  
39  
40  
41  
42  
43  
44  
45  
46  
47  
48  
49  
50  
51  
52  
53  
54  
55  
56  
57  
58  
59  
60

Supplementary Table 1 summarises the methodology, demographics, outcomes and operationalization protocol used for identifying aMCI cases in each included article. Trial exclusion criteria varied, but mainly related to cerebrovascular and cardiovascular disease or health and psychiatric related conditions that could be associated with cognitive decline. There were also differences in the population sampled (clinic vs. community), site (single vs. multi-centre), duration (e.g., 90 days to 4 years), and sample demographics (e.g., age range: 50-90 years). Interventions included pharmacological agents and supplementation[6-17] (including: donepezil, galantamine, rofecoxib, fluoxetine, lithium treatment, estrogen treatment [E<sub>2</sub>], vitamin supplementation (E and B), and supplementation with omega-3 polyunsaturated fatty acids, arachidonic and docosahexaenoic acids), insulin therapy[18], physical activity[19 20] (e.g., aerobic exercise), cognitive training/rehabilitation programmes[21-25] (e.g., memory training, strategy learning) and combined therapies including cholinesterase inhibitor (ChEI) use combined with a cognitive training program[26], and physical activity combined with vitamin B supplementation[27]. Only five studies reported dementia progression rates all of which varied: 16%/year[9], 5-6%/year[11], 24% over one year[16], 11.9% over a 24-weeks trial[17] and 15% over four years[12]. Most results were negative.

### **Operationalizing MCI Component Criterion**

Two studies[16 19] did not report details of the operationalization protocol for defining MCI.

**Criterion 1: Memory Complaint**

Five studies[7 8 16 18 19] reported no details on how memory complaint was obtained. The memory complaint was obtained from the subject in four[15 21 22 27] studies while eleven studies[6 9-11 13 14 17 20 23 24 26] utilised subject report and informant corroboration. One study[25] gave unclear details on who reported the complaint. In one study[12] this criterion was operationalized using a history of gradual onset and slow progressive decline in cognitive function, but how this was reported, for example from the subject or informant was not stated. Three studies[10 22 27] used specific scales rather than a single question to assess memory complaint. Smith et al[10] used four items from the Cambridge Examination for Mental Disorders (CAMDEX)[28]. Rapp et al[22] used the Memory Functioning Questionnaire (MFQ)[29] which is a 64-item questionnaire assessing memory problems and use of mnemonics. Van Uffelen et al[27] used a positive response to a single item “do you have memory complaints?” or answering “sometimes” at least twice on the cognition scale of Strawbridge[30].

**Criterion 2: General Cognitive Function**

This criterion was the most consistently measured and was typically operationalized using the Mini Mental State Examination (MMSE) [31] score either alone [6-8 10 11 22] or in combination with other measures including: a structured interview with the patient and informant [24], the Dementia Rating Scale-II [32] (DRS-II) [23], the Mattis Dementia Rating Scale (DRS) [33] (total score) [14], the Telephone Interview for Cognitive Status [34] (TICS) [27], the Clinic Dementia Rating [35] (CDR) score [9 26] or

1  
2  
3  
4 the Alzheimer's disease Assessment Scale-Cognitive Subscale[36] (ADAS-Cog) in  
5  
6 addition with the Clinician Interview-Based Impression of Change[37] (CIBIC)[17].  
7  
8  
9 One study used only the CDR score of 0.5[12].  
10

11  
12  
13  
14 The cut-off chosen for the MMSE varied from 23 to 26. Most studies used a cut-off  
15  
16 value of  $\geq 24$ [6 9-11 22 26 27], but  $\geq 26$ [7],  $\geq 23$ [25], or a score adjusted for  
17  
18 age/education[8 23], were also used. In one study[6], the protocol was modified  
19  
20 during recruitment and the cut-off was adjusted from 24-30 to 24-28. One study [20]  
21  
22 used a 12-Item shortened MMSE with a cut-off score of  $\geq 7$ . Three studies[14 17 24]  
23  
24 specified the use of the MMSE but did not report a cut-off score. Six studies did not  
25  
26 specify operationalization of this criterion[13 15 16 18 19 21].  
27  
28  
29  
30  
31  
32

### 33 ***Criterion 3: Object Memory Decline***

34  
35 Five studies did not specify operationalization of this criterion[7 8 16 19 26].  
36  
37 Numerous different tests were used to assess cognition as shown in Supplementary  
38  
39 Table 2. In addition to inconsistency in test selection there was no consistency in  
40  
41 impairment severity (e.g., 1 standard deviation (SD), 1.5SDs or 2SDs below the  
42  
43 mean). Further, it was not always stated whether cut-off scores for impairment were  
44  
45 adjusted for age, education or pre-morbid ability. In one study[11], severity was  
46  
47 adjusted from 1.5SDs below the mean (used in the first 6 months) to 1SD below the  
48  
49 mean during the course of screening. Based on the nature of the objective deficit,  
50  
51 three studies[14 21 24] reported inclusion of single amnesic or multi-domain  
52  
53  
54  
55  
56  
57  
58  
59  
60

1  
2  
3  
4 amnestic MCI. One study [10] reported the use of combined amnestic and non-  
5  
6  
7 amnestic (single and multi-domain) cases.  
8  
9

10  
11 In terms of non-memory performance one study[22] reported that this was tested  
12  
13 and required to be unimpaired (defined using a cut-off >10<sup>th</sup> percentile). Another[13]  
14  
15 reported that performance was required to be relatively normal in non-memory  
16  
17 domains. In one study[15] division of cases was unclear; the objective deficit in this  
18  
19 study was defined as impairment on a total score comprising five domains  
20  
21 (immediate & delayed memory, visuospatial/construction, language & attention)  
22  
23 assessed using the Repeatable battery for the assessment of neuropsychological  
24  
25 status (RBANS)[38].  
26  
27  
28  
29

30  
31  
32  
33 **Criterion 4: ADL/IADL**  
34

35 Seven studies did not specify operationalization of this criterion[6 8 13 16 19]. In  
36  
37 twelve studies[7 9 11 12 15 17 18 21 23-27], minimal or non-significant functional  
38  
39 impairment was allowed. One study required that in MCI cases that had a MMSE  
40  
41 score between 23 and 25, cognitive impairments did not significantly interfere with  
42  
43 daily activities or social functioning, determined by a caregiver report[25]. This  
44  
45 restriction was not required in MCI cases with a MMSE score  $\geq 26$ .  
46  
47  
48

49  
50 Functional impairment tended to be assessed by self or informant report of difficulty  
51  
52 with ADLs or Basic ADLs. Specific scales were used for functional assessment in some  
53  
54 studies[10 11 21 26 27] including: the Functional Autonomy Measurement  
55  
56  
57  
58  
59  
60

1  
2  
3  
4 System[39] (SMAFQ), the Blessed Dementia Rating Scale-CERAD[40] version, the  
5  
6 Groningen Activity Restriction Scale[41] (GARS) and selected items from the  
7  
8 Lawton[42] and Katz[43] scales or items from the Cambridge Behavioural  
9  
10 Inventory[44] (CBI). In only two studies did it appear that no evidence of any  
11  
12 functional impairment was allowed; one[10] based on 5 items related to ADLs from  
13  
14 the CBI and another[20] specified no decline in ADLs without their measurement  
15  
16 being specified.  
17  
18  
19  
20  
21  
22

### 23 ***Criterion 5: Dementia Diagnosis***

24  
25 Three studies did not specify operationalization of this criterion[7 14 19]. Fourteen[6  
26  
27 8-11 13 15 17 18 20 21 24-26] studies used the Diagnostic and Statistical Manual  
28  
29 (DSM-III-R/IV-TR/-IV)[45 46], National Institute of Neurological and Communicative  
30  
31 Disorders and Stroke and the Alzheimer's Disease and Related Disorders Association  
32  
33 (NINCDS-ADRDA)[47] criteria or National Institute of Neurological Disorders and  
34  
35 Stroke and Association Internationale pour la Recherche et l'Enseignement en  
36  
37 Neurosciences (NINCDS-AIREN)[48] criteria. Two studies used the CDR score[12 16]  
38  
39 and one each used a self-report of a diagnosis[22], clinical judgement[23] or the TICS  
40  
41 combined with a MMSE score<24[27].  
42  
43  
44  
45  
46  
47  
48

### 49 ***Additional Measures***

50  
51 In some studies, additional measures, generally related to the assessment of global  
52  
53 functioning (such as the CDR sum of boxes score) or dementia severity (e.g., from  
54  
55 none, mild, moderate and severe) were made in parallel to the mapping of the five  
56  
57  
58  
59  
60

1  
2  
3  
4 Mayo Clinic criterions. For example, two studies[19 21] administered the Dementia  
5 Rating Scale (DRS), seven[6 8-12 26] the CDR, one[11] the Blessed Dementia Rating  
6 Scale[40] (BDRS), one[17] the CIBIC, and one[25] the Global Deterioration Scale[49]  
7 (GDS). One study[10 50] also had informants complete both the Informant  
8 Questionnaire on Cognitive Decline in the Elderly[51] (IQCODE-Short form) and  
9 EuroQol[52] (EQ-5D), a measure of health status.  
10  
11  
12  
13  
14  
15  
16  
17  
18  
19  
20

## 21 **DISCUSSION**

22  
23 This review highlights the lack of consistency in MCI case ascertainment in currently  
24 completed RCTs. How MCI was diagnosed was not always reported or clear and  
25 varying operationalization protocols make it impossible to determine similarity  
26 across the samples recruited in the different trials. No recruitment protocol for the  
27 selection of MCI cases for future clinical trials can be recommended until  
28 classification accuracy of current methods is tested.  
29  
30  
31  
32  
33  
34  
35  
36  
37  
38  
39

40 The review highlights the classification problem associated with the current Petersen  
41 et al (1999) definition of aMCI. Without a standard operationalization protocol for  
42 defining aMCI trial recruitment will continue to be variable. Consensus needs to be  
43 reached on five core issues relating to the measurement of each of the component  
44 criteria. First, whether memory complaint should be self and/or information  
45 reported and how it should be assessed (e.g., single or multiple items). Second, how  
46 global cognitive function should be assessed with possible measures including the  
47 MMSE, CDR and Global Deterioration Scale, and what the best cut-off score is (within  
48  
49  
50  
51  
52  
53  
54  
55  
56  
57  
58  
59  
60

1  
2  
3  
4 and across cultures). Third, which neuropsychological test(s) should be used to  
5  
6 assess memory[53], what should be the severity of cognitive impairment (1SD,  
7  
8 1.5SD) and whether covariate adjustment is needed. In addition, is the question of  
9  
10 whether both memory and non-memory domains should be tested. Possible tests  
11  
12 identified in this review are outlined in Supplementary Table 2. Fourth, how  
13  
14 functional performance should be assessed (the type of questions), the nature of the  
15  
16 task (e.g., instrumental ADLs, basic ADLs), reporting (patient, informant, clinician)  
17  
18 and what is the maximum level of impairment (e.g., none, mild, moderate or severe  
19  
20 difficulty or significant difficulty in some areas but not in others). Fifth, how  
21  
22 dementia should be defined for exclusion with examples used including: the DSM or  
23  
24 NINCDS-ADRDA criteria, the CDR sum of boxes score  $\geq 1$  or via screening instruments  
25  
26 (e.g., the Telephone Screening Instrument). It should be noted that aMCI is not  
27  
28 always operationalised as originally specified (e.g., permissible significant functional  
29  
30 impairment in some studies) and consensus needs to be reached on whether all five  
31  
32 criterion are necessary. Further, whether modifications (if any) to criteria can be  
33  
34 made and the implications of making modifications, for example, in terms of  
35  
36 dementia predictability and effect on generalizability, needs to be established.  
37  
38  
39  
40  
41  
42  
43  
44  
45  
46

47 Decision also needs to be reached on whether aMCI is the best treatment target. The  
48  
49 impairment captured in aMCI is not always progressive. When mapped in population  
50  
51 based studies (and to a lesser extent in the clinic) aMCI is unstable, with a proportion  
52  
53 of cases reverting to normal or remaining stable at follow-up[54 55]. This raises  
54  
55 questions of utility, especially whether the criteria are sensitive and specific enough  
56  
57  
58  
59  
60

1  
2  
3  
4 for classifying individuals at high risk of dementia progression[56]. A recent task  
5  
6  
7 force on designing trials in early (pre-dementia) AD argues for the use of aMCI  
8  
9  
10 criteria in combination with biomarkers to improve case selection for clinical trials[2  
11  
12 57]. Suggestions for possible biomarkers have included hippocampal or whole brain  
13  
14 atrophy, CSF A $\beta$ 42 levels, PiB imaging, genetic screening (APOE e4 status) or  
15  
16 behavioural deficits[58-60], as each has been associated with dementia. Further,  
17  
18 how dementia and AD are defined is currently undergoing revision[57 61]. Where  
19  
20 MCI now sits in the ever changing “lexicon” of AD (i.e., given there is currently no  
21  
22 concrete border between preclinical and clinical disease) will have implications for  
23  
24 who is targeted for clinical trial recruitment. For example, MCI as defined by  
25  
26 Petersen criteria may no longer be considered at-risk, but as already AD, with the  
27  
28 term “MCI” being replaced by a new definition of early “prodromal AD” (e.g.,  
29  
30 evidence of memory impairment and positive ratings on pathophysiological and  
31  
32 topographical markers of AD)[57].  
33  
34  
35  
36  
37  
38  
39

40 The review should be viewed in light of some limitations. First, we choose to focus  
41  
42 on Petersen defined aMCI, as this is one of the commonly applied definitions in  
43  
44 clinical and research practice. However, not all trials on preclinical cognitive states  
45  
46 have used this definition of MCI with some studies defining intermediate cognitive  
47  
48 states using simply a MMSE score or using criteria that have made refinements to  
49  
50 the original aMCI criteria[62 63]. The main change has been in the acceptable level  
51  
52 of functional impairment: from none to allowing minor problems, particularly in  
53  
54 complex activities such as for example, account keeping. Different definitions of MCI  
55  
56  
57  
58  
59  
60



1  
2  
3  
4 have different prevalence estimates[64] and also vary in their risk of dementia  
5  
6 progression (e.g., more extensive patterns of cognitive changes have been  
7  
8 associated with greater progression of MCI to dementia)[54]. Subtypes have also  
9  
10 been defined depending on the neuropsychological profile including amnesic and  
11  
12 non-amnesic single or multi-domain MCI, and multi-domain combined MCI that  
13  
14 includes both memory and non-memory deficits. Which, if any, of the many different  
15  
16 criteria[65] and sub-types of preclinical decline should be adopted in RCTs or  
17  
18 whether no distinction should be made between MCI and AD during recruitment[2],  
19  
20 requires further discussion.  
21  
22  
23  
24  
25  
26  
27

## 28 **Conclusion**

29  
30 Much work needs to be done on the characterisation of individuals at-risk of  
31  
32 dementia for clinical trial recruitment. Within this framework attention is being  
33  
34 focused on redefining the earliest stages of disease and generating new definitions  
35  
36 of what constitutes “prodromal/pre-dementia” and “at-risk”. Standardisation in  
37  
38 definition and development of an operational protocol will result in improvements in  
39  
40 diagnosis and clinical trial methodology.  
41  
42  
43  
44  
45  
46  
47  
48  
49  
50  
51  
52  
53  
54  
55  
56  
57  
58  
59  
60

## References

1. Petersen RC. Mild cognitive impairment clinical trials. *Nat Rev Drug Discov* 2003;**2**(8):646-53
2. Aisen PS, Andrieu S, Sampaio C, et al. Report of the task force on designing clinical trials in early (predementia) AD. *Neurology* 2011;**76**(3):280-6
3. Petersen RC, Smith GE, Waring SC, et al. Mild Cognitive Impairment: Clinical Characterization and Outcome. *Arch Neurol* 1999;**56**(3):303-08
4. Petersen RC, Doody R, Kurz A, et al. Current concepts in mild cognitive impairment. *Arch Neurol* 2001;**58**(12):1985-92
5. Moher D, Liberati A, Tetzlaff J, et al. Preferred Reporting Items for Systematic Reviews and Meta-Analyses: The PRISMA Statement. *PLoS Med* 2009;**6**(7):e1000097
6. Doody RS, Ferris SH, Salloway S, et al. Donepezil treatment of patients with MCI: A 48-week randomized, placebo-controlled trial. *Neurology* 2009;**72**(18):1555-61
7. Koontz J, Baskys A. Effects of galantamine on working memory and global functioning in patients with mild cognitive impairment: A double-blind placebo-controlled study. *American Journal of Alzheimer's Disease and other Dementias* 2005;**20**(5):295-302
8. Mowla A, Mosavinasab M, Pani A. Does fluoxetine have any effect on the cognition of patients with mild cognitive impairment?: A double-blind, placebo-controlled, clinical trial. *Journal of Clinical Psychopharmacology* 2007;**27**(1):67-70
9. Petersen RC, Thomas RG, Grundman M, et al. Vitamin E and donepezil for the treatment of mild cognitive impairment. *N Engl J Med* 2005;**352**(23):2379-88
10. Smith AD, Smith SM, de Jager CA, et al. Homocysteine-lowering by b vitamins slows the rate of accelerated brain atrophy in mild cognitive impairment: A randomized controlled trial. *PLoS ONE* 2010;**5**(9):1-10
11. Thal LJ, Ferris SH, Kirby L, et al. A randomized, double-blind, study of rofecoxib in patients with mild cognitive impairment. *Neuropsychopharmacology* 2005;**30**(6):1204-15
12. Winblad B, Gauthier S, Scinto L, et al. Safety and efficacy of galantamine in subjects with mild cognitive impairment. *Neurology* 2008;**70**(22):2024-35
13. Chiu CC, Su KP, Cheng TC, et al. The effects of omega-3 fatty acids monotherapy in Alzheimer's disease and mild cognitive impairment: a preliminary randomized double-blind placebo-controlled study. *Prog Neuropsychopharmacol Biol Psychiatry* 2008;**32**(6):1538-44
14. Chen X, Magnotta VA, Duff K, et al. Donepezil effects on cerebral blood flow in older adults with mild cognitive deficits. *J Neuropsychiatry Clin Neurosci* 2006;**18**(2):178-85
15. Kotani S, Sakaguchi E, Warashina S, et al. Dietary supplementation of arachidonic and docosahexaenoic acids improves cognitive dysfunction. *Neurosci Res* 2006;**56**(2):159-64

16. Forlenza OV, Diniz BS, Radanovic M, et al. Disease-modifying properties of long-term lithium treatment for amnesic mild cognitive impairment: randomised controlled trial. *Br J Psychiatry* 2011;**198**(5):351-6
17. Sherwin BB, Chertkow H, Schipper H, et al. A randomized controlled trial of estrogen treatment in men with mild cognitive impairment. *Neurobiol Aging* 2011;**32**(10):1808-17
18. Craft S, Baker LD, Montine TJ, et al. Intranasal insulin therapy for Alzheimer disease and amnesic mild cognitive impairment: a pilot clinical trial. *Arch Neurol* 2012;**69**(1):29-38
19. Baker LD, Frank LL, Foster-Schubert K, et al. Effects of aerobic exercise on mild cognitive impairment: a controlled trial. *Arch Neurol* 2010;**67**(1):71-9
20. Scherder EJ, Van Paasschen J, Deijen JB, et al. Physical activity and executive functions in the elderly with mild cognitive impairment. *Aging Ment Health* 2005;**9**(3):272-80
21. Jean L, Simard M, Wiederkehr S, et al. Efficacy of a cognitive training programme for mild cognitive impairment: Results of a randomised controlled study. *Neuropsychological Rehabilitation* 2010;**20**(3):377-405
22. Rapp S, Brenes G, Marsh AP. Memory enhancement training for older adults with mild cognitive impairment: A preliminary study. *Aging and Mental Health* 2002;**6**(1):5-11
23. Troyer AK, Murphy KJ, Anderson ND, et al. Changing everyday memory behaviour in amnesic mild cognitive impairment: A randomised controlled trial. *Neuropsychological Rehabilitation* 2008;**18**(1):65-88
24. Kinsella GJ, Mullaly E, Rand E, et al. Early intervention for mild cognitive impairment: a randomised controlled trial. *Journal of Neurology, Neurosurgery & Psychiatry* 2009;**80**(7):730-36
25. Buschert VC, Friese U, Teipel SJ, et al. Effects of a newly developed cognitive intervention in amnesic mild cognitive impairment and mild Alzheimer's disease: a pilot study. *J Alzheimers Dis* 2011;**25**(4):679-94
26. Rozzini L, Costardi D, Chilovi V, et al. Efficacy of cognitive rehabilitation in patients with mild cognitive impairment treated with cholinesterase inhibitors. *International Journal of Geriatric Psychiatry* 2007;**22**(4):356-60
27. Van Uffelen JGZ, Hopman-Rock M, Chin A Paw MJM, et al. Protocol for Project FACT: A randomised controlled trial on the effect of a walking program and vitamin B supplementation on the rate of cognitive decline and psychosocial wellbeing in older adults with mild cognitive impairment [ISRCTN19227688]. *BMC Geriatrics* 2005;**5**(18):doi:10.1186/471-2318-5-18
28. Roth M, Tym E, Mountjoy CQ, et al. CAMDEX: The cambridge examination for mental disorders of the elderly. Cambridge: Cambridge University Press, 1988.
29. Gilewski MJ, Zelinski EM. Memory Functioning Questionnaire (MFQ). *Psychopharmacology bulletin* 1988;**24**(4):665-70
30. Strawbridge WJ, Shema SJ, Balfour JL, et al. Antecedents of frailty over three decades in an older cohort. *The journals of gerontology. Series B, Psychological sciences and social sciences* 1998;**53**(1):S9-16

- 1
- 2
- 3
- 4
- 5 31. Folstein MF, Folstein SE, McHugh PR. "Mini-mental state". A practical method for
- 6 grading the cognitive state of patients for the clinician. *J Psychiatr Res*
- 7 1975;**12**(3):189-98
- 8 32. Jurica PJ, Leitten CL, Mattis S. *Dementia Rating Scale-2: Professional manual*.
- 9 Lutz: Psychological Assessment Resources, 2001.
- 10 33. Mattis S. *Dementia Rating Scale: Professional manual*. Odessa, FL: Psychological
- 11 Assessment Resources, 1988.
- 12 34. Brandt J, Spencer M, Folstein M. The telephone interview for cognitive status.
- 13 *Neuropsychiatry, Neuropsychology and Behavioral Neurology* 1988;**1**:111-17
- 14 35. Hughes CP, Berg L, Danziger WL, et al. A new clinical scale for the staging of
- 15 dementia. *Br J Psychiatry* 1982;**140**:566-72
- 16 36. Rosen WG, Mohs RC, Davis KL. A new rating scale for Alzheimer's disease. *The*
- 17 *American journal of psychiatry* 1984;**141**(11):1356-64
- 18 37. Schneider LS, Olin JT, Doody RS, et al. Validity and reliability of the Alzheimer's
- 19 Disease Cooperative Study-Clinical Global Impression of Change. *The*
- 20 *Alzheimer's Disease Cooperative Study. Alzheimer disease and associated*
- 21 *disorders* 1997;**11 Suppl 2**:S22-32
- 22 38. Randolph C, Tierney MC, Mohr E, et al. The Repeatable Battery for the
- 23 Assessment of Neuropsychological Status (RBANS): preliminary clinical
- 24 validity. *J Clin Exp Neuropsychol* 1998;**20**(3):310-9
- 25 39. Hebert R, Carrier R, Bilodeau A. The Functional Autonomy Measurement System
- 26 (SMAF): description and validation of an instrument for the measurement of
- 27 handicaps. *Age Ageing* 1988;**17**(5):293-302
- 28 40. Morris JC, Mohs RC, Rogers H, et al. Consortium to establish a registry for
- 29 Alzheimer's disease (CERAD) clinical and neuropsychological assessment of
- 30 Alzheimer's disease. *Psychopharmacology bulletin* 1988;**24**(4):641-52
- 31 41. Kempen GI, Miedema I, Ormel J, et al. The assessment of disability with the
- 32 Groningen Activity Restriction Scale. Conceptual framework and
- 33 psychometric properties. *Soc Sci Med* 1996;**43**(11):1601-10
- 34 42. Lawton MP, Brody EM. Assessment of older people: self-maintaining and
- 35 instrumental activities of daily living. *Gerontologist* 1969;**9**(3):179-86
- 36 43. Katz S, Downs TD, Cash HR, et al. Progress in development of the index of ADL.
- 37 *Gerontologist* 1970;**10**(1):20-30
- 38 44. Wedderburn C, Wear H, Brown J, et al. The utility of the Cambridge Behavioural
- 39 Inventory in neurodegenerative disease. *J Neurol Neurosurg Psychiatry*
- 40 2008;**79**(5):500-3
- 41 45. American Psychiatric Association. *Diagnostic and Statistical Manual of Mental*
- 42 *Disorders (Third Edition, revised) (DSM-III-R)*. Washington, DC: APA, 1987.
- 43 46. American Psychiatric Association. *Diagnostic and Statistical Manual of Mental*
- 44 *Disorders (Fourth Edition) (Text Revision: DMS-IV-TR)* Arlington, VA: American
- 45 Psychiatric Publishing Inc, 2000.
- 46 47. McKhann G, Drachman D, Folstein M, et al. Clinical diagnosis of Alzheimer's
- 47 disease: report of the NINCDS-ADRDA Work Group under the auspices of
- 48 Department of Health and Human Services Task Force on Alzheimer's
- 49 Disease. *Neurology* 1984;**34**(7):939-44
- 50
- 51
- 52
- 53
- 54
- 55
- 56
- 57
- 58
- 59
- 60

- 1
- 2
- 3
- 4
- 5 48. Roman GC, Tatemichi TK, Erkinjuntti T, et al. Vascular dementia: diagnostic
- 6 criteria for research studies. Report of the NINDS-AIREN International
- 7 Workshop. *Neurology* 1993;**43**(2):250-60
- 8 49. Reisberg B, Ferris SH, de Leon MJ, et al. The Global Deterioration Scale for
- 9 assessment of primary degenerative dementia. *The American journal of*
- 10 *psychiatry* 1982;**139**(9):1136-9
- 11 50. de Jager CA, Oulhaj A, Jacoby R, et al. Cognitive and clinical outcomes of
- 12 homocysteine-lowering B-vitamin treatment in mild cognitive impairment: a
- 13 randomized controlled trial. *International Journal of Geriatric Psychiatry*
- 14 *2012*;**26**(6):592-600
- 15 51. Jorm AF. The Informant Questionnaire on cognitive decline in the elderly
- 16 (IQCODE): a review. *Int Psychogeriatr* 2004;**16**(3):275-93
- 17 52. EuroQol Group. EuroQol-A new facility for the measurement of health-related
- 18 quality of life. *Health Policy* 1990;**16**:199-208
- 19 53. Lonie JA, Tierney KM, Ebmeier KP. Screening for mild cognitive impairment: a
- 20 systematic review. *Int J Geriatr Psychiatry* 2009;**24**(9):902-15
- 21 54. Matthews FE, Stephan BC, McKeith IG, et al. Two-year progression from mild
- 22 cognitive impairment to dementia: to what extent do different definitions
- 23 agree? *J Am Geriatr Soc* 2008;**56**(8):1424-33
- 24 55. Mitchell AJ, Shiri-Feshki M. Rate of progression of mild cognitive impairment to
- 25 dementia--meta-analysis of 41 robust inception cohort studies. *Acta*
- 26 *psychiatrica Scandinavica* 2009;**119**(4):252-65
- 27 56. Stephan BC, Kurth T, Matthews FE, et al. Dementia risk prediction in the
- 28 population: are screening models accurate? *Nature reviews. Neurology*
- 29 *2010*;**6**(6):318-26
- 30 57. Dubois B, Feldman HH, Jacova C, et al. Revising the definition of Alzheimer's
- 31 disease: a new lexicon. *The Lancet Neurology* 2010;**9**(11):1118-27
- 32 58. Whitehair DC, Sherzai A, Emond J, et al. Influence of apolipoprotein e (epsilon)4
- 33 on rates of cognitive and functional decline in mild cognitive impairment.
- 34 *Alzheimer's and Dementia* 2010;**6**(5):412-19
- 35 59. Jack CR, Jr., Knopman DS, Jagust WJ, et al. Hypothetical model of dynamic
- 36 biomarkers of the Alzheimer's pathological cascade. *Lancet Neurol*
- 37 *2010*;**9**(1):119-28
- 38 60. Gauthier S, Reisberg B, Zaudig M, et al. Mild cognitive impairment. *Lancet*
- 39 *2006*;**367**(9518):1262-70
- 40 61. Sperling RA, Aisen PS, Beckett LA, et al. Toward defining the preclinical stages of
- 41 Alzheimer's disease: recommendations from the National Institute on Aging-
- 42 Alzheimer's Association workgroups on diagnostic guidelines for Alzheimer's
- 43 disease. *Alzheimers Dement* 2011;**7**(3):280-92
- 44 62. Winblad B, Palmer K, Kivipelto M, et al. Mild cognitive impairment--beyond
- 45 controversies, towards a consensus: report of the International Working
- 46 Group on Mild Cognitive Impairment. *J Intern Med* 2004;**256**(3):240-6
- 47 63. Albert MS, DeKosky ST, Dickson D, et al. The diagnosis of mild cognitive
- 48 impairment due to Alzheimer's disease: recommendations from the National
- 49
- 50
- 51
- 52
- 53
- 54
- 55
- 56
- 57
- 58
- 59
- 60

- 1  
2  
3  
4 Institute on Aging-Alzheimer's Association workgroups on diagnostic  
5 guidelines for Alzheimer's disease. *Alzheimers Dement* 2011;**7**(3):270-9  
6  
7 64. Stephan BC, Matthews FE, McKeith IG, et al. Early cognitive change in the general  
8 population: how do different definitions work? *J Am Geriatr Soc*  
9 2007;**55**(10):1534-40  
10  
11 65. Matthews FE, Stephan BC, Bond J, et al. Operationalization of mild cognitive  
12 impairment: a graphical approach. *PLoS Med* 2007;**4**(10):1615-9  
13  
14  
15  
16  
17  
18  
19  
20  
21  
22  
23  
24  
25  
26  
27  
28  
29  
30  
31  
32  
33  
34  
35  
36  
37  
38  
39  
40  
41  
42  
43  
44  
45  
46  
47  
48  
49  
50  
51  
52  
53  
54  
55  
56  
57  
58  
59  
60

For peer review only

1  
2  
3  
4  
5  
6  
7  
8  
9  
10  
11  
12  
13  
14  
15  
16  
17  
18  
19  
20  
21  
22  
23  
24  
25  
26  
27  
28  
29  
30  
31  
32  
33  
34  
35  
36  
37  
38  
39  
40  
41  
42  
43  
44  
45  
46  
47  
48  
49  
50  
51  
52  
53  
54  
55  
56  
57  
58  
59  
60

**Additional Files Attached**

**Figure 1** Petersen criteria for amnesic MCI (aMCI)

**Figure 2** PRISMA (2009) flow diagram of article selection

**Supplementary Table 1** Characteristics of included studies

**Supplementary Table 2** Tasks used to assess the MCI criteria of “objective cognitive decline” (alphabetic order)

**Acknowledgements****Author Contributions**

ICMJE authorship met by all authors. BS and TM designed the review. BS, TM, EP and MS contributed to review article selection, data extraction and writing the results section. BS, TM and MS wrote the first draft of the paper. CM and IM made substantial contribution to the intellectual content. All authors contributed to the final version and approve its submission.

**Funding Statement**

This research received no specific grant from any funding agency in the public, commercial or not-for-profit sectors. The authors were personally salaried by their institutions during the period of writing (though no specific salary was set aside or given for the writing of this paper).

**Competing Interests**

No author has a conflict of interest to declare.

**Data Sharing Statement**

The manuscript is a systematic review. The review protocol is available on request from the corresponding author.



1  
2  
3  
4  
5  
6  
7  
8 **Figure 1** Petersen criteria for amnesic MCI (aMCI)  
9

|    |                                                                             |
|----|-----------------------------------------------------------------------------|
| 10 | 1. Subjective memory complaint (preferably corroborated by an informant)    |
| 11 | <b>Operationalisation Issues</b> Participant, informant, single question,   |
| 12 | questionnaire                                                               |
| 13 |                                                                             |
| 14 | 2. Normal general cognitive function                                        |
| 15 | <b>Operationalisation Issues</b> Test selection, use of a cut-off score,    |
| 16 | adjustments for age, education or prior ability                             |
| 17 |                                                                             |
| 18 | 3. Objective memory impairment                                              |
| 19 | <b>Operationalisation Issues</b> Test selection, use of a cut-off score,    |
| 20 | adjustments for age, education or prior ability                             |
| 21 |                                                                             |
| 22 | 4. Preserved activities of daily living (ADL)                               |
| 23 | <b>Operationalisation Issues</b> Type of impairment such as instrumental or |
| 24 | basic activities of living, degree of difficulty (if any) allowed           |
| 25 |                                                                             |
| 26 | 5. No dementia                                                              |
| 27 | <b>Operationalisation Issues</b> Impact of diagnostic criteria on caseness  |

28  
29 Petersen criteria for amnesic MCI (aMCI)  
30 102x66mm (300 x 300 DPI)  
31  
32  
33  
34  
35  
36  
37  
38  
39  
40  
41  
42  
43  
44  
45  
46  
47  
48  
49  
50  
51  
52  
53  
54  
55  
56  
57  
58  
59  
60

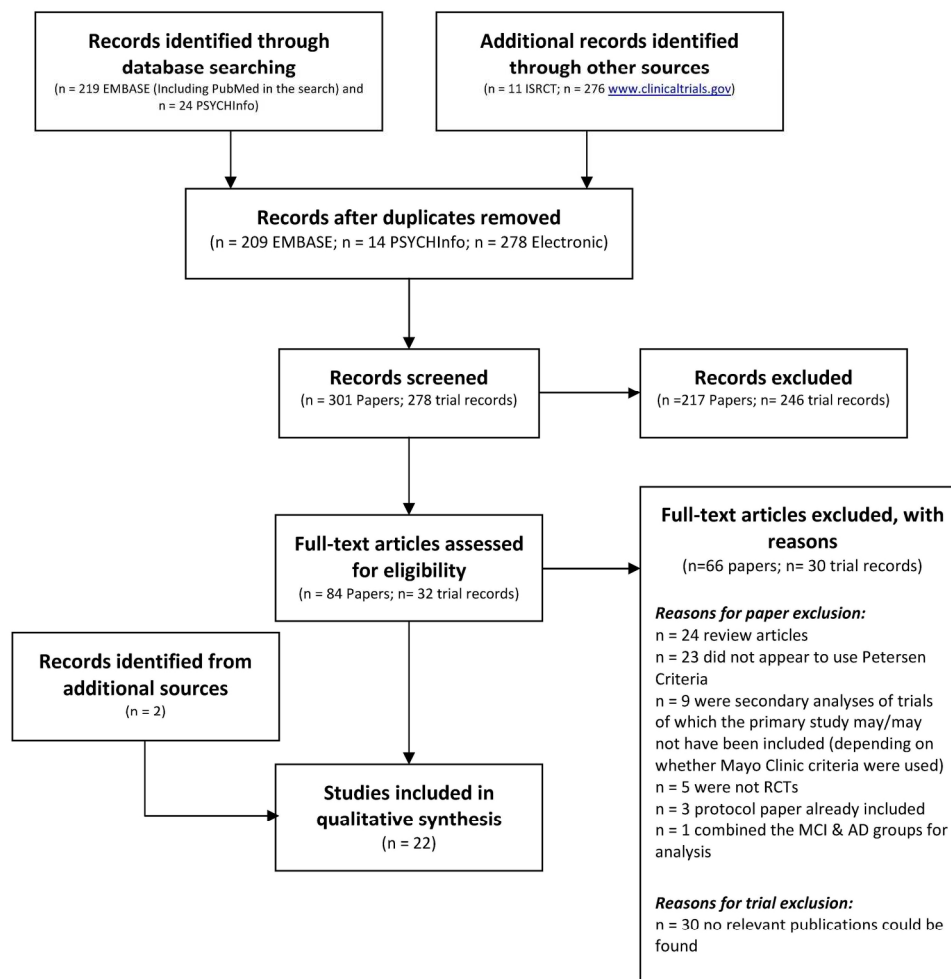

Figure 2. PRISMA (2009) flow diagram of article selection  
191x205mm (300 x 300 DPI)

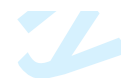

**Supplementary Table 1** Characteristics of included studies (First 9 Columns)

| Reference                    | Sample (Country)                                                     | Intervention                                                                                                                        | Number of Subjects Randomised                                                                                                | Age Range                                              | Gender (M:F)       | Mean Baseline MMSE (MCI cases)               | Single or Multi Domain Amnesic MCI | Role of Clinical Judgement                                                                                                                                 |
|------------------------------|----------------------------------------------------------------------|-------------------------------------------------------------------------------------------------------------------------------------|------------------------------------------------------------------------------------------------------------------------------|--------------------------------------------------------|--------------------|----------------------------------------------|------------------------------------|------------------------------------------------------------------------------------------------------------------------------------------------------------|
| Baker 2010                   | Memory Clinic (USA)                                                  | Exercise vs. Stretching. Duration: 6 months                                                                                         | 19 MCI (Aerobic), 10 MCI (Stretching)                                                                                        | 55-85                                                  | 15:14              | 27.4                                         | NS                                 | Unknown                                                                                                                                                    |
| Buschert 2011 & Forster 2011 | Dementia Research Section & University Based Memory Clinic (Germany) | Multicomponent cognitive intervention vs. Active control. NOTE: The intervention varied for the MCI & AD groups. Duration: 6 months | 24 aMCI (12 intervention, 12 control), 15 Mild AD (8 intervention, 7 control)                                                | 50+                                                    | 19:20              | 27.4 (1.6)                                   | Either                             | Comprehensive clinical and neurological assessment to support the diagnosis of MCI or mild AD                                                              |
| Chen 2006                    | Community volunteers (USA)                                           | Donepezil (titrated to 10mg daily over 6 weeks & continued for 6 months) vs. Placebo. Duration: 6 months                            | 4 MCI (Treatment) vs. 7 MCI (Placebo)                                                                                        | M=74.8 (SD=7.4) [Treatment]; M=68.4 (SD=4.0) [Placebo] | 4:7                | 29.8 (0.5) [Treatment]; 29.6 (0.8) [Placebo] | Either                             | Reviewed all available medical records, current medications and undertook patient examination (for health related inclusion)                               |
| Chiu 2008                    | Newspaper recruited (1 site; Taiwan)                                 | Omega-3 PUFAs (3 capsules twice daily; 1080mg EPA+720mg DHA) vs. Placebo (Olive oil). Duration: 24 weeks                            | 10 AD/14 MCI (Omega-3); 13 AD/9 MCI (Placebo)                                                                                | 55-90                                                  | NS (for MCI cases) | NS                                           | NS                                 | Completed medical, psychiatric and neuropsychological assessment                                                                                           |
| Craft 2012                   | Clinical Research Unit of a Veterans Affairs medical center (USA)    | Intranasal insulin (10 or 20 IU twice/day for a total dose of 20 or 40 IU/day) vs. Placebo (Saline twice a day). Duration: 4 months | 64 MCI [n=21 Placebo, n=20 20-IU, n=23 40-IU] vs. 40 Probable AD (CDR=0.5-1 & MMSE>15) [n=9 Placebo, n=16 20-IU, n=15 40-IU] | 55+                                                    | 59:45              | NS                                           | NS                                 | Diagnosis of aMCI by expert consensus based on all available data: cognitive testing, medical history, physical examination, clinical laboratory screening |

| Reference     | Sample (Country)                                 | Intervention                                                                                                                                                     | Number of Subjects Randomised                                                          | Age Range                                                               | Gender (M:F) | Mean Baseline MMSE (MCI cases)                   | Single or Multi Domain Amnesic MCI  | Role of Clinical Judgement                                       |
|---------------|--------------------------------------------------|------------------------------------------------------------------------------------------------------------------------------------------------------------------|----------------------------------------------------------------------------------------|-------------------------------------------------------------------------|--------------|--------------------------------------------------|-------------------------------------|------------------------------------------------------------------|
| Doody 2009    | Multicentre (USA)                                | Donepezil (5 mg/day for 6 weeks followed by 10 mg/day) vs. Placebo. Duration: 48 weeks                                                                           | 409 MCI (Treatment), 412 MCI (Placebo)                                                 | 45-90                                                                   | 424:354      | 27.5                                             | NS                                  | Unknown                                                          |
| Forlenza 2011 | Community Dwelling Out-patients (1 site; Brazil) | Low dose lithium (150mg titrated to target serum levels of 0.25-0.5 mmol/l) vs. Placebo. Duration: 1 year                                                        | 24 MCI (Lithium) vs. 21 MCI (Placebo)                                                  | 60+                                                                     | NS           | NS                                               | NS                                  | NS                                                               |
| Jean 2010     | Unknown (Canada)                                 | Errorless learning (EL) + spatial retrieval vs. Errorful learning (EF). All groups given information about memory (n=6 sessions). Duration: 10 weeks             | 11 MCI (Training), 11 MCI (Controls)                                                   | 50+                                                                     | 9:13         | 29.5                                             | Either (12 single; 10 multi-domain) | Neuropsychologist judgement used to properly identify aMCI cases |
| Kinsella 2009 | Memory Clinic (2 sites; Australia)               | Memory intervention vs. Waitlist control. Duration: 5 weeks                                                                                                      | 22 (Intervention), 22 (Waitlist)                                                       | M=78.9 (SD=5.7) (Intervention); M=74.7 (SD=6.1) (Waitlist)              | 19:25        | 25.9 (2.8) [Intervention]; 26.8 (1.8) [Waitlist] | Either                              | Unknown                                                          |
| Koontz 2005   | Outpatients (1 site; USA)                        | Galantamine (Dose escalation: 8, 15, 24 mg/d) vs. Placebo. Duration: 16 weeks                                                                                    | 8 MCI (Treatment), 11 MCI (Control)                                                    | 51-87                                                                   | 19:0         | Unknown                                          | NS                                  | Unknown                                                          |
| Kotani 2006   | Out patients Minami-gaoka Hospital (Japan)       | PUFA [Arachidonic acid (ARA) & docosahexaenoic acid (DHA): 240mg/day of each: 6 capsules/day] vs. Placebo (Olive oil: MCI Placebo group only). Duration: 90 days | 12 (MCI Treatment) vs. 9 (MCI Placebo) vs. 10 (Organic brain lesions) vs. 8 (Early AD) | M=68.1 (SD=6.3) [MCI]; M=57.5 (SD=12.4) [Organic]; M=67.0 (SD=6.3) [AD] | 19:20        | NS                                               | Either                              | Unknown                                                          |

| Reference     | Sample (Country)                                                                | Intervention                                                                                                                                                    | Number of Subjects Randomised                                    | Age Range       | Gender (M:F)  | Mean Baseline MMSE (MCI cases)                                                                                                 | Single or Multi Domain Amnesic MCI | Role of Clinical Judgement                                                                                  |
|---------------|---------------------------------------------------------------------------------|-----------------------------------------------------------------------------------------------------------------------------------------------------------------|------------------------------------------------------------------|-----------------|---------------|--------------------------------------------------------------------------------------------------------------------------------|------------------------------------|-------------------------------------------------------------------------------------------------------------|
| Mowla 2007    | Referrals for memory problems (Iran)                                            | Fluoxetine (10 mg/d baseline, increase by 20mg/d in 1-2 weeks) vs. Placebo. Duration: 8 weeks                                                                   | 33 MCI (Treatment), 25 MCI (Control)                             | 55-75           | 56.8% (Women) | 23.9                                                                                                                           | NS                                 | Unknown                                                                                                     |
| Petersen 2005 | AD Cooperative Sites (69 sites; USA & Canada)                                   | Vitamin E (2000 IU) vs. Donepezil (5mg/d initially to 10mg after 6 weeks) vs. Placebo. Duration: 3 years                                                        | 253 (Donepezil), 257 (Vitamin E), 259 (Placebo)                  | 55-90           | 417:352       | 27.3                                                                                                                           | NS                                 | Reviewed clinical and psychometric data to diagnose AD                                                      |
| Rapp 2002     | Community dwelling (USA)                                                        | Cognitive & behavioural treatment (6 weekly group meetings) vs. Control (No memory education or training). Duration: 6 weeks                                    | 9 MCI (Treatment), 10 MCI (Control)                              | M=75.1 (SD=7.0) | 8:11          | 27.6                                                                                                                           | NS                                 | Unknown                                                                                                     |
| Rozzini 2007  | Independent living (2 sites; Italy)                                             | ChEIs vs. ChEIs + Neuropsychological training (TNP) vs. Not treated. Duration: 3 blocks of sessions every 2 months (Consisting of 20 individual sessions/block) | 22 (ChEIs), 15 (ChEIs + Cognitive rehabilitation), 22 (Control)  | 63-78           | Unknown       | 26.4                                                                                                                           | NS                                 | Clinical interview to determine normal general cognitive function, physical functioning and dementia status |
| Scherder 2005 | Residents of a combined home for the elderly/nursing home (1 site; Netherlands) | Walking Group vs. Hand & Face Exercises vs. Control. Duration: 6 weeks (30 mins/day; 3 times/week)                                                              | 15 MCI (Walking), 13 MCI (Hand/Face Exercises), 15 MCI (Control) | M=86            | 5:38          | Used a 12-Item short MMSE version [Range 0-12]. M=9.7 (SD=1.9) [Walking]; M=9.2 (SD=1.3) [Hand/Face]; M=9.9 (SD=1.4) [Control] | NS                                 | NS                                                                                                          |

| Reference                  | Sample (Country)                                                                                        | Intervention                                                                                                                                                                                                                                                                                                                             | Number of Subjects Randomised                                                                     | Age Range | Gender (M:F)                               | Mean Baseline MMSE (MCI cases)             | Single or Multi Domain Amnestic MCI                                  | Role of Clinical Judgement                                                                                       |
|----------------------------|---------------------------------------------------------------------------------------------------------|------------------------------------------------------------------------------------------------------------------------------------------------------------------------------------------------------------------------------------------------------------------------------------------------------------------------------------------|---------------------------------------------------------------------------------------------------|-----------|--------------------------------------------|--------------------------------------------|----------------------------------------------------------------------|------------------------------------------------------------------------------------------------------------------|
| Sherwin 2011               | Memory clinic                                                                                           | Estrogen (1mg/day micronised E <sub>2</sub> orally) vs. Placebo. Duration: 24 weeks (12 weeks treatment & 12 weeks cross-over)                                                                                                                                                                                                           | 22 MCI (Treatment-placebo; GROUP A; 16 analysed) vs. 21 (Placebo-treatment; GROUP B; 12 analysed) | 55-95     | 43:0                                       | 27.0 (2.0) [GROUP A]; 27.8 (2.3) [GROUP B] | NS                                                                   | Expert evaluation to determine MCI                                                                               |
| Smith 2010 & de Jager 2011 | Single centre ( via local newspaper and radio seeking elderly people with memory concerns) (1 site; UK) | Supplementary B vitamins (folic acid 0.8mg/d, vitamin B12 0.5mg/d + vitamin B6 20mg/d) vs. Placebo. Duration: 2 years                                                                                                                                                                                                                    | 113 (85 completed MRI protocol) (Treatment), 110 (83 completed MRI protocol) (Placebo)            | 70+       | 66:102                                     | 28.3                                       | Amnestic or non-amnestic (single or multi-domain on either subtypes) | Unknown                                                                                                          |
| Thal 2005                  | Multicentre (46 sites; USA)                                                                             | Rofecoxib 25mg once daily vs. Placebo once daily. Duration: up to 4 years                                                                                                                                                                                                                                                                | 725 (Rofecoxib), 732 (Placebo)                                                                    | 65+       | 31% women (Placebo), 34% women (Rofecoxib) | 27.3                                       | NS                                                                   | In some cases the patient was determined by an investigator to have developed dementia despite their CDR results |
| Troyer 2008                | Physician referrals & newspaper advertisements (Canada)                                                 | 10 2-hour sessions over 6 months. Sessions grouped into: 1) info regarding a lifestyle factor that can affect memory function (e.g., nutrition), 2) focused memory intervention training, 3) review of information or intervention &/or 4) outcome testing. Participants given weekly assignments to complete at home. Duration: 2 years | 24 (Intervention), 24 (Control)                                                                   | M=75.4    | 32:36                                      | 27.8                                       | NS                                                                   | Clinical evaluation & consensus used to classify aMCI                                                            |

| Reference                     | Sample (Country)                                                                                    | Intervention                                                                                                                                                                                                                                                                           | Number of Subjects Randomised                                                     | Age Range | Gender (M:F) | Mean Baseline MMSE (MCI cases) | Single or Multi Domain Amnesic MCI | Role of Clinical Judgement |
|-------------------------------|-----------------------------------------------------------------------------------------------------|----------------------------------------------------------------------------------------------------------------------------------------------------------------------------------------------------------------------------------------------------------------------------------------|-----------------------------------------------------------------------------------|-----------|--------------|--------------------------------|------------------------------------|----------------------------|
| Van Uffelen 2007, 2008 & 2009 | Community dwelling (Netherlands)                                                                    | Pharmacological + Activity. Two conditions: 1) a twice-weekly group based moderate intensity walking programme vs. a low-intensity placebo activity programme & 2) daily vitamin pill containing 5mg folic acid, 0.4mg vitamin B12, 50mg vitamin B6 vs. placebo pill. Duration: 1 year | 152 total including: 77 (Walking), 75 (Low intensity), 78 (Vitamin), 74 (Placebo) | 70-80     | 44% women    | Median=29 (in all 4 groups)    | NS                                 | Unknown                    |
| Winblad 2008                  | Multicentre (177 centres). Two studies (one with the addition of MRI) (International: 16 countries) | Galantamine (4mg BID for 1 month then 8mg BID for 1 month (plus 12mg BID if well tolerated)) vs. Placebo. Duration: 24 months (Each study)                                                                                                                                             | Study 1 (494 Galantamine, 496 Control); Study 2 (532 Galantamine, 526 Control)    | 50+       | 916:1132     | Unknown                        | NS                                 | Unknown                    |

Table 1 Continued ...

**Table 1** Characteristics of included studies (Last 8 Columns)

| Reference                    | CRD or other Global score                                           | Memory Complaint               | Objective Deficit                                                                                                                             | Cut-off                                                                        | Global Cognitive Function                                              | ADL                                                                                                   | Other                                                                     | Dementia Diagnostic Criteria        |
|------------------------------|---------------------------------------------------------------------|--------------------------------|-----------------------------------------------------------------------------------------------------------------------------------------------|--------------------------------------------------------------------------------|------------------------------------------------------------------------|-------------------------------------------------------------------------------------------------------|---------------------------------------------------------------------------|-------------------------------------|
| Baker 2010                   | Dementia Rating Scale (DRS)                                         | NS                             | NS                                                                                                                                            | NS                                                                             | NS                                                                     | NS                                                                                                    | N/A                                                                       | NS                                  |
| Buschert 2011 & Forster 2011 | Global Deterioration Scale (GDS) (for MCI GDS=3; for mild AD GDS=4) | Memory complaint               | Impaired on at least one of three memory tests: CERAD Neuropsychological Battery Immediate-recall, Delayed-recall &/or Recognition            | 1.5SD (Age/education adjusted)                                                 | MMSE $\geq$ 23                                                         | No impairment in daily activities or social functioning in MCI cases where their MMSE score was 23-25 | N/A                                                                       | DSM-IV/NINCDS-ADRDA criteria for AD |
| Chen 2006                    | N/A                                                                 | Self-perception of memory loss | Impaired on a least one of: Mattis Dementia Rating Scale: Memory subscale, Logical Memory (WMS-III) or Brief Visuospatial Memory Test-Revised | 1SD (Age adjusted based on pre-morbid function)                                | MMSE & Mattis Dementia Rating Scale total score (within normal limits) | No self-reported difficulties with ADL                                                                | Barona IQ estimate, MMSE, Hopkins Verbal Learning Test Revised (HVLTR)    | NS                                  |
| Chiu 2008                    | N/A                                                                 | Self or informant              | Logical Memory delayed recall (WMS-III). Relatively normal performance in non-memory domains                                                  | 1.5SD (Age/education adjusted)                                                 | NS                                                                     | No impairment (scale not specified)                                                                   | CT scan or Hachinski's Ischemic Scale (used to exclude vascular dementia) | DSM-IV                              |
| Craft 2012                   | N/A                                                                 | NS                             | Delayed story-recall score                                                                                                                    | 1.5SD (Age/education adjusted of pre-morbid ability [Shipley Vocabulary Test]) | NS                                                                     | NS                                                                                                    | N/A                                                                       | NINCDS-ADRDA criteria for AD        |



| Reference     | CRD or other Global score                                                           | Memory Complaint                                                | Objective Deficit                                                                                                                                                                                                                              | Cut-off                                                                                                      | Global Cognitive Function                                                                | ADL                                                                                                                                  | Other                                                             | Dementia Diagnostic Criteria                                                         |
|---------------|-------------------------------------------------------------------------------------|-----------------------------------------------------------------|------------------------------------------------------------------------------------------------------------------------------------------------------------------------------------------------------------------------------------------------|--------------------------------------------------------------------------------------------------------------|------------------------------------------------------------------------------------------|--------------------------------------------------------------------------------------------------------------------------------------|-------------------------------------------------------------------|--------------------------------------------------------------------------------------|
| Doody 2009    | CDR=0.5 (Memory Box 0.5 or 1; no more than two other Box scores rated as high as 1) | Change from previous functioning corroborated by an informant   | CDR Memory Box Score 0.5 or 1, WMS Logical Memory II delayed paragraph recall score                                                                                                                                                            | Education adjusted paragraph recall score: $\leq 8$ (16+ years), $\leq 4$ (8-15 years), $\leq 2$ (0-7 years) | MMSE 24-28 (24-30 before protocol amendment)                                             | NS                                                                                                                                   | Rosen modified Hachinski Ischemia scale scores $\leq 4$ , CT scan | Probable/Possible Vascular dementia (NINCDS/ADRDA, DSM-IV) or other form of dementia |
| Forlenza 2011 | CDR (cut-off not specified)                                                         | NS                                                              | NS                                                                                                                                                                                                                                             | NS                                                                                                           | NS                                                                                       | NS                                                                                                                                   | Cambridge Cognitive Examination (CAMCOG)                          | NS                                                                                   |
| Jean 2010     | Dementia Rating Scale-2nd Edition (DRS-2) Score $\geq 7$                            | Difficulty in recall of face-name associations in everyday life | California Verbal Learning Test Second Edition (CVLT-II; primarily used for diagnosis of aMCI), Animal Naming, Trail Making Test (TMT) A & B, Clock Drawing Test                                                                               | 1.5SD (on the CVLT-II)                                                                                       | NS                                                                                       | Absence or few problems (Functional Autonomy Measurement System (SMAF); IADL items score 0 to -8)                                    | N/A                                                               | Possible/probable AD (DSM-IV-TR or NINCDS/ADRDA), or any other form of dementia      |
| Kinsella 2009 | N/A                                                                                 | Complaint by patient and/or informant                           | HVLT-R, Rey Auditory Verbal Learning Task (RAVLT), Wechsler Logical Prose Passages, Word List Learning or Verbal Paired Associates                                                                                                             | 1.5SD (Age/education adjusted)                                                                               | Relatively normal on structured interview with the patient and informant and on the MMSE | No impairment in personal ADL as determined by clinical interview with the patient & their family (IADL could be minimally impaired) | Wechsler Test of Adult Reading (WTAR)                             | NINCDS-ADRDA criteria for AD                                                         |
| Koontz 2005   | N/A                                                                                 | Memory complaints                                               | NS                                                                                                                                                                                                                                             | Age adjusted                                                                                                 | MMSE $\geq 26$                                                                           | Normal or close to normal                                                                                                            | N/A                                                               | NS                                                                                   |
| Kotani 2006   | N/A                                                                                 | Complaint of amnesia                                            | Total score on 12 indexes (Form A of the Repeatable Battery for the Assessment of Neuropsychological Status [RBANS; Japanese version]) derived from five domains: immediate & delayed memory, visuospatial/construction, language & attention) | 1.5SD                                                                                                        | NS                                                                                       | NS                                                                                                                                   | N/A                                                               | NINCDS-ADRDA & NINDS-AIREN                                                           |

| Reference     | CRD or other Global score                       | Memory Complaint                                      | Objective Deficit                                                                                                    | Cut-off                                                                         | Global Cognitive Function                                                        | ADL                                                                                                                             | Other                                                                                           | Dementia Diagnostic Criteria |
|---------------|-------------------------------------------------|-------------------------------------------------------|----------------------------------------------------------------------------------------------------------------------|---------------------------------------------------------------------------------|----------------------------------------------------------------------------------|---------------------------------------------------------------------------------------------------------------------------------|-------------------------------------------------------------------------------------------------|------------------------------|
| Mowla 2007    | CDR=0.5                                         | NS                                                    | NS                                                                                                                   | NS                                                                              | MMSE (age & education adjusted)                                                  | NS                                                                                                                              | N/A                                                                                             | DSM-IV                       |
| Petersen 2005 | CDR=0.5 (and at least 0.5 in the memory domain) | Memory complaint corroborated by an informant         | Paragraph Recall Logical Memory II WMS-R (Immediate & delayed recall score)                                          | 1.5-2SD (Education adjusted)                                                    | Clinical judgement based on CDR, MMSE $\geq$ 24 (ADAS-Cog also available)        | Clinical interview with the patient & informant (none or minimal)                                                               | Modified Hachinski Ischemia scale scores $\leq$ 4 & Hamilton Depression Rating Scales $\leq$ 12 | NINCDS-ADRDA criteria for AD |
| Rapp 2002     | N/A                                             | Self-reported (Memory Functioning Questionnaire, MFQ) | CERAD Battery (Verbal fluency, naming, constructional praxis, attention & concentration, executive function, memory) | $\leq$ 10th percentile (Scores on non-memory tests normal: $>$ 10th percentile) | MMSE $>$ 24                                                                      | Self-report of ADL/IADL impairment verified by an informant                                                                     | N/A                                                                                             | Self-report of a diagnosis   |
| Rozzini 2007  | CDR=0.5 (Memory box score 0.5 or 1)             | Memory complaint corroborated by an informant         | NS                                                                                                                   | NS                                                                              | Clinical judgement based on CDR=0.5 (Memory box score 0.5 or 1) & MMSE $\geq$ 24 | No or minimal ADL (including IADL & BADL) determined by clinical interview with patient & informant (reference Lawton and Katz) | Geriatric Depression Scale (GDS) $<$ 5                                                          | NINCDS-ADRDA criteria for AD |
| Scherder 2005 | N/A                                             | Subjective complaint supported by a nursing assistant | Memory items of the MMSE                                                                                             | NS                                                                              | 12-Item MMSE (Cut-off score $\geq$ 7)                                            | No decline in ADLs                                                                                                              | N/A                                                                                             | NINCDS-ADRDA criteria for AD |
| Sherwin 2011  | N/A                                             | Patient or caregiver report of memory problems        | Logical Memory 2 subtest of the Wechsler Memory Scale-Revised (WMS-R) and/or RAVLT-Delayed recall score              | 1SD (Age adjusted)                                                              | MMSE & ADAS-Cog                                                                  | Generally intact ADLs determined according to age                                                                               | The Clinician Interview-Based Impression of Change (CIBIC)                                      | NINCDS-ADRDA criteria for AD |

| Reference                  | CRD or other Global score                                                                                                                                                           | Memory Complaint                                                                                           | Objective Deficit                                                                                                                           | Cut-off                                                                                                                                                    | Global Cognitive Function                                        | ADL                                                                                                                                                                                                                            | Other                                                                                                 | Dementia Diagnostic Criteria                                                                      |
|----------------------------|-------------------------------------------------------------------------------------------------------------------------------------------------------------------------------------|------------------------------------------------------------------------------------------------------------|---------------------------------------------------------------------------------------------------------------------------------------------|------------------------------------------------------------------------------------------------------------------------------------------------------------|------------------------------------------------------------------|--------------------------------------------------------------------------------------------------------------------------------------------------------------------------------------------------------------------------------|-------------------------------------------------------------------------------------------------------|---------------------------------------------------------------------------------------------------|
| Smith 2010 & de Jager 2011 | Informant completed the IQCODE (short form), EQ-5D (Health Questionnaire) & informant CDR (subject also completed the CDR) [CDR=0.5]. Note: CDR was not used for MCI classification | Subjective concern, based on CAMDEX, that did not interfere with ADL that was corroborated by an informant | Telephone Interview of Cognitive Status-Modified (TICS-M) and CERAD Category Fluency (animals)                                              | 1.5SD. More specifically: 17-29 (/39) on TICS-M, or TICS-M>29 but fluency<19 or TICS-M word recall ≤10/20, or TIC-M<17 but fluency≥19 or word recall≥10/20 | MMSE>24                                                          | Normal ADL (5 questions relating to ADLs based on the Cambridge Behavioural Inventory: CBI)                                                                                                                                    | GDS                                                                                                   | DSM-IV                                                                                            |
| Thal 2005                  | CDR=0.5 (With memory domain score ≥0.5) & Blessed Dementia Rating Scale (BDRS)≤3.5 (no part 1 item score >0.5)                                                                      | Patient report of memory problem or informant report of decline in the past year                           | Auditory Verbal Learning Test (AVLT) total scores≤37                                                                                        | 1.5SD (on the AVLT, age-adjusted) for the first 6 months and then 1SD was used                                                                             | MMSE≥24                                                          | BDRS-CERAD. Informant based rating of patient's ability to perform ADLs (household tasks/self-care). Patients who scored >3.5 with any of the household-tasks part score >0.5 were excluded due to the possibility of dementia | Modified Hachinski Score>4, HDS (17-Item) version>13                                                  | NINCDS-ADRDA criteria for AD                                                                      |
| Troyer 2008                | N/A                                                                                                                                                                                 | New memory complaint corroborated by an informant                                                          | Hopkins Verbal Learning Test, WMS-Revised Verbal Paired Associates, Brief Visuospatial Memory Test and Rey-Osterreith Complex Figure Recall | Age, education & intellectual function adjusted (1-1.5SD)                                                                                                  | MMSE & the Dementia Rating Scale-II (Age and education adjusted) | No significant impairment in daily functioning determined by interview with the clinician (self & where possible informant interview)                                                                                          | Boston Naming Task, Digit Span, Rey-Osterreith Complex Figure Copy, TMT B (used for descriptive only) | Consideration of all MCI criteria and hinged on criterion of no significant functional impairment |

1  
2  
3  
4  
5  
6  
7  
8  
9  
10  
11  
12  
13  
14  
15  
16  
17  
18  
19  
20  
21  
22  
23  
24  
25  
26  
27  
28  
29  
30  
31  
32  
33  
34  
35  
36  
37  
38  
39  
40  
41  
42  
43  
44  
45  
46  
47  
48  
49

| Reference                     | CRD or other Global score      | Memory Complaint                                                                                                       | Objective Deficit                                                             | Cut-off                  | Global Cognitive Function                                      | ADL                                                                                                                        | Other | Dementia Diagnostic Criteria                                      |
|-------------------------------|--------------------------------|------------------------------------------------------------------------------------------------------------------------|-------------------------------------------------------------------------------|--------------------------|----------------------------------------------------------------|----------------------------------------------------------------------------------------------------------------------------|-------|-------------------------------------------------------------------|
| Van Uffelen 2007, 2008 & 2009 | N/A                            | Strawbridge cognition scale (answer 'yes' to 'do you have memory complaints', or at least twice answering 'sometimes') | 10 Word Learning Test delayed recall scores≤5 & percentage savings scores≤100 | 1SD                      | Telephone Interview for Cognitive Status (TICS)≥19 and MMSE≥24 | No report of disability in ADL on Groningen Activity Restriction Scale (GARS), except item 'taking care of hands and feet' | N/A   | Absence of dementia given the following cut-offs: TICS≥19+MMSE≥24 |
| Winblad 2008                  | CDR=0.5 (CDR memory score≥0.5) | A history of gradual onset and slow progression of declining cognitive ability                                         | New York University Paragraph Recall Test                                     | Delayed Recall Scores≤10 | CDR                                                            | Insufficient impairment in ADL to meet diagnostic criteria for dementia                                                    | N/A   | CDR≥1                                                             |

Peer review only

**Supplementary Table 1** Tasks used to assess the MCI criteria of “objective cognitive decline” (alphabetic order)

| Task                                                                                                                                     | References Used |
|------------------------------------------------------------------------------------------------------------------------------------------|-----------------|
| <b>Brief Visuospatial Memory Test[1] (BVMT)</b>                                                                                          | [2]             |
| <b>California Verbal Learning Test 2nd Edition (CVLT-II)[3]</b>                                                                          | [4]             |
| <b>Clinical Dementia Rating (CDR)[5] Memory Box Score</b>                                                                                | [6-8]           |
| – 0.5-1                                                                                                                                  |                 |
| – ≥0.5                                                                                                                                   |                 |
| <b>Clock Drawing Test (CDT)[9]</b>                                                                                                       | [4]             |
| <b>Consortium to Establish a Registry for Alzheimer’s Disease (CERAD) neuropsychological test-battery[10]</b>                            | [11-14]         |
| – Memory (immediate and delayed)                                                                                                         |                 |
| – Verbal/category fluency                                                                                                                |                 |
| – Naming                                                                                                                                 |                 |
| – Constructional praxis                                                                                                                  |                 |
| – Attention & concentration                                                                                                              |                 |
| – Recognition                                                                                                                            |                 |
| – Executive function                                                                                                                     |                 |
| – 10 Word list test                                                                                                                      |                 |
| <b>Delayed Story Recall</b>                                                                                                              | [15]            |
| – 44 information bits to recall immediately and after 20 minutes delay                                                                   |                 |
| <b>Hopkins Verbal Learning Test Revised (Brief Visuospatial Memory Test–Revised)[16 17]</b>                                              | [2 18 19]       |
| <b>Mattis Dementia Rating Scale (DRS)</b>                                                                                                | [18]            |
| – Memory subscale[20]                                                                                                                    |                 |
| <b>Mini Mental State Examination (MMSE) 12-Item short form[21]</b>                                                                       | [22]            |
| – Memory items                                                                                                                           |                 |
| <b>Repeatable battery for assessment of neuropsychological status (RBANS)[23] [Japanese version] (see[24] for the specific subtests)</b> | [25]            |
| – Immediate and delayed memory                                                                                                           |                 |
| – Visuospatial/construction, language and attention                                                                                      |                 |
| <b>Rey Auditory Verbal Learning Test (RAVLT)[26]</b>                                                                                     | [8 19 27]       |
| <b>Rey-Osterreith Complex Figure Recall[28]</b>                                                                                          | [2]             |
| <b>Semantic and Phonemic Verbal Fluency</b>                                                                                              | [4]             |
| – Animal naming[9]                                                                                                                       |                 |
| <b>Trail Making Test (TMT) of the Delis-Kaplan Executive Function System (D-KEFS)[29]</b>                                                | [4]             |
| <b>Wechsler Memory Scale-Revised (WMS-R)[30]</b>                                                                                         | [2 27]          |
| – Logical Memory II Subtest                                                                                                              |                 |
| – Verbal Paired Associates                                                                                                               |                 |
| <b>Wechsler Memory Scale–III[31]</b>                                                                                                     | [6 18 19 32 33] |
| – Logical Prose Passages                                                                                                                 |                 |
| – Word List Learning                                                                                                                     |                 |
| – Verbal Paired Associates                                                                                                               |                 |
| – Logical Memory (II) Immediate recall and delayed paragraph recall                                                                      |                 |
| <b>New York University (NYU) Paragraph recall test</b>                                                                                   | [7]             |
| – Delayed recall score                                                                                                                   |                 |
| <b>Telephone interview of cognitive status-modified (TICS-M)[34]</b>                                                                     | [13]            |

## Table References

1. Benedict RHB. *Brief Visuospatial Memory Test - Revised* Lutz, FL: Psychological Assessment Resources, 1997.
2. Troyer AK, Murphy KJ, Anderson ND, et al. Changing everyday memory behaviour in amnesic mild cognitive impairment: A randomised controlled trial. *Neuropsychological Rehabilitation* 2008;**18**(1):65-88
3. Delis D, Kramer J, Kaplan E, et al. *California Verbal Learning Test: Adult version manual*. San Antonio, TX: The Psychological Corporation, 1987.
4. Jean L, Simard M, Wiederkehr S, et al. Efficacy of a cognitive training programme for mild cognitive impairment: Results of a randomised controlled study. *Neuropsychological Rehabilitation* 2010;**20**(3):377-405
5. Hughes CP, Berg L, Danziger WL, et al. A new clinical scale for the staging of dementia. *Br J Psychiatry* 1982;**140**:566-72
6. Doody RS, Ferris SH, Salloway S, et al. Donepezil treatment of patients with MCI: A 48-week randomized, placebo-controlled trial. *Neurology* 2009;**72**(18):1555-61
7. Winblad B, Gauthier S, Scinto L, et al. Safety and efficacy of galantamine in subjects with mild cognitive impairment. *Neurology* 2008;**70**(22):2024-35
8. Thal LJ, Ferris SH, Kirby L, et al. A randomized, double-blind, study of rofecoxib in patients with mild cognitive impairment. *Neuropsychopharmacology* 2005;**30**(6):1204-15
9. Strauss E, Sherman EMS, Spreen O. *A Compendium of Neuropsychological Tests: Administration, Norms, and Commentary*. New York, NY: Oxford University Press, 2006.
10. Morris JC, Heyman A, Mohs RC, et al. The Consortium to Establish a Registry for Alzheimer's Disease (CERAD). Part I. Clinical and neuropsychological assessment of Alzheimer's disease. *Neurology* 1989;**39**(9):1159-65
11. Buschert VC, Friese U, Teipel SJ, et al. Effects of a newly developed cognitive intervention in amnesic mild cognitive impairment and mild Alzheimer's disease: a pilot study. *J Alzheimers Dis* 2011;**25**(4):679-94
12. Rapp S, Brenes G, Marsh AP. Memory enhancement training for older adults with mild cognitive impairment: A preliminary study. *Aging and Mental Health* 2002;**6**(1):5-11
13. Smith AD, Smith SM, de Jager CA, et al. Homocysteine-lowering by b vitamins slows the rate of accelerated brain atrophy in mild cognitive impairment: A randomized controlled trial. *PLoS ONE* 2010;**5**(9):1-10
14. Van Uffelen JGZ, Hopman-Rock M, Chin A Paw MJM, et al. Protocol for Project FACT: A randomised controlled trial on the effect of a walking program and vitamin B supplementation on the rate of cognitive decline and psychosocial wellbeing in older adults with mild cognitive impairment [ISRCTN19227688]. *BMC Geriatrics* 2005;**5**(18):doi:10.1186/471-2318-5-18
15. Craft S, Baker LD, Montine TJ, et al. Intranasal insulin therapy for Alzheimer disease and amnesic mild cognitive impairment: a pilot clinical trial. *Arch Neurol* 2012;**69**(1):29-38
16. Benedict RHB, Schretlen D, Groninger L, et al. Hopkins Verbal Learning Test Revised: Normative Data and Analysis of Inter-Form and Test-Retest Reliability. *The Clinical Neuropsychologist (Neuropsychology, Development and Cognition: Sec* 1998;**12**(1):43-55
17. Brandt J, Benedict RHB. *Hopkins verbal learning test—revised*. Lutz: Psychological Assessment Resources, 2001.
18. Chen X, Magnotta VA, Duff K, et al. Donepezil effects on cerebral blood flow in older adults with mild cognitive deficits. *J Neuropsychiatry Clin Neurosci* 2006;**18**(2):178-85
19. Kinsella GJ, Mullaly E, Rand E, et al. Early intervention for mild cognitive impairment: a randomised controlled trial. *Journal of Neurology, Neurosurgery & Psychiatry* 2009;**80**(7):730-36
20. Lucas JA, Ivnik RJ, Smith GE, et al. Normative data for the Mattis Dementia Rating Scale. *J Clin Exp Neuropsychol* 1998;**20**(4):536-47

- 1
- 2
- 3 21. Braekhus A, Laake K, Engedal K. The Mini-Mental State Examination: identifying the most
- 4 efficient variables for detecting cognitive impairment in the elderly. *J Am Geriatr Soc*
- 5 1992;**40**(11):1139-45
- 6
- 7 22. Scherder EJ, Van Paasschen J, Deijen JB, et al. Physical activity and executive functions in the
- 8 elderly with mild cognitive impairment. *Aging Ment Health* 2005;**9**(3):272-80
- 9
- 10 23. Randolph C. *Repeatable Battery for the Assessment of Neuropsychological Status (RBANS)*. San
- 11 Antonio: Harcourt, TX: The Psychological Corporation, 1998.
- 12
- 13 24. Randolph C, Tierney MC, Mohr E, et al. The Repeatable Battery for the Assessment of
- 14 Neuropsychological Status (RBANS): preliminary clinical validity. *J Clin Exp Neuropsychol*
- 15 1998;**20**(3):310-9
- 16
- 17 25. Kotani S, Sakaguchi E, Warashina S, et al. Dietary supplementation of arachidonic and
- 18 docosahexaenoic acids improves cognitive dysfunction. *Neurosci Res* 2006;**56**(2):159-64
- 19
- 20 26. Schmidt M. *Rey Auditory and verbal learning test: a handbook*. Los Angeles: Western
- 21 Psychological Services, 1996.
- 22
- 23 27. Sherwin BB, Chertkow H, Schipper H, et al. A randomized controlled trial of estrogen treatment
- 24 in men with mild cognitive impairment. *Neurobiol Aging* 2011;**32**(10):1808-17
- 25
- 26 28. Spreen O, Strauss EA. *Compendium of neuropsychological tests. Administration, norms and*
- 27 *commentary (2nd ed.)*. New York: Oxford University Press, 1998.
- 28
- 29 29. Delis DC, Kaplan E, Kramer JH. *The Delis-Kaplan Executive Function System*. San Antonio, TX: The
- 30 Psychological Corporation, 2001.
- 31
- 32 30. Wechsler D. *Wechsler Memory Scale-Revised*. San Antonio, TX: The Psychological Corporation,
- 33 1987.
- 34
- 35 31. Wechsler D. *Wechsler Memory Scale-III*. San Antonio, TX: Psychological Corp, 1997.
- 36
- 37 32. Chiu CC, Su KP, Cheng TC, et al. The effects of omega-3 fatty acids monotherapy in Alzheimer's
- 38 disease and mild cognitive impairment: a preliminary randomized double-blind placebo-
- 39 controlled study. *Prog Neuropsychopharmacol Biol Psychiatry* 2008;**32**(6):1538-44
- 40
- 41 33. Petersen RC, Thomas RG, Grundman M, et al. Vitamin E and donepezil for the treatment of mild
- 42 cognitive impairment. *N Engl J Med* 2005;**352**(23):2379-88
- 43
- 44 34. de Jager CA, Budge MM, Clarke R. Utility of TICS-M for the assessment of cognitive function in
- 45 older adults. *Int J Geriatr Psychiatry* 2003;**18**(4):318-24
- 46
- 47
- 48
- 49
- 50
- 51
- 52
- 53
- 54
- 55
- 56
- 57
- 58
- 59
- 60

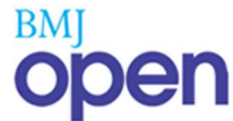

## Diagnosing Mild Cognitive Impairment (MCI) in Clinical Trials: A Systematic Review

|                                 |                                                                                                                                                                                                                                                                                                                                                                                                                                                   |
|---------------------------------|---------------------------------------------------------------------------------------------------------------------------------------------------------------------------------------------------------------------------------------------------------------------------------------------------------------------------------------------------------------------------------------------------------------------------------------------------|
| Journal:                        | <i>BMJ Open</i>                                                                                                                                                                                                                                                                                                                                                                                                                                   |
| Manuscript ID:                  | bmjopen-2012-001909.R1                                                                                                                                                                                                                                                                                                                                                                                                                            |
| Article Type:                   | Research                                                                                                                                                                                                                                                                                                                                                                                                                                          |
| Date Submitted by the Author:   | 05-Nov-2012                                                                                                                                                                                                                                                                                                                                                                                                                                       |
| Complete List of Authors:       | Stephan, Blossom; Newcastle University, Institute of Health and Society<br>Minett, Thais; Cambridge University, Department of Public Health and Primary Care<br>Pagett, Emma; Cambridge University, Department of Public Health and Primary Care<br>Siervo, Mario; Newcastle University, Institute of Ageing<br>Brayne, Carol; University of Cambridge, Public Health and Primary Care<br>McKeith, Ian; Newcastle University, Institute of Ageing |
| <b>Primary Subject Heading</b>: | Neurology                                                                                                                                                                                                                                                                                                                                                                                                                                         |
| Secondary Subject Heading:      | Neurology, Geriatric medicine                                                                                                                                                                                                                                                                                                                                                                                                                     |
| Keywords:                       | Dementia < NEUROLOGY, MENTAL HEALTH, NEUROLOGY                                                                                                                                                                                                                                                                                                                                                                                                    |
|                                 |                                                                                                                                                                                                                                                                                                                                                                                                                                                   |

SCHOLARONE™  
Manuscripts



## Diagnosing Mild Cognitive Impairment (MCI) in Clinical Trials: A Systematic Review

Blossom Christa Maree Stephan<sup>1\*</sup>, Thais Minett<sup>2</sup>, Emma Pagett<sup>2</sup>, Mario Siervo<sup>3</sup>, Carol Brayne<sup>2</sup> & Ian G McKeith<sup>3</sup>

1. Institute of Health and Society, Newcastle University, UK
2. Department of Public Health and Primary Care, Cambridge University, UK
3. Institute of Ageing, Newcastle University, UK

**\*Corresponding Author:**

**Blossom Christa Maree Stephan**

Institute of Health and Society

Newcastle University

The Baddiley-Clark Building

Richardson Road

Newcastle upon Tyne

NE2 4AX

United Kingdom

Ph + 44 (0)191 222 3811

### Article Type Systematic Review

**Word Count** 3,075 (Excluding the Abstract and References)

**Summary** 98

**References** 72

**Figures** 2

**Supplementary Material** 2 Tables

**Keywords** Mild Cognitive Impairment (MCI), Randomised Controlled Trials, Operationalisation, Systematic Review

**ABSTRACT**

**Objective** To describe how criteria for amnesic Mild Cognitive Impairment (aMCI) have been operationalised in randomised controlled clinical trials (RCTs).

**Design** Systematic review.

**Information Sources** EMBASE, PubMed and PSYCHInfo were searched from their inception to February 2012. Electronic clinical trial registries were also searched (February 2012).

**Study Selection** RCTs were included where participant selection was made using Petersen et al (1999) defined aMCI. There was no restriction on intervention type or the outcome tested.

**Data Extraction** For each trial we extracted information on study design, demographics, exclusion criteria and the operationalisation strategy for the five aMCI diagnostic criterion including: (1) memory complain, (2) normal general cognitive function, (3) memory impairment, (4) no functional impairment and (5) no dementia.

**Results** 223 articles and 278 registered trials were reviewed of which 22 met inclusion criteria. Various methods were applied for operationalising aMCI criteria resulting in variability in participant selection. Memory complaint and assessment of general cognitive function were the most consistently measured criteria. There was large heterogeneity in the neuropsychological methods used to determine memory impairment. It was not possible to assess the impact of these differences on case selection accuracy for dementia prediction. Further limitations include selective and unclear reporting of how each of the criteria was measured.

1  
2  
3  
4 **Conclusion** The results highlight the urgent need for a standardised approach to  
5 mapping aMCI. Lack of uniformity in clinical diagnosis however is not exclusively a  
6  
7 problem for MCI but also for other clinical states such as dementia including  
8  
9 Alzheimer’s disease and vascular dementia. Defining a uniform approach to MCI  
10  
11 classification, or indeed for any classification concept within the field of dementia,  
12  
13 should be a priority if further trials are to be undertaken in the older aged population  
14  
15 based on these concepts.  
16  
17  
18  
19  
20  
21  
22  
23  
24  
25  
26  
27  
28  
29  
30  
31  
32  
33  
34  
35  
36  
37  
38  
39  
40  
41  
42  
43  
44  
45  
46  
47  
48  
49  
50  
51  
52  
53  
54  
55  
56  
57  
58  
59  
60

## ARTICLE SUMMARY

### Article focus

- Accurate identification of individuals with preclinical dementia is important for clinical trial enrolment.
- Diagnosis of preclinical cases is usually made using the amnesic form of Mild Cognitive Impairment (aMCI). While specific criteria for implementation exist there is no operationalisation protocol.
- Research Question: How have criteria for aMCI been operationalised in randomised controlled clinical trials?

### Key messages

- Various methods have been applied for operationalising aMCI criteria in randomised controlled clinical trials resulting in variability in participant selection.
- The results highlight the urgent need for a standardised approach to mapping aMCI.
- Lack of specific methods for clinical diagnosis is not a problem unique to the field of MCI. Across studies there continues to be inconsistency in the instruments and methodology used to diagnose Alzheimer's disease and Vascular Dementia, including its prodromal stage, Vascular Cognitive Impairment no Dementia (VCIND). Revision of diagnostic criteria including standardisation of methods and instruments for operationalisation of each dementia subtype and for the different disease stages (e.g., prodromal, preclinical and clinical) should be a research priority.

**Strengths and limitations**

- The review focuses on preclinical dementia defined using aMCI. However, not all clinical trials on preclinical cognitive states have used this definition of MCI.
- We chose to focus on aMCI as this is one of the commonly applied definitions in clinical and research practice.

## INTRODUCTION

As new preventative strategies for dementia are developed, methods to select persons accurately for clinical trial involvement will be needed. In this perspective, Mild Cognitive Impairment (MCI), an intermediate state between normal ageing and dementia has become a focus for trials to prevent or delay progression to Alzheimer's Disease. The expectation is that positive results are more likely to be achieved with earlier treatment initiation<sup>1,2</sup>. While several different definitions exist for MCI, Petersen et al<sup>3,4</sup> defined amnesic Mild Cognitive Impairment (aMCI) is often used in clinical and research practice. However, despite being commonly applied, no standardised method for the operationalisation of each of the five component criteria (Figure 1) necessary for an aMCI diagnosis exists, resulting in heterogeneity in diagnostic methods and case ascertainment across studies. Indeed, there are numerous possibilities for the measurement of the five criteria as highlight in Figure 1. The lack of an established diagnostic methodology for identifying cases for clinical trial enrolment is problematic as study specific participant selection raises questions regarding the nature of the sample selected, whilst also making cross study comparison and generalizability of findings difficult.

We undertook a systematic review to explore the methods used to classify aMCI cases, defined using Petersen et al<sup>3</sup> criteria, in randomised controlled clinical trials (RCTs). The focus was on inclusion criteria and variation in the operationalisation of each of the five aMCI component criteria as outlined in Figure 1.

## METHODS

This review has been undertaken with adherence to the PRISMA statement<sup>5</sup>. The review protocol is available on request.

### Search Strategy

EMBASE (including Medline) and PSYCHInfo were searched using the following keywords and using Medical Subject Heading (MeSH) terms: ("mild cognitive impairment" OR MCI) AND ("randomised controlled trial" OR "randomized controlled trial" OR RCT). Articles were searched from inception to 6 June 2011, with the search updated on 21 February 2012. Web based searches, using the term 'mild cognitive impairment' were also undertaken in the ISRCTR trial registry (<http://www.controlled-trials.com>) and on [www.clinicaltrials.gov](http://www.clinicaltrials.gov) (17 February 2012).

Only studies that were published in English were included. Two investigators (BS and TM) independently searched publications using the following inclusion criteria: (1) the study was a RCT; (2) the trial had been completed (was not on-going or terminated) and results published; (3) the authors report selecting participants using the definition of aMCI as reported in Petersen et al (1999), and could include single or multi-domain amnesic MCI subtypes (amendments to criteria were allowed as long as stated and Petersen et al (1999) was referenced); and, (4) the MCI group was analysed separately to the dementia or control groups. The protocol paper or the first publication reporting the primary outcome was selected in case of multiple publications using the same study sample. Titles and abstracts were searched first, followed by the full text of any identified articles. Reviews were also retained and

1  
2  
3  
4 the reference lists of these and each included paper were interrogated.

5  
6 Disagreements were resolved by consensus. Data quality was not assessed as all  
7  
8 included studies were RCTs.  
9  
10

### 11 12 13 **Data Extraction**

14  
15 Data on the lead author, date of publication, study design (country, site, sampling  
16  
17 framework, duration, intervention), demographics (age and gender distributions),  
18  
19 trial exclusion criteria, dementia progression rates, outcomes tested and the  
20  
21 methods used to operationalised each of the five component criterion for the  
22  
23 diagnosis of aMCI were abstracted by two investigators (EP and TM) and checked by  
24  
25 a third (MS).  
26  
27  
28  
29  
30  
31

### 32 33 **RESULTS**

34  
35 A total of 223 articles were identified from the literature search. From the electronic  
36  
37 search 11 trials were identified from the ISRCTR trial registry and 267 from  
38  
39 [www.clinicaltrials.gov](http://www.clinicaltrials.gov). Based on the title-abstract search 84 articles were identified  
40  
41 for full text review. In total, 22 articles met inclusion criteria and were retained for  
42  
43 this review. Figure 2 shows the selection process using the PRISMA (2009) Flow  
44  
45 Diagram. As shown in Figure 2, articles were mainly excluded as the sample did not  
46  
47 appear to be defined using the Petersen et al 1999 criteria or had inadequate details  
48  
49 to support the use of Petersen et al 1999 criteria (e.g., only stated an objective  
50  
51 cognitive deficit), or the article was a review. Supplementary Table 1a summarises  
52  
53 the general characteristics, demographics and outcomes tested in each included  
54  
55  
56  
57  
58  
59  
60



1  
2  
3  
4 article. Supplementary Table 1b summarises the operationalisation protocol used for  
5  
6 identifying aMCI cases in each trial.  
7  
8

9  
10  
11 Trial exclusion criteria varied, but mainly related to cerebrovascular and  
12  
13 cardiovascular disease or health and psychiatric related conditions that could be  
14  
15 associated with cognitive decline. There were also differences in the population  
16  
17 sampled (clinic vs. community), site (single vs. multi-centre), duration (e.g., 90 days  
18  
19 to 4 years), and sample demographics (e.g., age range: 50-90 years). Interventions  
20  
21 included pharmacological agents and supplementation<sup>6-17</sup> (including: donepezil,  
22  
23 galantamine, rofecoxib, fluoxetine, lithium treatment, estrogen treatment [E<sub>2</sub>],  
24  
25 vitamin supplementation (E and B), and supplementation with omega-3 poly  
26  
27 unsaturated fatty acids, arachidonic and docosahexaenoic acids), insulin therapy<sup>18</sup>,  
28  
29 physical activity<sup>19, 20</sup> (e.g., aerobic exercise), cognitive training/rehabilitation  
30  
31 programmes<sup>21-25</sup> (e.g., memory training, strategy learning) and combined therapies  
32  
33 including cholinesterase inhibitor (ChEI) use combined with a cognitive training  
34  
35 program<sup>26</sup>, and physical activity combined with vitamin B supplementation<sup>27</sup>.  
36  
37

38  
39 Outcomes varied extensively across studies and included assessment of cognitive  
40  
41 function (in all studies either as a primary or secondary outcome, with no  
42  
43 neuropsychological assessment applied consistently) in addition to non-cognitive  
44  
45 measures (e.g., vascular health such as blood pressure, quality of life, depression,  
46  
47 cerebrospinal fluid (CSF) biomarkers of Alzheimer's Disease pathology and  
48  
49 neuroimaging). Only five studies reported dementia progression rates all of which  
50  
51  
52  
53  
54  
55  
56  
57  
58  
59  
60

1  
2  
3  
4 varied: 16%/year<sup>9</sup>, 5-6%/year<sup>11</sup>, 24% over one year<sup>16</sup>, 11.9% over a 24-weeks trial<sup>17</sup>  
5  
6  
7 and 15% over four years<sup>12</sup>. Most results were negative.  
8  
9

### 10 11 **Operationalizing MCI Component Criterion**

12  
13  
14 Two studies<sup>16, 19</sup> did not report details of the operationalization protocol for defining  
15  
16 MCI.  
17

#### 18 19 **Criterion 1: Memory Complaint**

20  
21  
22 Five studies<sup>7, 8, 16, 18, 19</sup> reported no details on how memory complaint was obtained.  
23  
24 The memory complaint was obtained from the subject in four<sup>15, 21, 22, 27</sup> studies while  
25  
26 eleven studies<sup>6, 9-11, 13, 14, 17, 20, 23, 24, 26</sup> utilised subject report and informant  
27  
28 corroboration. One study<sup>25</sup> gave unclear details on who reported the complaint. In  
29  
30 one study<sup>12</sup> this criterion was operationalised using a history of gradual onset and  
31  
32 slow progressive decline in cognitive function, but how this was reported, for  
33  
34 example from the subject or informant was not stated. Three studies<sup>10, 22, 27</sup> used  
35  
36 specific scales rather than a single question to assess memory complaint. Smith et  
37  
38 al<sup>10</sup> used four items from the Cambridge Examination for Mental Disorders  
39  
40 (CAMDEX)<sup>28</sup>. Rapp et al<sup>22</sup> used the Memory Functioning Questionnaire (MFQ)<sup>29</sup>  
41  
42 which is a 64-item questionnaire assessing memory problems and use of mnemonics.  
43  
44 Van Uffelen et al<sup>27</sup> used a positive response to a single item “do you have memory  
45  
46 complaints?” or answering “sometimes” at least twice on the cognition scale of  
47  
48 Strawbridge<sup>30</sup>.  
49  
50  
51  
52  
53  
54  
55  
56  
57  
58  
59  
60

**Criterion 2: General Cognitive Function**

This criterion was the most consistently measured and was typically operationalised using the Mini Mental State Examination (MMSE)<sup>31</sup> score either alone<sup>6-8, 10, 11, 22</sup> or in combination with other measures including: a structured interview with the patient and informant<sup>24</sup>, the Dementia Rating Scale-II<sup>32</sup> (DRS-II)<sup>23</sup>, the Mattis Dementia Rating Scale (DRS)<sup>33</sup> (total score)<sup>14</sup>, the Telephone Interview for Cognitive Status<sup>34</sup> (TICS)<sup>27</sup>, the Clinic Dementia Rating<sup>35</sup> (CDR) score<sup>9, 26</sup> or the Alzheimer's Disease Assessment Scale-Cognitive Subscale<sup>36</sup> (ADAS-Cog) in addition with the Clinician Interview-Based Impression of Change<sup>37</sup> (CIBIC)<sup>17</sup>. One study used only the CDR score of 0.5<sup>12</sup>.

The cut-off chosen for the MMSE varied from 23 to 26. Most studies used a cut-off value of  $\geq 24$ <sup>6, 9-11, 22, 26, 27</sup>, but  $\geq 26$ <sup>7</sup>,  $\geq 23$ <sup>25</sup>, or a score adjusted for age/education<sup>8, 23</sup>, were also used. In one study<sup>6</sup>, the protocol was modified during recruitment and the cut-off was adjusted from 24-30 to 24-28. One study<sup>20</sup> used a 12-Item shortened MMSE with a cut-off score of  $\geq 7$ . Three studies<sup>14, 17, 24</sup> specified the use of the MMSE but did not report a cut-off score. Six studies did not specify operationalisation of this criterion<sup>13, 15, 16, 18, 19, 21</sup>.

**Criterion 3: Object Memory Decline**

Five studies did not specify operationalisation of this criterion<sup>7, 8, 16, 19, 26</sup>. Numerous different tests were used to assess cognition as shown in Supplementary Table 2. In addition to inconsistency in test selection there was no consistency in impairment

1  
2  
3  
4 severity (e.g., 1 standard deviation (SD), 1.5SDs or 2SDs below the mean). Further, it  
5  
6 was not always stated whether cut-off scores for impairment were adjusted for age,  
7  
8 education or pre-morbid ability. In one study<sup>11</sup>, severity was adjusted from 1.5SDs  
9  
10 below the mean (used in the first 6 months) to 1SD below the mean during the  
11  
12 course of screening. Based on the nature of the objective deficit, three studies<sup>14, 21, 24</sup>  
13  
14 reported inclusion of single amnesic or multi-domain amnesic MCI. One study<sup>10</sup>  
15  
16 reported the use of combined amnesic and non-amnesic (single and multi-domain)  
17  
18 cases.  
19  
20  
21  
22  
23  
24

25  
26 In terms of non-memory performance one study<sup>22</sup> reported that this was tested and  
27  
28 required to be unimpaired (defined using a cut-off >10<sup>th</sup> percentile). Another<sup>13</sup>  
29  
30 reported that performance was required to be relatively normal in non-memory  
31  
32 domains. In one study<sup>15</sup> division of cases was unclear; the objective deficit in this  
33  
34 study was defined as impairment on a total score comprising five domains  
35  
36 (immediate & delayed memory, visuospatial/construction, language & attention)  
37  
38 assessed using the Repeatable Battery for the Assessment of Neuropsychological  
39  
40 Status (RBANS)<sup>38</sup>.  
41  
42  
43  
44  
45  
46

#### 47 **Criterion 4: ADL/IADL**

48  
49 Seven studies did not specify operationalisation of this criterion<sup>6, 8, 13, 16, 19</sup>. In twelve  
50  
51 studies<sup>7, 9, 11, 12, 15, 17, 18, 21, 23-27</sup>, minimal or non-significant functional impairment was  
52  
53 allowed. One study required that in MCI cases that had a MMSE score between 23  
54  
55 and 25, cognitive impairments did not significantly interfere with daily activities or  
56  
57  
58  
59  
60

1  
2  
3  
4 social functioning, determined by a caregiver report<sup>25</sup>. This restriction was not  
5  
6 required in MCI cases with a MMSE score  $\geq 26$ .  
7  
8

9  
10  
11 Functional impairment tended to be assessed by self or informant report of difficulty  
12  
13 with ADLs or Basic ADLs. Specific scales were used for functional assessment in some  
14  
15 studies<sup>10, 11, 21, 26, 27</sup> including: the Functional Autonomy Measurement System<sup>39</sup>  
16  
17 (SMAFQ), the Blessed Dementia Rating Scale-CERAD<sup>40</sup> version, the Groningen Activity  
18  
19 Restriction Scale<sup>41</sup> (GARS) and selected items from the Lawton<sup>42</sup> and Katz<sup>43</sup> scales or  
20  
21 items from the Cambridge Behavioural Inventory<sup>44</sup> (CBI). In only two studies did it  
22  
23 appear that no evidence of any functional impairment was allowed; one<sup>10</sup> based on 5  
24  
25 items related to ADLs from the CBI and another<sup>20</sup> specified no decline in ADLs  
26  
27 without their measurement being specified.  
28  
29  
30  
31  
32  
33  
34

### 35 **Criterion 5: Dementia Diagnosis**

36  
37 Three studies did not specify operationalization of this criterion<sup>7, 14, 19</sup>. Fourteen<sup>6, 8-11,</sup>  
38  
39 <sup>13, 15, 17, 18, 20, 21, 24-26</sup> studies used the Diagnostic and Statistical Manual (DSM-III-R/IV-  
40  
41 TR/-IV)<sup>45, 46</sup>, National Institute of Neurological and Communicative Disorders and  
42  
43 Stroke and the Alzheimer's Disease and Related Disorders Association (NINCDS-  
44  
45 ADRDA)<sup>47</sup> criteria or National Institute of Neurological Disorders and Stroke and  
46  
47 Association Internationale pour la Recherche et l'Enseignement en Neurosciences  
48  
49 (NINCDS-AIREN)<sup>48</sup> criteria. Two studies used the CDR score<sup>12, 16</sup> and one each used a  
50  
51 self-report of a diagnosis<sup>22</sup>, clinical judgement<sup>23</sup> or the TICS combined with a MMSE  
52  
53 score  $< 24$ <sup>27</sup>.  
54  
55  
56  
57  
58  
59  
60

### ***Additional Measures***

In some studies, additional measures, generally related to the assessment of global functioning (such as the CDR sum of boxes score) or dementia severity (e.g., from none, mild, moderate and severe) were made in parallel to the mapping of the five aMCI criteria. For example, two studies<sup>19, 21</sup> administered the Dementia Rating Scale (DRS), seven<sup>6, 8-12, 26</sup> the CDR, one<sup>11</sup> the Blessed Dementia Rating Scale<sup>40</sup> (BDRS), one<sup>17</sup> the CIBIC, and one<sup>25</sup> the Global Deterioration Scale<sup>49</sup> (GDS). One study<sup>10, 50</sup> also had informants complete both the Informant Questionnaire on Cognitive Decline in the Elderly<sup>51</sup> (IQCODE-Short form) and EuroQol<sup>52</sup> (EQ-5D), a measure of health status.

### **DISCUSSION**

This review highlights the lack of consistency in MCI case ascertainment in currently completed RCTs. How MCI was diagnosed was not always reported or clear and varying operationalisation protocols make it impossible to determine similarity across the samples recruited in the different trials. No recruitment protocol for the selection of MCI cases for future clinical trials can be recommended until classification accuracy of current methods is tested.

The review highlights the continuing challenge of classifying and operationalising the current Petersen et al (1999) definition of aMCI. Without a standard operationalisation protocol for defining aMCI trial recruitment will continue to be variable. Indeed, within the field of dementia there is a lack of consistency in

1  
2  
3  
4 operationalisation protocols not only for aMCI, but its associated disorders (e.g.,  
5  
6 Cognitive Impairment no Dementia<sup>53</sup>), dementia and its sub-types (such as  
7  
8 Alzheimer's Disease and vascular dementia), pre-MCI<sup>54</sup> and other preclinical states  
9  
10 such as VCIND<sup>55</sup>. Different diagnostic criteria for MCI affect prevalence<sup>56</sup> and  
11  
12 progression<sup>57</sup>. Similarly for dementia different criteria have been found to affect  
13  
14 prevalence<sup>58,59</sup>. Inconsistency in case classification can have implications for research  
15  
16 and trial recruitment and outcomes.  
17  
18  
19

20  
21  
22  
23 With regard to MCI, consensus needs to be reached on five core issues relating to  
24  
25 the measurement of each of the component criteria. First, whether memory  
26  
27 complaint should be self and/or informant reported and how it should be assessed  
28  
29 (e.g., single or multiple items). Second, how global cognitive function should be  
30  
31 assessed with possible measures including the MMSE, CDR and Global Deterioration  
32  
33 Scale, and what the best cut-off score is (within and across cultures). Third, which  
34  
35 neuropsychological test(s) should be used to assess memory<sup>60</sup>, what should be the  
36  
37 severity of cognitive impairment (1SD, 1.5SD) and whether covariate adjustment is  
38  
39 needed. In addition, is the question of whether both memory and non-memory  
40  
41 domains should be tested. Possible tests identified in this review are outlined in  
42  
43 Supplementary Table 2. Fourth, how functional performance should be assessed (the  
44  
45 type of questions), the nature of the task (e.g., instrumental ADLs, basic ADLs),  
46  
47 reporting (e.g., patient, informant or clinician) and what is the maximum level of  
48  
49 impairment (e.g., none, mild, moderate or severe difficulty or significant difficulty in  
50  
51 some areas but not in others). Fifth, how dementia should be defined for exclusion  
52  
53  
54  
55  
56  
57  
58  
59  
60

1  
2  
3  
4 with examples used including: the DSM or NINCDS-ADRDA criteria, the CDR sum of  
5  
6 boxes score  $\geq 1$  or via screening instruments (e.g., the Telephone Screening  
7  
8 Instrument). It should be noted that aMCI is not always operationalised as originally  
9  
10 specified (e.g., permissible significant functional impairment in some studies) and  
11  
12 consensus needs to be reached on whether all five criterion are necessary. Further,  
13  
14 whether modifications (if any) to criteria can be made and the implications of making  
15  
16 modifications, for example, in terms of dementia predictability and effect on  
17  
18 generalizability, needs to be established.  
19  
20  
21  
22  
23

24  
25 Decision also needs to be reached on the best treatment target. The impairment  
26  
27 captured in aMCI is not always progressive, with a proportion of cases reverting to  
28  
29 normal or remaining stable at follow-up, particularly when mapped in population-  
30  
31 based studies<sup>57,61</sup>. Indeed, symptoms of MCI are not always a consequence of  
32  
33 Alzheimer's pathology, but rather can have multiple aetiologies such as depression  
34  
35 or vascular disease each with different outcomes (e.g., dementia progression,  
36  
37 improvement with treatment for the underlying health symptoms)<sup>62,63</sup>. Better  
38  
39 methods are needed to determine the underlying cause of disease in this patient  
40  
41 group to accurately identify those individuals whose MCI is associated with  
42  
43 Alzheimer's Disease. One possibility could be defining aMCI as in the Alzheimer's  
44  
45 Disease Cooperative Study trial<sup>9</sup> (based on a subjective memory complaint, MMSE  
46  
47 score, impaired performance on the Logical Memory II Subscale, no functional  
48  
49 impairment and a CDR score of 0.5) as implementation of this methodology has been  
50  
51 found to result in a consistent rate of dementia progression (approximately  
52  
53  
54  
55  
56  
57  
58  
59  
60



1  
2  
3  
4 16%/year) across studies, including the multicentre Alzheimer's Disease  
5  
6  
7 Neuroimaging Initiative<sup>64</sup>. Further research is needed to test this method of  
8  
9 operationalisation across cohorts (clinical and population based; across countries)  
10  
11 and calculate prevalence and longitudinal course in order to determine  
12  
13 generalisability of these findings.  
14  
15

16  
17  
18 A recent task force on designing trials in early (pre-dementia) AD argues for the use  
19  
20 of aMCI criteria in combination with biomarkers to improve case selection for clinical  
21  
22 trials<sup>2, 65</sup>. Suggestions for possible biomarkers have included hippocampal or whole  
23  
24 brain atrophy, CSF A $\beta$ 42 levels, PiB imaging, genetic screening (APOE e4 status) or  
25  
26 behavioural deficits<sup>66-68</sup>, as each has been associated with dementia. Further, how  
27  
28 dementia and AD are defined is currently undergoing revision, with the aim of  
29  
30 improved stratification of patients<sup>65, 69</sup>. Where MCI now sits in the ever changing  
31  
32 "lexicon" of AD (i.e., given there is currently no concrete border between preclinical  
33  
34 and clinical disease) will have implications for who is targeted for clinical trial  
35  
36 recruitment. For example, MCI as defined by Petersen criteria may no longer be  
37  
38 considered at-risk, but as already AD, and encompassed in the new term "prodromal  
39  
40 AD"; an early symptomatic stage pre-dementia where a patient shows evidence of  
41  
42 memory impairment and positive ratings on pathophysiological and topographical  
43  
44 markers of AD<sup>65</sup>. Clinical trial research may therefore shift some focus to  
45  
46 asymptomatic at-risk states (e.g., pre-MCI) where individuals are biomarker positive  
47  
48 for AD but are otherwise healthy. However, like aMCI efforts are needed to  
49  
50 standardise criteria and develop an operational protocol for any new stage of  
51  
52  
53  
54  
55  
56  
57  
58  
59  
60

1  
2  
3  
4 disease (e.g., prodromal AD and pre-MCI) and undertake validation across settings  
5  
6 including oldest-old age groups and populations (vs. clinical samples).  
7  
8  
9

10  
11 The review should be viewed in light of some limitations. First, we choose to focus  
12  
13 on Petersen defined aMCI, as this is one of the commonly applied definitions in  
14  
15 clinical and research practice. However, not all trials on preclinical cognitive states  
16  
17 have used this definition of MCI with some studies defining intermediate cognitive  
18  
19 states using simply a MMSE score or using criteria that have made refinements to  
20  
21 the original aMCI criteria<sup>70, 71</sup>. The main change has been in the acceptable level of  
22  
23 functional impairment: from none to allowing minor problems, particularly in  
24  
25 complex activities such as for example, account keeping. Different definitions of MCI  
26  
27 have different prevalence estimates<sup>56</sup> and also vary in their risk of dementia  
28  
29 progression (e.g., more extensive patterns of cognitive changes have been  
30  
31 associated with greater progression of MCI to dementia)<sup>57</sup>. Subtypes have also been  
32  
33 defined depending on the neuropsychological profile including amnesic and non-  
34  
35 amnesic single or multi-domain MCI, and multi-domain combined MCI that includes  
36  
37 both memory and non-memory deficits. Which, if any, of the many different  
38  
39 criteria<sup>72</sup> and sub-types of preclinical decline should be adopted in RCTs or whether  
40  
41 no distinction should be made between MCI and AD during recruitment<sup>2</sup>, requires  
42  
43 further discussion.  
44  
45  
46  
47  
48  
49  
50

## 51 52 53 54 **Conclusion** 55 56 57 58 59 60

1  
2  
3  
4  
5  
6  
7  
8  
9  
10  
11  
12  
13  
14  
15  
16  
17  
18  
19  
20  
21  
22  
23  
24  
25  
26  
27  
28  
29  
30  
31  
32  
33  
34  
35  
36  
37  
38  
39  
40  
41  
42  
43  
44  
45  
46  
47  
48  
49  
50  
51  
52  
53  
54  
55  
56  
57  
58  
59  
60

Much work needs to be done on the characterisation of individuals at-risk of dementia for clinical trial recruitment. Within this framework attention is being focused on redefining the earliest stages of disease and generating new definitions of what constitutes “prodromal/pre-dementia” and “at-risk”. Standardisation in definition and development of an operational protocol will result in improvements in diagnosis and clinical trial methodology.

For peer review only

## References

- [1] Petersen RC. Mild cognitive impairment clinical trials. *Nat Rev Drug Discov*. 2003;**2**: 646-653.
- [2] Aisen PS, Andrieu S, Sampaio C, *et al*. Report of the task force on designing clinical trials in early (predementia) AD. *Neurology*. 2011;**76**: 280-286.
- [3] Petersen RC, Smith GE, Waring SC, *et al*. Mild Cognitive Impairment: Clinical Characterization and Outcome. *Arch Neurol*. 1999;**56**: 303-308.
- [4] Petersen RC, Doody R, Kurz A, *et al*. Current concepts in mild cognitive impairment. *Arch Neurol*. 2001;**58**: 1985-1992.
- [5] Moher D, Liberati A, Tetzlaff J, *et al*. Preferred Reporting Items for Systematic Reviews and Meta-Analyses: The PRISMA Statement. *PLoS Med*. 2009;**6**: e1000097.
- [6] Doody RS, Ferris SH, Salloway S, *et al*. Donepezil treatment of patients with MCI: A 48-week randomized, placebo-controlled trial. *Neurology*. 2009;**72**: 1555-1561.
- [7] Koontz J, Baskys A. Effects of galantamine on working memory and global functioning in patients with mild cognitive impairment: A double-blind placebo-controlled study. *American Journal of Alzheimer's Disease and other Dementias*. 2005;**20**: 295-302.
- [8] Mowla A, Mosavinasab M, Pani A. Does fluoxetine have any effect on the cognition of patients with mild cognitive impairment?: A double-blind, placebo-controlled, clinical trial. *Journal of Clinical Psychopharmacology*. 2007;**27**: 67-70.
- [9] Petersen RC, Thomas RG, Grundman M, *et al*. Vitamin E and donepezil for the treatment of mild cognitive impairment. *N Engl J Med*. 2005;**352**: 2379-2388.
- [10] Smith AD, Smith SM, de Jager CA, *et al*. Homocysteine-lowering by b vitamins slows the rate of accelerated brain atrophy in mild cognitive impairment: A randomized controlled trial. *PLoS ONE*. 2010;**5**: 1-10.
- [11] Thal LJ, Ferris SH, Kirby L, *et al*. A randomized, double-blind, study of rofecoxib in patients with mild cognitive impairment. *Neuropsychopharmacology*. 2005;**30**: 1204-1215.
- [12] Winblad B, Gauthier S, Scinto L, *et al*. Safety and efficacy of galantamine in subjects with mild cognitive impairment. *Neurology*. 2008;**70**: 2024-2035.
- [13] Chiu CC, Su KP, Cheng TC, *et al*. The effects of omega-3 fatty acids monotherapy in Alzheimer's disease and mild cognitive impairment: a preliminary randomized double-blind placebo-controlled study. *Prog Neuropsychopharmacol Biol Psychiatry*. 2008;**32**: 1538-1544.
- [14] Chen X, Magnotta VA, Duff K, *et al*. Donepezil effects on cerebral blood flow in older adults with mild cognitive deficits. *J Neuropsychiatry Clin Neurosci*. 2006;**18**: 178-185.
- [15] Kotani S, Sakaguchi E, Warashina S, *et al*. Dietary supplementation of arachidonic and docosahexaenoic acids improves cognitive dysfunction. *Neurosci Res*. 2006;**56**: 159-164.
- [16] Forlenza OV, Diniz BS, Radanovic M, *et al*. Disease-modifying properties of long-term lithium treatment for amnesic mild cognitive impairment: randomised controlled trial. *Br J Psychiatry*. 2011;**198**: 351-356.

- 1  
2  
3  
4 [17] Sherwin BB, Chertkow H, Schipper H, *et al.* A randomized controlled trial of  
5 estrogen treatment in men with mild cognitive impairment. *Neurobiol Aging*.  
6 2011;**32**: 1808-1817.
- 7 [18] Craft S, Baker LD, Montine TJ, *et al.* Intranasal insulin therapy for Alzheimer  
8 disease and amnesic mild cognitive impairment: a pilot clinical trial. *Arch Neurol*.  
9 2012;**69**: 29-38.
- 10 [19] Baker LD, Frank LL, Foster-Schubert K, *et al.* Effects of aerobic exercise on  
11 mild cognitive impairment: a controlled trial. *Arch Neurol*. 2010;**67**: 71-79.
- 12 [20] Scherder EJ, Van Paasschen J, Deijen JB, *et al.* Physical activity and executive  
13 functions in the elderly with mild cognitive impairment. *Aging Ment Health*. 2005;**9**:  
14 272-280.
- 15 [21] Jean L, Simard M, Wiederkehr S, *et al.* Efficacy of a cognitive training  
16 programme for mild cognitive impairment: Results of a randomised controlled study.  
17 *Neuropsychological Rehabilitation*. 2010;**20**: 377-405.
- 18 [22] Rapp S, Brenes G, Marsh AP. Memory enhancement training for older adults  
19 with mild cognitive impairment: A preliminary study. *Aging and Mental Health*.  
20 2002;**6**: 5-11.
- 21 [23] Troyer AK, Murphy KJ, Anderson ND, *et al.* Changing everyday memory  
22 behaviour in amnesic mild cognitive impairment: A randomised controlled trial.  
23 *Neuropsychological Rehabilitation*. 2008;**18**: 65-88.
- 24 [24] Kinsella GJ, Mullaly E, Rand E, *et al.* Early intervention for mild cognitive  
25 impairment: a randomised controlled trial. *Journal of Neurology, Neurosurgery &*  
26 *Psychiatry*. 2009;**80**: 730-736.
- 27 [25] Buschert VC, Friese U, Teipel SJ, *et al.* Effects of a newly developed cognitive  
28 intervention in amnesic mild cognitive impairment and mild Alzheimer's disease: a  
29 pilot study. *J Alzheimers Dis*. 2011;**25**: 679-694.
- 30 [26] Rozzini L, Costardi D, Chilovi V, *et al.* Efficacy of cognitive rehabilitation in  
31 patients with mild cognitive impairment treated with cholinesterase inhibitors.  
32 *International Journal of Geriatric Psychiatry*. 2007;**22**: 356-360.
- 33 [27] Van Uffelen JGZ, Hopman-Rock M, Chin A Paw MJM, *et al.* Protocol for  
34 Project FACT: A randomised controlled trial on the effect of a walking program and  
35 vitamin B supplementation on the rate of cognitive decline and psychosocial  
36 wellbeing in older adults with mild cognitive impairment [ISRCTN19227688]. *BMC*  
37 *Geriatrics*. 2005;**5**: doi:10.1186/1471-2318-1185-1118.
- 38 [28] Roth M, Tym E, Mountjoy CQ, *et al.* CAMDEX: The cambridge examination for  
39 mental disorders of the elderly. Cambridge: Cambridge University Press, 1988.
- 40 [29] Gilewski MJ, Zelinski EM. Memory Functioning Questionnaire (MFQ).  
41 *Psychopharmacology bulletin*. 1988;**24**: 665-670.
- 42 [30] Strawbridge WJ, Shema SJ, Balfour JL, *et al.* Antecedents of frailty over three  
43 decades in an older cohort. *The journals of gerontology Series B, Psychological*  
44 *sciences and social sciences*. 1998;**53**: S9-16.
- 45 [31] Folstein MF, Folstein SE, McHugh PR. "Mini-mental state". A practical method  
46 for grading the cognitive state of patients for the clinician. *J Psychiatr Res*. 1975;**12**:  
47 189-198.
- 48  
49  
50  
51  
52  
53  
54  
55  
56  
57  
58  
59  
60

- 1  
2  
3  
4  
5 [32] Jurica PJ, Leitten CL, Mattis S. *Dementia Rating Scale-2: Professional manual*.  
6 Lutz: Psychological Assessment Resources, 2001.
- 7 [33] Mattis S. *Dementia Rating Scale: Professional manual*. Odessa, FL:  
8 Psychological Assessment Resources, 1988.
- 9 [34] Brandt J, Spencer M, Folstein M. The telephone interview for cognitive status.  
10 *Neuropsychiatry, Neuropsychology and Behavioral Neurology* 1988;**1**: 111-117.
- 11 [35] Hughes CP, Berg L, Danziger WL, *et al*. A new clinical scale for the staging of  
12 dementia. *Br J Psychiatry*. 1982;**140**: 566-572.
- 13 [36] Rosen WG, Mohs RC, Davis KL. A new rating scale for Alzheimer's disease. *The*  
14 *American journal of psychiatry*. 1984;**141**: 1356-1364.
- 15 [37] Schneider LS, Olin JT, Doody RS, *et al*. Validity and reliability of the  
16 Alzheimer's Disease Cooperative Study-Clinical Global Impression of Change. The  
17 Alzheimer's Disease Cooperative Study. *Alzheimer disease and associated disorders*.  
18 1997;**11 Suppl 2**: S22-32.
- 19 [38] Randolph C, Tierney MC, Mohr E, *et al*. The Repeatable Battery for the  
20 Assessment of Neuropsychological Status (RBANS): preliminary clinical validity. *J Clin*  
21 *Exp Neuropsychol*. 1998;**20**: 310-319.
- 22 [39] Hebert R, Carrier R, Bilodeau A. The Functional Autonomy Measurement  
23 System (SMAF): description and validation of an instrument for the measurement of  
24 handicaps. *Age Ageing*. 1988;**17**: 293-302.
- 25 [40] Morris JC, Mohs RC, Rogers H, *et al*. Consortium to establish a registry for  
26 Alzheimer's disease (CERAD) clinical and neuropsychological assessment of  
27 Alzheimer's disease. *Psychopharmacology bulletin*. 1988;**24**: 641-652.
- 28 [41] Kempen GI, Miedema I, Ormel J, *et al*. The assessment of disability with the  
29 Groningen Activity Restriction Scale. Conceptual framework and psychometric  
30 properties. *Soc Sci Med*. 1996;**43**: 1601-1610.
- 31 [42] Lawton MP, Brody EM. Assessment of older people: self-maintaining and  
32 instrumental activities of daily living. *Gerontologist*. 1969;**9**: 179-186.
- 33 [43] Katz S, Downs TD, Cash HR, *et al*. Progress in development of the index of  
34 ADL. *Gerontologist*. 1970;**10**: 20-30.
- 35 [44] Wedderburn C, Wear H, Brown J, *et al*. The utility of the Cambridge  
36 Behavioural Inventory in neurodegenerative disease. *J Neurol Neurosurg Psychiatry*.  
37 2008;**79**: 500-503.
- 38 [45] American Psychiatric Association. *Diagnostic and Statistical Manual of Mental*  
39 *Disorders (Third Edition, revised) (DSM-III-R)*. Washington, DC: APA, 1987.
- 40 [46] American Psychiatric Association. *Diagnostic and Statistical Manual of Mental*  
41 *Disorders (Fourth Edition) (Text Revision: DMS-IV-TR)* Arlington, VA: American  
42 Psychiatric Publishing Inc, 2000.
- 43 [47] McKhann G, Drachman D, Folstein M, *et al*. Clinical diagnosis of Alzheimer's  
44 disease: report of the NINCDS-ADRDA Work Group under the auspices of  
45 Department of Health and Human Services Task Force on Alzheimer's Disease.  
46 *Neurology*. 1984;**34**: 939-944.
- 47 [48] Roman GC, Tatemichi TK, Erkinjuntti T, *et al*. Vascular dementia: diagnostic  
48 criteria for research studies. Report of the NINDS-AIREN International Workshop.  
49 *Neurology*. 1993;**43**: 250-260.
- 50  
51  
52  
53  
54  
55  
56  
57  
58  
59  
60

- 1  
2  
3  
4 [49] Reisberg B, Ferris SH, de Leon MJ, *et al.* The Global Deterioration Scale for  
5 assessment of primary degenerative dementia. *The American journal of psychiatry.*  
6 1982;**139**: 1136-1139.
- 7 [50] de Jager CA, Oulhaj A, Jacoby R, *et al.* Cognitive and clinical outcomes of  
8 homocysteine-lowering B-vitamin treatment in mild cognitive impairment: a  
9 randomized controlled trial. *International Journal of Geriatric Psychiatry.* 2012;**26**:  
10 592-600.
- 11 [51] Jorm AF. The Informant Questionnaire on cognitive decline in the elderly  
12 (IQCODE): a review. *Int Psychogeriatr.* 2004;**16**: 275-293.
- 13 [52] EuroQol Group. EuroQol-A new facility for the measurement of health-  
14 related quality of life. *Health Policy.* 1990;**16**: 199-208.
- 15 [53] Ebly EM, Hogan DB, Parhad IM. Cognitive impairment in the nondemented  
16 elderly. Results from the Canadian Study of Health and Aging. *Arch Neurol.* 1995;**52**:  
17 612-619.
- 18 [54] Duara R, Loewenstein DA, Greig MT, *et al.* Pre-MCI and MCI:  
19 neuropsychological, clinical, and imaging features and progression rates. *The*  
20 *American journal of geriatric psychiatry : official journal of the American Association*  
21 *for Geriatric Psychiatry.* 2011;**19**: 951-960.
- 22 [55] Stephan BC, Matthews FE, Khaw KT, *et al.* Beyond mild cognitive impairment:  
23 vascular cognitive impairment, no dementia (VCIND). *Alzheimer's research &*  
24 *therapy.* 2009;**1**: 4.
- 25 [56] Stephan BC, Matthews FE, McKeith IG, *et al.* Early cognitive change in the  
26 general population: how do different definitions work? *J Am Geriatr Soc.* 2007;**55**:  
27 1534-1540.
- 28 [57] Matthews FE, Stephan BC, McKeith IG, *et al.* Two-year progression from mild  
29 cognitive impairment to dementia: to what extent do different definitions agree? *J*  
30 *Am Geriatr Soc.* 2008;**56**: 1424-1433.
- 31 [58] Erkinjuntti T, Ostbye T, Steenhuis R, *et al.* The effect of different diagnostic  
32 criteria on the prevalence of dementia. *N Engl J Med.* 1997;**337**: 1667-1674.
- 33 [59] Wancata J, Borjesson-Hanson A, Ostling S, *et al.* Diagnostic criteria influence  
34 dementia prevalence. *The American journal of geriatric psychiatry : official journal of*  
35 *the American Association for Geriatric Psychiatry.* 2007;**15**: 1034-1045.
- 36 [60] Lonie JA, Tierney KM, Ebmeier KP. Screening for mild cognitive impairment: a  
37 systematic review. *Int J Geriatr Psychiatry.* 2009;**24**: 902-915.
- 38 [61] Mitchell AJ, Shiri-Feshki M. Rate of progression of mild cognitive impairment  
39 to dementia--meta-analysis of 41 robust inception cohort studies. *Acta psychiatrica*  
40 *Scandinavica.* 2009;**119**: 252-265.
- 41 [62] DeCarli C. Mild cognitive impairment: prevalence, prognosis, aetiology, and  
42 treatment. *The Lancet Neurology.* 2003;**2**: 15-21.
- 43 [63] Panza F, Capurso C, D'Introno A, *et al.* Heterogeneity of mild cognitive  
44 impairment and other predementia syndromes in progression to dementia.  
45 *Neurobiology of Aging.* 2007;**28**: 1631-1632.
- 46 [64] Petersen RC, Aisen PS, Beckett LA, *et al.* Alzheimer's Disease Neuroimaging  
47 Initiative (ADNI): clinical characterization. *Neurology.* 2010;**74**: 201-209.
- 48  
49  
50  
51  
52  
53  
54  
55  
56  
57  
58  
59  
60

- 1  
2  
3  
4 [65] Dubois B, Feldman HH, Jacova C, *et al.* Revising the definition of Alzheimer's  
5 disease: a new lexicon. *The Lancet Neurology*. 2010;**9**: 1118-1127.  
6 [66] Whitehair DC, Sherzai A, Emond J, *et al.* Influence of apolipoprotein e  
7 (epsilon)4 on rates of cognitive and functional decline in mild cognitive impairment.  
8 *Alzheimer's and Dementia*. 2010;**6**: 412-419.  
9 [67] Jack CR, Jr., Knopman DS, Jagust WJ, *et al.* Hypothetical model of dynamic  
10 biomarkers of the Alzheimer's pathological cascade. *Lancet Neurol*. 2010;**9**: 119-128.  
11 [68] Gauthier S, Reisberg B, Zaudig M, *et al.* Mild cognitive impairment. *Lancet*.  
12 2006;**367**: 1262-1270.  
13 [69] Sperling RA, Aisen PS, Beckett LA, *et al.* Toward defining the preclinical stages  
14 of Alzheimer's disease: recommendations from the National Institute on Aging-  
15 Alzheimer's Association workgroups on diagnostic guidelines for Alzheimer's disease.  
16 *Alzheimers Dement*. 2011;**7**: 280-292.  
17 [70] Winblad B, Palmer K, Kivipelto M, *et al.* Mild cognitive impairment--beyond  
18 controversies, towards a consensus: report of the International Working Group on  
19 Mild Cognitive Impairment. *J Intern Med*. 2004;**256**: 240-246.  
20 [71] Albert MS, DeKosky ST, Dickson D, *et al.* The diagnosis of mild cognitive  
21 impairment due to Alzheimer's disease: recommendations from the National  
22 Institute on Aging-Alzheimer's Association workgroups on diagnostic guidelines for  
23 Alzheimer's disease. *Alzheimers Dement*. 2011;**7**: 270-279.  
24 [72] Matthews FE, Stephan BC, Bond J, *et al.* Operationalization of mild cognitive  
25 impairment: a graphical approach. *PLoS Med*. 2007;**4**: 1615-1619.  
26  
27  
28  
29  
30  
31  
32  
33  
34  
35  
36  
37  
38  
39  
40  
41  
42  
43  
44  
45  
46  
47  
48  
49  
50  
51  
52  
53  
54  
55  
56  
57  
58  
59  
60



**Additional Files Attached**

**Figure 1** Petersen criteria for amnesic MCI (aMCI)

**Figure 2** PRISMA (2009) flow diagram of article selection

**Supplementary Table 1a** Characteristics of included studies

**Supplementary Table 1b** Methods used to map aMCI in included studies

**Supplementary Table 2** Tasks used to assess the MCI criteria of “objective cognitive decline” (alphabetic order)

**Acknowledgements****Author Contributions**

ICMJE authorship met by all authors. BS and TM designed the review. BS, TM, EP and MS contributed to review article selection, data extraction and writing the results section. BS, TM and MS wrote the first draft of the paper. CB and IM made substantial contribution to the intellectual content. All authors contributed to the final version and approve its submission.

**Funding Statement**

This research received no specific grant from any funding agency in the public, commercial or not-for-profit sectors. The authors were personally salaried by their institutions during the period of writing (though no specific salary was set aside or given for the writing of this paper).

**Competing Interests**

No author has a conflict of interest to declare.

## Diagnosing Mild Cognitive Impairment (MCI) in Clinical Trials: A Systematic Review

Blossom Christa Maree Stephan<sup>1\*</sup>, Thais Minett<sup>2</sup>, Emma Pagett<sup>2</sup>, Mario Siervo<sup>3</sup>, Carol Brayne<sup>2</sup> & Ian G McKeith<sup>3</sup>

1. Institute of Health and Society, Newcastle University, UK
2. Department of Public Health and Primary Care, Cambridge University, UK
3. Institute of Ageing, Newcastle University, UK

**\*Corresponding Author:**

**Blossom Christa Maree Stephan**

Institute of Health and Society  
Newcastle University  
The Baddiley-Clark Building  
Richardson Road  
Newcastle upon Tyne  
NE2 4AX  
United Kingdom  
Ph + 44 (0)191 222 3811

### Article Type Systematic Review

**Word Count** 3,075 (Excluding the Abstract and References)

**Summary** 98

**References** 72

**Figures** 2

**Supplementary Material** 2 Tables

**Keywords** Mild Cognitive Impairment (MCI), Randomised Controlled Trials, Operationalisation, Systematic Review

**ABSTRACT**

**Objective** To describe how criteria for amnesic Mild Cognitive Impairment (aMCI) have been operationalised in randomised controlled clinical trials (RCTs).

**Design** Systematic review.

**Information Sources** EMBASE, PubMed and PSYCHInfo were searched from their inception to February 2012. Electronic clinical trial registries were also searched (February 2012).

**Study Selection** RCTs were included where participant selection was made using Petersen et al (1999) defined aMCI. There was no restriction on intervention type or the outcome tested.

**Data Extraction** For each trial we extracted information on study design, demographics, exclusion criteria and the operationalisation strategy for the five aMCI diagnostic criterion including: (1) memory complain, (2) normal general cognitive function, (3) memory impairment, (4) no functional impairment and (5) no dementia.

**Results** 223 articles and 278 registered trials were reviewed of which 22 met inclusion criteria. Various methods were applied for operationalising aMCI criteria resulting in variability in participant selection. Memory complaint and assessment of general cognitive function were the most consistently measured criteria. There was large heterogeneity in the neuropsychological methods used to determine memory impairment. It was not possible to assess the impact of these differences on case selection accuracy for dementia prediction. Further limitations include selective and unclear reporting of how each of the criteria was measured.

1  
2  
3  
4 **Conclusion** The results highlight the urgent need for a standardised approach to  
5 mapping aMCI. Lack of uniformity in clinical diagnosis however is not exclusively a  
6  
7 problem for MCI but also for other clinical states such as dementia including  
8  
9 Alzheimer's disease and vascular dementia. Defining a uniform approach to MCI  
10  
11 classification, or indeed for any classification concept within the field of dementia,  
12  
13 should be a priority if further trials are to be undertaken in the older aged population  
14  
15 based on these concepts.  
16  
17  
18  
19  
20  
21  
22  
23  
24  
25  
26  
27  
28  
29  
30  
31  
32  
33  
34  
35  
36  
37  
38  
39  
40  
41  
42  
43  
44  
45  
46  
47  
48  
49  
50  
51  
52  
53  
54  
55  
56  
57  
58  
59  
60

## ARTICLE SUMMARY

### Article focus

- Accurate identification of individuals with preclinical dementia is important for clinical trial enrolment.
- Diagnosis of preclinical cases is usually made using the amnesic form of Mild Cognitive Impairment (aMCI). While specific criteria for implementation exist there is no operationalisation protocol.
- Research Question: How have criteria for aMCI been operationalised in randomised controlled clinical trials?

### Key messages

- Various methods have been applied for operationalising aMCI criteria in randomised controlled clinical trials resulting in variability in participant selection.
- The results highlight the urgent need for a standardised approach to mapping aMCI.
- Lack of specific methods for clinical diagnosis is not a problem unique to the field of MCI. Across studies there continues to be inconsistency in the instruments and methodology used to diagnose Alzheimer's disease and Vascular Dementia, including its prodromal stage, Vascular Cognitive Impairment no Dementia (VCIND). Revision of diagnostic criteria including standardisation of methods and instruments for operationalisation of each dementia subtype and for the different disease stages (e.g., prodromal, preclinical and clinical) should be a research priority.

**Strengths and limitations**

- The review focuses on preclinical dementia defined using aMCI. However, not all clinical trials on preclinical cognitive states have used this definition of MCI.
- We chose to focus on aMCI as this is one of the commonly applied definitions in clinical and research practice.

## INTRODUCTION

As new preventative strategies for dementia are developed, methods to select persons accurately for clinical trial involvement will be needed. In this perspective, Mild Cognitive Impairment (MCI), an intermediate state between normal ageing and dementia has become a focus for trials to prevent or delay progression to Alzheimer's Disease. The expectation is that positive results are more likely to be achieved with earlier treatment initiation<sup>1,2</sup>. While several different definitions exist for MCI, Petersen et al<sup>3,4</sup> defined amnesic Mild Cognitive Impairment (aMCI) is often used in clinical and research practice. However, despite being commonly applied, no standardised method for the operationalisation of each of the five component criteria (Figure 1) necessary for an aMCI diagnosis exists, resulting in heterogeneity in diagnostic methods and case ascertainment across studies. Indeed, there are numerous possibilities for the measurement of the five criteria as highlight in Figure 1. The lack of an established diagnostic methodology for identifying cases **for clinical trial enrolment** is problematic as study specific participant selection raises questions regarding the nature of the sample selected, whilst also making cross study comparison and generalizability of findings difficult.

We undertook a systematic review to explore the methods used to classify aMCI cases, defined using Petersen et al<sup>3</sup> criteria, in randomised controlled clinical trials (RCTs). The focus was on inclusion criteria and variation in the operationalisation of each of the five aMCI component criteria as outlined in Figure 1.



## METHODS

This review has been undertaken with adherence to the PRISMA statement<sup>5</sup>. The review protocol is available on request.

### Search Strategy

EMBASE (including Medline) and PSYCHInfo were searched using the following keywords and using Medical Subject Heading (MeSH) terms: ("mild cognitive impairment" OR MCI) AND ("randomised controlled trial" OR "randomized controlled trial" OR RCT). Articles were searched from inception to 6 June 2011, with the search updated on 21 February 2012. Web based searches, using the term 'mild cognitive impairment' were also undertaken in the ISRCTR trial registry (<http://www.controlled-trials.com>) and on [www.clinicaltrials.gov](http://www.clinicaltrials.gov) (17 February 2012).

Only studies that were published in English were included. Two investigators (BS and TM) independently searched publications using the following inclusion criteria: (1) the study was a RCT; (2) the trial had been completed (was not on-going or terminated) and results published; (3) the authors report selecting participants using the definition of aMCI as reported in Petersen et al (1999), and could include single or multi-domain amnesic MCI subtypes (amendments to criteria were allowed as long as stated and Petersen et al (1999) was referenced); and, (4) the MCI group was analysed separately to the dementia or control groups. The protocol paper or the first publication reporting the primary outcome was selected in case of multiple publications using the same study sample. Titles and abstracts were searched first, followed by the full text of any identified articles. Reviews were also retained and

1  
2  
3  
4 the reference lists of these and each included paper were interrogated.

5  
6 Disagreements were resolved by consensus. Data quality was not assessed as all  
7  
8 included studies were RCTs.  
9  
10

### 11 12 13 **Data Extraction**

14  
15 Data on the lead author, date of publication, study design (country, site, sampling  
16  
17 framework, duration, intervention), demographics (age and gender distributions),  
18  
19 trial exclusion criteria, dementia progression rates, **outcomes tested** and the  
20  
21 methods used to operationalised each of the five component criterion for the  
22  
23 diagnosis of aMCI were abstracted by two investigators (EP and TM) and checked by  
24  
25 a third (MS).  
26  
27  
28  
29  
30  
31

### 32 33 **RESULTS**

34  
35 A total of 223 articles were identified from the literature search. From the electronic  
36  
37 search 11 trials were identified from the ISRCTR trial registry and 267 from  
38  
39 [www.clinicaltrials.gov](http://www.clinicaltrials.gov). Based on the title-abstract search 84 articles were identified  
40  
41 for full text review. In total, 22 articles met inclusion criteria and were retained for  
42  
43 this review. Figure 2 shows the selection process using the PRISMA (2009) Flow  
44  
45 Diagram. As shown in Figure 2, articles were mainly excluded as the sample did not  
46  
47 appear to be defined using the Petersen et al 1999 criteria or had inadequate details  
48  
49 to support the use of Petersen et al 1999 criteria (e.g., only stated an objective  
50  
51 cognitive deficit), or the article was a review. **Supplementary Table 1a summarises**  
52  
53 **the general characteristics, demographics and outcomes tested in each included**  
54  
55  
56  
57  
58  
59  
60

1  
2  
3  
4 article. Supplementary Table 1b summarises the operationalisation protocol used for  
5  
6 identifying aMCI cases in each trial.  
7  
8  
9

10  
11 Trial exclusion criteria varied, but mainly related to cerebrovascular and  
12  
13 cardiovascular disease or health and psychiatric related conditions that could be  
14  
15 associated with cognitive decline. There were also differences in the population  
16  
17 sampled (clinic vs. community), site (single vs. multi-centre), duration (e.g., 90 days  
18  
19 to 4 years), and sample demographics (e.g., age range: 50-90 years). Interventions  
20  
21 included pharmacological agents and supplementation<sup>6-17</sup> (including: donepezil,  
22  
23 galantamine, rofecoxib, fluoxetine, lithium treatment, estrogen treatment [E<sub>2</sub>],  
24  
25 vitamin supplementation (E and B), and supplementation with omega-3 poly  
26  
27 unsaturated fatty acids, arachidonic and docosahexaenoic acids), insulin therapy<sup>18</sup>,  
28  
29 physical activity<sup>19, 20</sup> (e.g., aerobic exercise), cognitive training/rehabilitation  
30  
31 programmes<sup>21-25</sup> (e.g., memory training, strategy learning) and combined therapies  
32  
33 including cholinesterase inhibitor (ChEI) use combined with a cognitive training  
34  
35 program<sup>26</sup>, and physical activity combined with vitamin B supplementation<sup>27</sup>.  
36  
37  
38  
39  
40  
41

42 Outcomes varied extensively across studies and included assessment of cognitive  
43  
44 function (in all studies either as a primary or secondary outcome, with no  
45  
46 neuropsychological assessment applied consistently) in addition to non-cognitive  
47  
48 measures (e.g., vascular health such as blood pressure, quality of life, depression,  
49  
50 cerebrospinal fluid (CSF) biomarkers of Alzheimer's Disease pathology and  
51  
52 neuroimaging). Only five studies reported dementia progression rates all of which  
53  
54  
55  
56  
57  
58  
59  
60

1  
2  
3  
4 varied: 16%/year<sup>9</sup>, 5-6%/year<sup>11</sup>, 24% over one year<sup>16</sup>, 11.9% over a 24-weeks trial<sup>17</sup>  
5  
6  
7 and 15% over four years<sup>12</sup>. Most results were negative.  
8  
9

### 10 11 **Operationalizing MCI Component Criterion**

12  
13  
14 Two studies<sup>16, 19</sup> did not report details of the operationalization protocol for defining  
15  
16 MCI.  
17

#### 18 19 **Criterion 1: Memory Complaint**

20  
21  
22 Five studies<sup>7, 8, 16, 18, 19</sup> reported no details on how memory complaint was obtained.  
23  
24 The memory complaint was obtained from the subject in four<sup>15, 21, 22, 27</sup> studies while  
25  
26 eleven studies<sup>6, 9-11, 13, 14, 17, 20, 23, 24, 26</sup> utilised subject report and informant  
27  
28 corroboration. One study<sup>25</sup> gave unclear details on who reported the complaint. In  
29  
30 one study<sup>12</sup> this criterion was operationalised using a history of gradual onset and  
31  
32 slow progressive decline in cognitive function, but how this was reported, for  
33  
34 example from the subject or informant was not stated. Three studies<sup>10, 22, 27</sup> used  
35  
36 specific scales rather than a single question to assess memory complaint. Smith et  
37  
38 al<sup>10</sup> used four items from the Cambridge Examination for Mental Disorders  
39  
40 (CAMDEX)<sup>28</sup>. Rapp et al<sup>22</sup> used the Memory Functioning Questionnaire (MFQ)<sup>29</sup>  
41  
42 which is a 64-item questionnaire assessing memory problems and use of mnemonics.  
43  
44 Van Uffelen et al<sup>27</sup> used a positive response to a single item “do you have memory  
45  
46 complaints?” or answering “sometimes” at least twice on the cognition scale of  
47  
48 Strawbridge<sup>30</sup>.  
49  
50  
51  
52  
53  
54  
55  
56  
57  
58  
59  
60

**Criterion 2: General Cognitive Function**

This criterion was the most consistently measured and was typically operationalised using the Mini Mental State Examination (MMSE)<sup>31</sup> score either alone<sup>6-8, 10, 11, 22</sup> or in combination with other measures including: a structured interview with the patient and informant<sup>24</sup>, the Dementia Rating Scale-II<sup>32</sup> (DRS-II)<sup>23</sup>, the Mattis Dementia Rating Scale (DRS)<sup>33</sup> (total score)<sup>14</sup>, the Telephone Interview for Cognitive Status<sup>34</sup> (TICS)<sup>27</sup>, the Clinic Dementia Rating<sup>35</sup> (CDR) score<sup>9, 26</sup> or the Alzheimer's Disease Assessment Scale-Cognitive Subscale<sup>36</sup> (ADAS-Cog) in addition with the Clinician Interview-Based Impression of Change<sup>37</sup> (CIBIC)<sup>17</sup>. One study used only the CDR score of 0.5<sup>12</sup>.

The cut-off chosen for the MMSE varied from 23 to 26. Most studies used a cut-off value of  $\geq 24$ <sup>6, 9-11, 22, 26, 27</sup>, but  $\geq 26$ <sup>7</sup>,  $\geq 23$ <sup>25</sup>, or a score adjusted for age/education<sup>8, 23</sup>, were also used. In one study<sup>6</sup>, the protocol was modified during recruitment and the cut-off was adjusted from 24-30 to 24-28. One study<sup>20</sup> used a 12-Item shortened MMSE with a cut-off score of  $\geq 7$ . Three studies<sup>14, 17, 24</sup> specified the use of the MMSE but did not report a cut-off score. Six studies did not specify operationalisation of this criterion<sup>13, 15, 16, 18, 19, 21</sup>.

**Criterion 3: Object Memory Decline**

Five studies did not specify operationalisation of this criterion<sup>7, 8, 16, 19, 26</sup>. Numerous different tests were used to assess cognition as shown in Supplementary Table 2. In addition to inconsistency in test selection there was no consistency in impairment

1  
2  
3  
4 severity (e.g., 1 standard deviation (SD), 1.5SDs or 2SDs below the mean). Further, it  
5  
6 was not always stated whether cut-off scores for impairment were adjusted for age,  
7  
8 education or pre-morbid ability. In one study<sup>11</sup>, severity was adjusted from 1.5SDs  
9  
10 below the mean (used in the first 6 months) to 1SD below the mean during the  
11  
12 course of screening. Based on the nature of the objective deficit, three studies<sup>14, 21, 24</sup>  
13  
14 reported inclusion of single amnesic or multi-domain amnesic MCI. One study<sup>10</sup>  
15  
16 reported the use of combined amnesic and non-amnesic (single and multi-domain)  
17  
18 cases.  
19  
20  
21  
22  
23  
24

25  
26 In terms of non-memory performance one study<sup>22</sup> reported that this was tested and  
27  
28 required to be unimpaired (defined using a cut-off >10<sup>th</sup> percentile). Another<sup>13</sup>  
29  
30 reported that performance was required to be relatively normal in non-memory  
31  
32 domains. In one study<sup>15</sup> division of cases was unclear; the objective deficit in this  
33  
34 study was defined as impairment on a total score comprising five domains  
35  
36 (immediate & delayed memory, visuospatial/construction, language & attention)  
37  
38 assessed using the Repeatable Battery for the Assessment of Neuropsychological  
39  
40 Status (RBANS)<sup>38</sup>.  
41  
42  
43  
44  
45  
46

#### 47 **Criterion 4: ADL/IADL**

48  
49 Seven studies did not specify operationalisation of this criterion<sup>6, 8, 13, 16, 19</sup>. In twelve  
50  
51 studies<sup>7, 9, 11, 12, 15, 17, 18, 21, 23-27</sup>, minimal or non-significant functional impairment was  
52  
53 allowed. One study required that in MCI cases that had a MMSE score between 23  
54  
55 and 25, cognitive impairments did not significantly interfere with daily activities or  
56  
57  
58  
59  
60

1  
2  
3  
4 social functioning, determined by a caregiver report<sup>25</sup>. This restriction was not  
5  
6 required in MCI cases with a MMSE score  $\geq 26$ .  
7  
8

9  
10  
11 Functional impairment tended to be assessed by self or informant report of difficulty  
12  
13 with ADLs or Basic ADLs. Specific scales were used for functional assessment in some  
14  
15 studies<sup>10, 11, 21, 26, 27</sup> including: the Functional Autonomy Measurement System<sup>39</sup>  
16  
17 (SMAFQ), the Blessed Dementia Rating Scale-CERAD<sup>40</sup> version, the Groningen Activity  
18  
19 Restriction Scale<sup>41</sup> (GARS) and selected items from the Lawton<sup>42</sup> and Katz<sup>43</sup> scales or  
20  
21 items from the Cambridge Behavioural Inventory<sup>44</sup> (CBI). In only two studies did it  
22  
23 appear that no evidence of any functional impairment was allowed; one<sup>10</sup> based on 5  
24  
25 items related to ADLs from the CBI and another<sup>20</sup> specified no decline in ADLs  
26  
27 without their measurement being specified.  
28  
29  
30  
31  
32  
33  
34

### 35 **Criterion 5: Dementia Diagnosis**

36  
37 Three studies did not specify operationalization of this criterion<sup>7, 14, 19</sup>. Fourteen<sup>6, 8-11,</sup>  
38  
39 <sup>13, 15, 17, 18, 20, 21, 24-26</sup> studies used the Diagnostic and Statistical Manual (DSM-III-R/IV-  
40  
41 TR/-IV)<sup>45, 46</sup>, National Institute of Neurological and Communicative Disorders and  
42  
43 Stroke and the Alzheimer's Disease and Related Disorders Association (NINCDS-  
44  
45 ADRDA)<sup>47</sup> criteria or National Institute of Neurological Disorders and Stroke and  
46  
47 Association Internationale pour la Recherche et l'Enseignement en Neurosciences  
48  
49 (NINCDS-AIREN)<sup>48</sup> criteria. Two studies used the CDR score<sup>12, 16</sup> and one each used a  
50  
51 self-report of a diagnosis<sup>22</sup>, clinical judgement<sup>23</sup> or the TICS combined with a MMSE  
52  
53 score  $< 24$ <sup>27</sup>.  
54  
55  
56  
57  
58  
59  
60

### ***Additional Measures***

In some studies, additional measures, generally related to the assessment of global functioning (such as the CDR sum of boxes score) or dementia severity (e.g., from none, mild, moderate and severe) were made in parallel to the mapping of the five aMCI criteria. For example, two studies<sup>19, 21</sup> administered the Dementia Rating Scale (DRS), seven<sup>6, 8-12, 26</sup> the CDR, one<sup>11</sup> the Blessed Dementia Rating Scale<sup>40</sup> (BDRS), one<sup>17</sup> the CIBIC, and one<sup>25</sup> the Global Deterioration Scale<sup>49</sup> (GDS). One study<sup>10, 50</sup> also had informants complete both the Informant Questionnaire on Cognitive Decline in the Elderly<sup>51</sup> (IQCODE-Short form) and EuroQol<sup>52</sup> (EQ-5D), a measure of health status.

### **DISCUSSION**

This review highlights the lack of consistency in MCI case ascertainment in currently completed RCTs. How MCI was diagnosed was not always reported or clear and varying operationalisation protocols make it impossible to determine similarity across the samples recruited in the different trials. No recruitment protocol for the selection of MCI cases for future clinical trials can be recommended until classification accuracy of current methods is tested.

The review highlights the **continuing challenge of classifying and operationalising the current** Petersen et al (1999) definition of aMCI. Without a standard operationalisation protocol for defining aMCI trial recruitment will continue to be variable. **Indeed, within the field of dementia there is a lack of consistency in**



1  
2  
3  
4 operationalisation protocols not only for aMCI, but its associated disorders (e.g.,  
5  
6 Cognitive Impairment no Dementia<sup>53</sup>), dementia and its sub-types (such as  
7  
8 Alzheimer's Disease and vascular dementia), pre-MCI<sup>54</sup> and other preclinical states  
9  
10 such as VCIND<sup>55</sup>. Different diagnostic criteria for MCI affect prevalence<sup>56</sup> and  
11  
12 progression<sup>57</sup>. Similarly for dementia different criteria have been found to affect  
13  
14 prevalence<sup>58,59</sup>. Inconsistency in case classification can have implications for research  
15  
16 and trial recruitment and outcomes.  
17  
18  
19

20  
21  
22  
23 With regard to MCI, consensus needs to be reached on five core issues relating to  
24  
25 the measurement of each of the component criteria. First, whether memory  
26  
27 complaint should be self and/or informant reported and how it should be assessed  
28  
29 (e.g., single or multiple items). Second, how global cognitive function should be  
30  
31 assessed with possible measures including the MMSE, CDR and Global Deterioration  
32  
33 Scale, and what the best cut-off score is (within and across cultures). Third, which  
34  
35 neuropsychological test(s) should be used to assess memory<sup>60</sup>, what should be the  
36  
37 severity of cognitive impairment (1SD, 1.5SD) and whether covariate adjustment is  
38  
39 needed. In addition, is the question of whether both memory and non-memory  
40  
41 domains should be tested. Possible tests identified in this review are outlined in  
42  
43 Supplementary Table 2. Fourth, how functional performance should be assessed (the  
44  
45 type of questions), the nature of the task (e.g., instrumental ADLs, basic ADLs),  
46  
47 reporting (e.g., patient, informant or clinician) and what is the maximum level of  
48  
49 impairment (e.g., none, mild, moderate or severe difficulty or significant difficulty in  
50  
51 some areas but not in others). Fifth, how dementia should be defined for exclusion  
52  
53  
54  
55  
56  
57  
58  
59  
60

1  
2  
3  
4 with examples used including: the DSM or NINCDS-ADRDA criteria, the CDR sum of  
5  
6 boxes score  $\geq 1$  or via screening instruments (e.g., the Telephone Screening  
7  
8 Instrument). It should be noted that aMCI is not always operationalised as originally  
9  
10 specified (e.g., permissible significant functional impairment in some studies) and  
11  
12 consensus needs to be reached on whether all five criterion are necessary. Further,  
13  
14 whether modifications (if any) to criteria can be made and the implications of making  
15  
16 modifications, for example, in terms of dementia predictability and effect on  
17  
18 generalizability, needs to be established.  
19  
20  
21  
22  
23

24  
25 Decision also needs to be reached on the best treatment target. The impairment  
26  
27 captured in aMCI is not always progressive, with a proportion of cases reverting to  
28  
29 normal or remaining stable at follow-up, particularly when mapped in population-  
30  
31 based studies<sup>57,61</sup>. Indeed, symptoms of MCI are not always a consequence of  
32  
33 Alzheimer's pathology, but rather can have multiple aetiologies such as depression  
34  
35 or vascular disease each with different outcomes (e.g., dementia progression,  
36  
37 improvement with treatment for the underlying health symptoms)<sup>62,63</sup>. Better  
38  
39 methods are needed to determine the underlying cause of disease in this patient  
40  
41 group to accurately identify those individuals whose MCI is associated with  
42  
43 Alzheimer's Disease. One possibility could be defining aMCI as in the Alzheimer's  
44  
45 Disease Cooperative Study trial<sup>9</sup> (based on a subjective memory complaint, MMSE  
46  
47 score, impaired performance on the Logical Memory II Subscale, no functional  
48  
49 impairment and a CDR score of 0.5) as implementation of this methodology has been  
50  
51 found to result in a consistent rate of dementia progression (approximately  
52  
53  
54  
55  
56  
57  
58  
59  
60

1  
2  
3  
4 16%/year) across studies, including the multicentre Alzheimer's Disease  
5  
6  
7 Neuroimaging Initiative<sup>64</sup>. Further research is needed to test this method of  
8  
9 operationalisation across cohorts (clinical and population based; across countries)  
10  
11 and calculate prevalence and longitudinal course in order to determine  
12  
13 generalisability of these findings.  
14  
15

16  
17  
18 A recent task force on designing trials in early (pre-dementia) AD argues for the use  
19  
20 of aMCI criteria in combination with biomarkers to improve case selection for clinical  
21  
22 trials<sup>2, 65</sup>. Suggestions for possible biomarkers have included hippocampal or whole  
23  
24 brain atrophy, CSF A $\beta$ 42 levels, PiB imaging, genetic screening (APOE e4 status) or  
25  
26 behavioural deficits<sup>66-68</sup>, as each has been associated with dementia. Further, how  
27  
28 dementia and AD are defined is currently undergoing revision, with the aim of  
29  
30 improved stratification of patients<sup>65, 69</sup>. Where MCI now sits in the ever changing  
31  
32 "lexicon" of AD (i.e., given there is currently no concrete border between preclinical  
33  
34 and clinical disease) will have implications for who is targeted for clinical trial  
35  
36 recruitment. For example, MCI as defined by Petersen criteria may no longer be  
37  
38 considered at-risk, but as already AD, and encompassed in the new term "prodromal  
39  
40 AD"; an early symptomatic stage pre-dementia where a patient shows evidence of  
41  
42 memory impairment and positive ratings on pathophysiological and topographical  
43  
44 markers of AD<sup>65</sup>. Clinical trial research may therefore shift some focus to  
45  
46 asymptomatic at-risk states (e.g., pre-MCI) where individuals are biomarker positive  
47  
48 for AD but are otherwise healthy. However, like aMCI efforts are needed to  
49  
50 standardise criteria and develop an operational protocol for any new stage of  
51  
52  
53  
54  
55  
56  
57  
58  
59  
60

1  
2  
3  
4 disease (e.g., prodromal AD and pre-MCI) and undertake validation across settings  
5  
6 including oldest-old age groups and populations (vs. clinical samples).  
7  
8  
9

10  
11 The review should be viewed in light of some limitations. First, we choose to focus  
12  
13 on Petersen defined aMCI, as this is one of the commonly applied definitions in  
14  
15 clinical and research practice. However, not all trials on preclinical cognitive states  
16  
17 have used this definition of MCI with some studies defining intermediate cognitive  
18  
19 states using simply a MMSE score or using criteria that have made refinements to  
20  
21 the original aMCI criteria<sup>70, 71</sup>. The main change has been in the acceptable level of  
22  
23 functional impairment: from none to allowing minor problems, particularly in  
24  
25 complex activities such as for example, account keeping. Different definitions of MCI  
26  
27 have different prevalence estimates<sup>56</sup> and also vary in their risk of dementia  
28  
29 progression (e.g., more extensive patterns of cognitive changes have been  
30  
31 associated with greater progression of MCI to dementia)<sup>57</sup>. Subtypes have also been  
32  
33 defined depending on the neuropsychological profile including amnesic and non-  
34  
35 amnesic single or multi-domain MCI, and multi-domain combined MCI that includes  
36  
37 both memory and non-memory deficits. Which, if any, of the many different  
38  
39 criteria<sup>72</sup> and sub-types of preclinical decline should be adopted in RCTs or whether  
40  
41 no distinction should be made between MCI and AD during recruitment<sup>2</sup>, requires  
42  
43 further discussion.  
44  
45  
46  
47  
48  
49  
50

## 51 52 53 54 **Conclusion** 55 56 57 58 59 60

1  
2  
3  
4  
5  
6  
7  
8  
9  
10  
11  
12  
13  
14  
15  
16  
17  
18  
19  
20  
21  
22  
23  
24  
25  
26  
27  
28  
29  
30  
31  
32  
33  
34  
35  
36  
37  
38  
39  
40  
41  
42  
43  
44  
45  
46  
47  
48  
49  
50  
51  
52  
53  
54  
55  
56  
57  
58  
59  
60

Much work needs to be done on the characterisation of individuals at-risk of dementia for clinical trial recruitment. Within this framework attention is being focused on redefining the earliest stages of disease and generating new definitions of what constitutes “prodromal/pre-dementia” and “at-risk”. Standardisation in definition and development of an operational protocol will result in improvements in diagnosis and clinical trial methodology.

For peer review only

## References

- [1] Petersen RC. Mild cognitive impairment clinical trials. *Nat Rev Drug Discov*. 2003;**2**: 646-653.
- [2] Aisen PS, Andrieu S, Sampaio C, *et al*. Report of the task force on designing clinical trials in early (predementia) AD. *Neurology*. 2011;**76**: 280-286.
- [3] Petersen RC, Smith GE, Waring SC, *et al*. Mild Cognitive Impairment: Clinical Characterization and Outcome. *Arch Neurol*. 1999;**56**: 303-308.
- [4] Petersen RC, Doody R, Kurz A, *et al*. Current concepts in mild cognitive impairment. *Arch Neurol*. 2001;**58**: 1985-1992.
- [5] Moher D, Liberati A, Tetzlaff J, *et al*. Preferred Reporting Items for Systematic Reviews and Meta-Analyses: The PRISMA Statement. *PLoS Med*. 2009;**6**: e1000097.
- [6] Doody RS, Ferris SH, Salloway S, *et al*. Donepezil treatment of patients with MCI: A 48-week randomized, placebo-controlled trial. *Neurology*. 2009;**72**: 1555-1561.
- [7] Koontz J, Baskys A. Effects of galantamine on working memory and global functioning in patients with mild cognitive impairment: A double-blind placebo-controlled study. *American Journal of Alzheimer's Disease and other Dementias*. 2005;**20**: 295-302.
- [8] Mowla A, Mosavinasab M, Pani A. Does fluoxetine have any effect on the cognition of patients with mild cognitive impairment?: A double-blind, placebo-controlled, clinical trial. *Journal of Clinical Psychopharmacology*. 2007;**27**: 67-70.
- [9] Petersen RC, Thomas RG, Grundman M, *et al*. Vitamin E and donepezil for the treatment of mild cognitive impairment. *N Engl J Med*. 2005;**352**: 2379-2388.
- [10] Smith AD, Smith SM, de Jager CA, *et al*. Homocysteine-lowering by b vitamins slows the rate of accelerated brain atrophy in mild cognitive impairment: A randomized controlled trial. *PLoS ONE*. 2010;**5**: 1-10.
- [11] Thal LJ, Ferris SH, Kirby L, *et al*. A randomized, double-blind, study of rofecoxib in patients with mild cognitive impairment. *Neuropsychopharmacology*. 2005;**30**: 1204-1215.
- [12] Winblad B, Gauthier S, Scinto L, *et al*. Safety and efficacy of galantamine in subjects with mild cognitive impairment. *Neurology*. 2008;**70**: 2024-2035.
- [13] Chiu CC, Su KP, Cheng TC, *et al*. The effects of omega-3 fatty acids monotherapy in Alzheimer's disease and mild cognitive impairment: a preliminary randomized double-blind placebo-controlled study. *Prog Neuropsychopharmacol Biol Psychiatry*. 2008;**32**: 1538-1544.
- [14] Chen X, Magnotta VA, Duff K, *et al*. Donepezil effects on cerebral blood flow in older adults with mild cognitive deficits. *J Neuropsychiatry Clin Neurosci*. 2006;**18**: 178-185.
- [15] Kotani S, Sakaguchi E, Warashina S, *et al*. Dietary supplementation of arachidonic and docosahexaenoic acids improves cognitive dysfunction. *Neurosci Res*. 2006;**56**: 159-164.
- [16] Forlenza OV, Diniz BS, Radanovic M, *et al*. Disease-modifying properties of long-term lithium treatment for amnesic mild cognitive impairment: randomised controlled trial. *Br J Psychiatry*. 2011;**198**: 351-356.

- 1  
2  
3  
4 [17] Sherwin BB, Chertkow H, Schipper H, *et al.* A randomized controlled trial of  
5 estrogen treatment in men with mild cognitive impairment. *Neurobiol Aging*.  
6 2011;**32**: 1808-1817.
- 7 [18] Craft S, Baker LD, Montine TJ, *et al.* Intranasal insulin therapy for Alzheimer  
8 disease and amnesic mild cognitive impairment: a pilot clinical trial. *Arch Neurol*.  
9 2012;**69**: 29-38.
- 10 [19] Baker LD, Frank LL, Foster-Schubert K, *et al.* Effects of aerobic exercise on  
11 mild cognitive impairment: a controlled trial. *Arch Neurol*. 2010;**67**: 71-79.
- 12 [20] Scherder EJ, Van Paasschen J, Deijen JB, *et al.* Physical activity and executive  
13 functions in the elderly with mild cognitive impairment. *Aging Ment Health*. 2005;**9**:  
14 272-280.
- 15 [21] Jean L, Simard M, Wiederkehr S, *et al.* Efficacy of a cognitive training  
16 programme for mild cognitive impairment: Results of a randomised controlled study.  
17 *Neuropsychological Rehabilitation*. 2010;**20**: 377-405.
- 18 [22] Rapp S, Brenes G, Marsh AP. Memory enhancement training for older adults  
19 with mild cognitive impairment: A preliminary study. *Aging and Mental Health*.  
20 2002;**6**: 5-11.
- 21 [23] Troyer AK, Murphy KJ, Anderson ND, *et al.* Changing everyday memory  
22 behaviour in amnesic mild cognitive impairment: A randomised controlled trial.  
23 *Neuropsychological Rehabilitation*. 2008;**18**: 65-88.
- 24 [24] Kinsella GJ, Mullaly E, Rand E, *et al.* Early intervention for mild cognitive  
25 impairment: a randomised controlled trial. *Journal of Neurology, Neurosurgery &*  
26 *Psychiatry*. 2009;**80**: 730-736.
- 27 [25] Buschert VC, Friese U, Teipel SJ, *et al.* Effects of a newly developed cognitive  
28 intervention in amnesic mild cognitive impairment and mild Alzheimer's disease: a  
29 pilot study. *J Alzheimers Dis*. 2011;**25**: 679-694.
- 30 [26] Rozzini L, Costardi D, Chilovi V, *et al.* Efficacy of cognitive rehabilitation in  
31 patients with mild cognitive impairment treated with cholinesterase inhibitors.  
32 *International Journal of Geriatric Psychiatry*. 2007;**22**: 356-360.
- 33 [27] Van Uffelen JGZ, Hopman-Rock M, Chin A Paw MJM, *et al.* Protocol for  
34 Project FACT: A randomised controlled trial on the effect of a walking program and  
35 vitamin B supplementation on the rate of cognitive decline and psychosocial  
36 wellbeing in older adults with mild cognitive impairment [ISRCTN19227688]. *BMC*  
37 *Geriatrics*. 2005;**5**: doi:10.1186/1471-2318-1185-1118.
- 38 [28] Roth M, Tym E, Mountjoy CQ, *et al.* CAMDEX: The cambridge examination for  
39 mental disorders of the elderly. Cambridge: Cambridge University Press, 1988.
- 40 [29] Gilewski MJ, Zelinski EM. Memory Functioning Questionnaire (MFQ).  
41 *Psychopharmacology bulletin*. 1988;**24**: 665-670.
- 42 [30] Strawbridge WJ, Shema SJ, Balfour JL, *et al.* Antecedents of frailty over three  
43 decades in an older cohort. *The journals of gerontology Series B, Psychological*  
44 *sciences and social sciences*. 1998;**53**: S9-16.
- 45 [31] Folstein MF, Folstein SE, McHugh PR. "Mini-mental state". A practical method  
46 for grading the cognitive state of patients for the clinician. *J Psychiatr Res*. 1975;**12**:  
47 189-198.
- 48  
49  
50  
51  
52  
53  
54  
55  
56  
57  
58  
59  
60

- 1  
2  
3  
4  
5 [32] Jurica PJ, Leitten CL, Mattis S. *Dementia Rating Scale-2: Professional manual*.  
6 Lutz: Psychological Assessment Resources, 2001.
- 7 [33] Mattis S. *Dementia Rating Scale: Professional manual*. Odessa, FL:  
8 Psychological Assessment Resources, 1988.
- 9 [34] Brandt J, Spencer M, Folstein M. The telephone interview for cognitive status.  
10 *Neuropsychiatry, Neuropsychology and Behavioral Neurology* 1988;**1**: 111-117.
- 11 [35] Hughes CP, Berg L, Danziger WL, *et al*. A new clinical scale for the staging of  
12 dementia. *Br J Psychiatry*. 1982;**140**: 566-572.
- 13 [36] Rosen WG, Mohs RC, Davis KL. A new rating scale for Alzheimer's disease. *The*  
14 *American journal of psychiatry*. 1984;**141**: 1356-1364.
- 15 [37] Schneider LS, Olin JT, Doody RS, *et al*. Validity and reliability of the  
16 Alzheimer's Disease Cooperative Study-Clinical Global Impression of Change. The  
17 Alzheimer's Disease Cooperative Study. *Alzheimer disease and associated disorders*.  
18 1997;**11 Suppl 2**: S22-32.
- 19 [38] Randolph C, Tierney MC, Mohr E, *et al*. The Repeatable Battery for the  
20 Assessment of Neuropsychological Status (RBANS): preliminary clinical validity. *J Clin*  
21 *Exp Neuropsychol*. 1998;**20**: 310-319.
- 22 [39] Hebert R, Carrier R, Bilodeau A. The Functional Autonomy Measurement  
23 System (SMAF): description and validation of an instrument for the measurement of  
24 handicaps. *Age Ageing*. 1988;**17**: 293-302.
- 25 [40] Morris JC, Mohs RC, Rogers H, *et al*. Consortium to establish a registry for  
26 Alzheimer's disease (CERAD) clinical and neuropsychological assessment of  
27 Alzheimer's disease. *Psychopharmacology bulletin*. 1988;**24**: 641-652.
- 28 [41] Kempen GI, Miedema I, Ormel J, *et al*. The assessment of disability with the  
29 Groningen Activity Restriction Scale. Conceptual framework and psychometric  
30 properties. *Soc Sci Med*. 1996;**43**: 1601-1610.
- 31 [42] Lawton MP, Brody EM. Assessment of older people: self-maintaining and  
32 instrumental activities of daily living. *Gerontologist*. 1969;**9**: 179-186.
- 33 [43] Katz S, Downs TD, Cash HR, *et al*. Progress in development of the index of  
34 ADL. *Gerontologist*. 1970;**10**: 20-30.
- 35 [44] Wedderburn C, Wear H, Brown J, *et al*. The utility of the Cambridge  
36 Behavioural Inventory in neurodegenerative disease. *J Neurol Neurosurg Psychiatry*.  
37 2008;**79**: 500-503.
- 38 [45] American Psychiatric Association. *Diagnostic and Statistical Manual of Mental*  
39 *Disorders (Third Edition, revised) (DSM-III-R)*. Washington, DC: APA, 1987.
- 40 [46] American Psychiatric Association. *Diagnostic and Statistical Manual of Mental*  
41 *Disorders (Fourth Edition) (Text Revision: DMS-IV-TR)* Arlington, VA: American  
42 Psychiatric Publishing Inc, 2000.
- 43 [47] McKhann G, Drachman D, Folstein M, *et al*. Clinical diagnosis of Alzheimer's  
44 disease: report of the NINCDS-ADRDA Work Group under the auspices of  
45 Department of Health and Human Services Task Force on Alzheimer's Disease.  
46 *Neurology*. 1984;**34**: 939-944.
- 47 [48] Roman GC, Tatemichi TK, Erkinjuntti T, *et al*. Vascular dementia: diagnostic  
48 criteria for research studies. Report of the NINDS-AIREN International Workshop.  
49 *Neurology*. 1993;**43**: 250-260.
- 50  
51  
52  
53  
54  
55  
56  
57  
58  
59  
60



- 1  
2  
3  
4 [49] Reisberg B, Ferris SH, de Leon MJ, *et al.* The Global Deterioration Scale for  
5 assessment of primary degenerative dementia. *The American journal of psychiatry.*  
6 1982;**139**: 1136-1139.
- 7 [50] de Jager CA, Oulhaj A, Jacoby R, *et al.* Cognitive and clinical outcomes of  
8 homocysteine-lowering B-vitamin treatment in mild cognitive impairment: a  
9 randomized controlled trial. *International Journal of Geriatric Psychiatry.* 2012;**26**:  
10 592-600.
- 11 [51] Jorm AF. The Informant Questionnaire on cognitive decline in the elderly  
12 (IQCODE): a review. *Int Psychogeriatr.* 2004;**16**: 275-293.
- 13 [52] EuroQol Group. EuroQol-A new facility for the measurement of health-  
14 related quality of life. *Health Policy.* 1990;**16**: 199-208.
- 15 [53] Ebly EM, Hogan DB, Parhad IM. Cognitive impairment in the nondemented  
16 elderly. Results from the Canadian Study of Health and Aging. *Arch Neurol.* 1995;**52**:  
17 612-619.
- 18 [54] Duara R, Loewenstein DA, Greig MT, *et al.* Pre-MCI and MCI:  
19 neuropsychological, clinical, and imaging features and progression rates. *The*  
20 *American journal of geriatric psychiatry : official journal of the American Association*  
21 *for Geriatric Psychiatry.* 2011;**19**: 951-960.
- 22 [55] Stephan BC, Matthews FE, Khaw KT, *et al.* Beyond mild cognitive impairment:  
23 vascular cognitive impairment, no dementia (VCIND). *Alzheimer's research &*  
24 *therapy.* 2009;**1**: 4.
- 25 [56] Stephan BC, Matthews FE, McKeith IG, *et al.* Early cognitive change in the  
26 general population: how do different definitions work? *J Am Geriatr Soc.* 2007;**55**:  
27 1534-1540.
- 28 [57] Matthews FE, Stephan BC, McKeith IG, *et al.* Two-year progression from mild  
29 cognitive impairment to dementia: to what extent do different definitions agree? *J*  
30 *Am Geriatr Soc.* 2008;**56**: 1424-1433.
- 31 [58] Erkinjuntti T, Ostbye T, Steenhuis R, *et al.* The effect of different diagnostic  
32 criteria on the prevalence of dementia. *N Engl J Med.* 1997;**337**: 1667-1674.
- 33 [59] Wancata J, Borjesson-Hanson A, Ostling S, *et al.* Diagnostic criteria influence  
34 dementia prevalence. *The American journal of geriatric psychiatry : official journal of*  
35 *the American Association for Geriatric Psychiatry.* 2007;**15**: 1034-1045.
- 36 [60] Lonie JA, Tierney KM, Ebmeier KP. Screening for mild cognitive impairment: a  
37 systematic review. *Int J Geriatr Psychiatry.* 2009;**24**: 902-915.
- 38 [61] Mitchell AJ, Shiri-Feshki M. Rate of progression of mild cognitive impairment  
39 to dementia--meta-analysis of 41 robust inception cohort studies. *Acta psychiatrica*  
40 *Scandinavica.* 2009;**119**: 252-265.
- 41 [62] DeCarli C. Mild cognitive impairment: prevalence, prognosis, aetiology, and  
42 treatment. *The Lancet Neurology.* 2003;**2**: 15-21.
- 43 [63] Panza F, Capurso C, D'Introno A, *et al.* Heterogeneity of mild cognitive  
44 impairment and other predementia syndromes in progression to dementia.  
45 *Neurobiology of Aging.* 2007;**28**: 1631-1632.
- 46 [64] Petersen RC, Aisen PS, Beckett LA, *et al.* Alzheimer's Disease Neuroimaging  
47 Initiative (ADNI): clinical characterization. *Neurology.* 2010;**74**: 201-209.
- 48  
49  
50  
51  
52  
53  
54  
55  
56  
57  
58  
59  
60

- 1  
2  
3  
4 [65] Dubois B, Feldman HH, Jacova C, *et al.* Revising the definition of Alzheimer's  
5 disease: a new lexicon. *The Lancet Neurology*. 2010;**9**: 1118-1127.  
6 [66] Whitehair DC, Sherzai A, Emond J, *et al.* Influence of apolipoprotein e  
7 (epsilon)4 on rates of cognitive and functional decline in mild cognitive impairment.  
8 *Alzheimer's and Dementia*. 2010;**6**: 412-419.  
9 [67] Jack CR, Jr., Knopman DS, Jagust WJ, *et al.* Hypothetical model of dynamic  
10 biomarkers of the Alzheimer's pathological cascade. *Lancet Neurol*. 2010;**9**: 119-128.  
11 [68] Gauthier S, Reisberg B, Zaudig M, *et al.* Mild cognitive impairment. *Lancet*.  
12 2006;**367**: 1262-1270.  
13 [69] Sperling RA, Aisen PS, Beckett LA, *et al.* Toward defining the preclinical stages  
14 of Alzheimer's disease: recommendations from the National Institute on Aging-  
15 Alzheimer's Association workgroups on diagnostic guidelines for Alzheimer's disease.  
16 *Alzheimers Dement*. 2011;**7**: 280-292.  
17 [70] Winblad B, Palmer K, Kivipelto M, *et al.* Mild cognitive impairment--beyond  
18 controversies, towards a consensus: report of the International Working Group on  
19 Mild Cognitive Impairment. *J Intern Med*. 2004;**256**: 240-246.  
20 [71] Albert MS, DeKosky ST, Dickson D, *et al.* The diagnosis of mild cognitive  
21 impairment due to Alzheimer's disease: recommendations from the National  
22 Institute on Aging-Alzheimer's Association workgroups on diagnostic guidelines for  
23 Alzheimer's disease. *Alzheimers Dement*. 2011;**7**: 270-279.  
24 [72] Matthews FE, Stephan BC, Bond J, *et al.* Operationalization of mild cognitive  
25 impairment: a graphical approach. *PLoS Med*. 2007;**4**: 1615-1619.  
26  
27  
28  
29  
30  
31  
32  
33  
34  
35  
36  
37  
38  
39  
40  
41  
42  
43  
44  
45  
46  
47  
48  
49  
50  
51  
52  
53  
54  
55  
56  
57  
58  
59  
60

**Additional Files Attached**

**Figure 1** Petersen criteria for amnesic MCI (aMCI)

**Figure 2** PRISMA (2009) flow diagram of article selection

**Supplementary Table 1a** Characteristics of included studies

**Supplementary Table 1b** Methods used to map aMCI in included studies

**Supplementary Table 2** Tasks used to assess the MCI criteria of “objective cognitive decline” (alphabetic order)

**Acknowledgements****Author Contributions**

ICMJE authorship met by all authors. BS and TM designed the review. BS, TM, EP and MS contributed to review article selection, data extraction and writing the results section. BS, TM and MS wrote the first draft of the paper. CB and IM made substantial contribution to the intellectual content. All authors contributed to the final version and approve its submission.

**Funding Statement**

This research received no specific grant from any funding agency in the public, commercial or not-for-profit sectors. The authors were personally salaried by their institutions during the period of writing (though no specific salary was set aside or given for the writing of this paper).

**Competing Interests**

No author has a conflict of interest to declare.

**Figure 1** Petersen criteria for amnesic MCI (aMCI)

|    |                                                                                                                                                                                             |
|----|---------------------------------------------------------------------------------------------------------------------------------------------------------------------------------------------|
| 1. | Subjective memory complaint (preferably corroborated by an informant)<br><b>Operationalisation Issues</b> Participant, informant, single question, questionnaire                            |
| 2. | Normal general cognitive function<br><b>Operationalisation Issues</b> Test selection, use of a cut-off score, adjustments for age, education or prior ability                               |
| 3. | Objective memory impairment<br><b>Operationalisation Issues</b> Test selection, use of a cut-off score, adjustments for age, education or prior ability                                     |
| 4. | Preserved activities of daily living (ADL)<br><b>Operationalisation Issues</b> Type of impairment such as instrumental or basic activities of living, degree of difficulty (if any) allowed |
| 5. | No dementia<br><b>Operationalisation Issues</b> Impact of diagnostic criteria on caseness                                                                                                   |

Petersen criteria for amnesic MCI (aMCI)  
102x66mm (300 x 300 DPI)

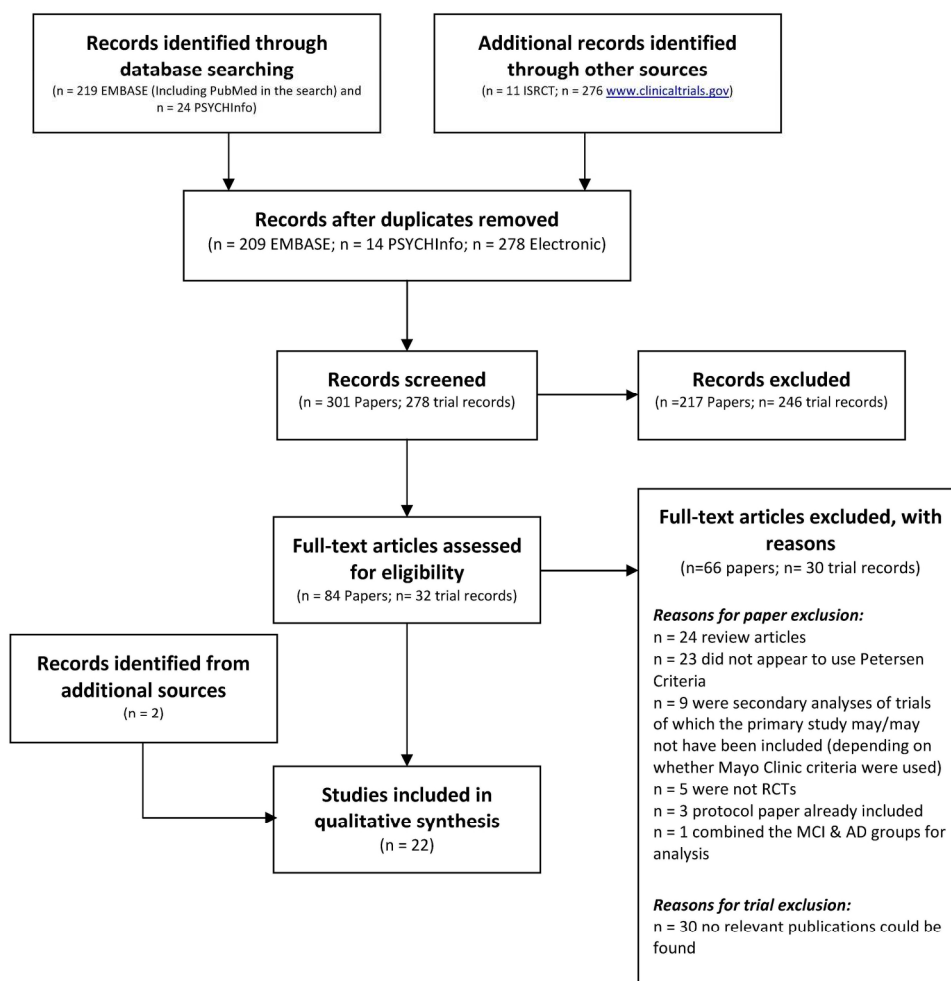

Figure 2. PRISMA (2009) flow diagram of article selection  
191x205mm (300 x 300 DPI)

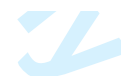

1  
2  
3  
4  
5  
6  
7  
8  
9  
10  
11  
12  
13  
14  
15  
16  
17  
18  
19  
20  
21  
22  
23  
24  
25  
26  
27  
28  
29  
30  
31  
32  
33  
34  
35  
36  
37  
38  
39  
40  
41  
42  
43  
44  
45  
46  
47  
48  
49  
50  
51  
52  
53  
54  
55  
56  
57  
58  
59  
60

**Table 1a** Characteristics of included studies

| Reference (First Author, Year) | Sample (Country)                                                     | Intervention                                                                                                                    | Number of Subjects Randomised                                                 | Age Range                                              | Gender (M:F)            | Mean Baseline MMSE (MCI cases)               | Single or Multi Domain Amnesic MCI | Outcomes Tested                                                                                                                                                                                                                                                                                                                                                                                                   |
|--------------------------------|----------------------------------------------------------------------|---------------------------------------------------------------------------------------------------------------------------------|-------------------------------------------------------------------------------|--------------------------------------------------------|-------------------------|----------------------------------------------|------------------------------------|-------------------------------------------------------------------------------------------------------------------------------------------------------------------------------------------------------------------------------------------------------------------------------------------------------------------------------------------------------------------------------------------------------------------|
| Baker 2010                     | Memory Clinic (USA)                                                  | Exercise vs. Stretching. Duration: 6 months                                                                                     | 19 MCI (Aerobic), 10 MCI (Stretching)                                         | 55-85                                                  | 15:14                   | 27.4                                         | Unknown                            | Cognitive: TMT A&B, Stroop, Task Switching, Verbal Fluency, SDMT, Story Recall, List learning, Delayed-Match-to-Sample; Non-Cognitive: Cardio respiratory fitness (VO <sub>2</sub> peak, treadmill grade, time to exhaustion), blood pressure, adiposity, hyperinsulinemic-euglycemic clamp, blood/plasma: insulin, IGF-I, cortisol levels, BDNF, platelet factor 4, Aβ <sub>40</sub> , Aβ <sub>42</sub> , lipids |
| Buschert 2011 & Forster 2011   | Dementia Research Section & University Based Memory Clinic (Germany) | Multicomponent cognitive intervention vs. Active control. NOTE: Intervention varied for the MCI & AD groups. Duration: 6 months | 24 aMCI (12 intervention, 12 control), 15 Mild AD (8 intervention, 7 control) | 50+                                                    | 19:20                   | 27.4 (1.6)                                   | Either                             | Cognitive: ADAS-Cog, MMSE, TMT A&B, RBANS Story Memory & Recall; Non-cognitive: MADRS, QoL-AD, FDG-PET                                                                                                                                                                                                                                                                                                            |
| Chen 2006                      | Community volunteers (USA)                                           | Donepezil (titrated to 10mg daily over 6 weeks & continued for 6 months) vs. Placebo. Duration: 6 months                        | 4 MCI (Treatment) vs. 7 MCI (Placebo)                                         | M=74.8 (SD=7.4) [Treatment]; M=68.4 (SD=4.0) [Placebo] | 4:7                     | 29.8 (0.5) [Treatment]; 29.6 (0.8) [Placebo] | Either                             | Cognitive: MMSE, HVLT-R; Non-cognitive: Global & regional cerebral blood flow (gCBF, rCBF) on PET during the verbal recall task                                                                                                                                                                                                                                                                                   |
| Chiu 2008                      | Newspaper recruited (1 site; Taiwan)                                 | Omega-3 PUFAs (3 capsules twice daily; 1080mg EPA+720mg DHA) vs. Placebo (Olive oil). Duration: 24 weeks                        | 10 AD/14 MCI (Omega-3); 13 AD/9 MCI (Placebo)                                 | 55-90                                                  | Unknown (for MCI cases) | Unknown                                      | Unknown                            | Cognitive: ADAS-Cog (Cognitive items only), MMSE; Non-cognitive: HDRS (At baseline & week 24 only), CIBIC-plus, erythrocyte membrane fatty acid compositions, fatty acids (e.g., total n3 PUFAs, DHA, EPA, plasma amino acid levels)                                                                                                                                                                              |

| Reference (First Author, Year) | Sample (Country)                                                  | Intervention                                                                                                                               | Number of Subjects Randomised                                                                                                | Age Range                                                  | Gender (M:F) | Mean Baseline MMSE (MCI cases)                   | Single or Multi Domain Amnesic MCI  | Outcomes Tested                                                                                                                                                                                                                                              |
|--------------------------------|-------------------------------------------------------------------|--------------------------------------------------------------------------------------------------------------------------------------------|------------------------------------------------------------------------------------------------------------------------------|------------------------------------------------------------|--------------|--------------------------------------------------|-------------------------------------|--------------------------------------------------------------------------------------------------------------------------------------------------------------------------------------------------------------------------------------------------------------|
| Craft 2012                     | Clinical Research Unit of a Veterans Affairs medical center (USA) | Intranasal insulin (10 or 20 IU twice/day for a total dose of 20 or 40 IU/day) vs. Placebo (Saline twice a day). Duration: 4 months        | 64 MCI [n=21 Placebo, n=20 20-IU, n=23 40-IU] vs. 40 Probable AD (CDR=0.5-1 & MMSE>15) [n=9 Placebo, n=16 20-IU, n=15 40-IU] | 55+                                                        | 59:45        | Unknown                                          | Unknown                             | Cognitive: Story Recall-Delayed, DSRS, ADAS-Cog; Non-cognitive: ADCS-ADL, Plasma biological markers, glucose metabolism, CSF (AB42, AB40, tau protein to AB42 ratio, P181-tau) & FDG-PET cerebral metabolic rate of glucose (CMRG1c) utilisation (Subsample) |
| Doody 2009                     | Multicentre (USA)                                                 | Donepezil (5 mg/day for 6 weeks followed by 10 mg/day) vs. Placebo. Duration: 48 weeks                                                     | 409 MCI (Treatment), 412 MCI (Placebo)                                                                                       | 45-90                                                      | 424:354      | 27.5                                             | Unknown                             | Cognitive: Modified ADAS-Cog, CDR-SB, SDMT, MMSE, Digit Span Backwards; Non-Cognitive: NPI, PDQ [Self and respondent versions], The AD Cooperative Study CGIC-MCI, PGA                                                                                       |
| Forlenza 2011                  | Community Dwelling Out-patients (1 site; Brazil)                  | Low dose lithium (150mg titrated to target serum levels of 0.25-0.5 mmol/l) vs. Placebo. Duration: 1 year                                  | 24 MCI (Lithium) vs. 21 MCI (Placebo)                                                                                        | 60+                                                        | Unknown      | Unknown                                          | Unknown                             | Cognitive: CDR, ADAS-Cog, CERAD Delayed Recall Test, Sequence of Letters & Numbers, TMT A&B; Non-cognitive: CSF concentrations (AB42, total tau, P-tau)                                                                                                      |
| Jean 2010                      | Unknown (Canada)                                                  | Errorless learning + spatial retrieval vs. Errorful learning. All groups given information about memory (n=6 sessions). Duration: 10 weeks | 11 MCI (Training), 11 MCI (Controls)                                                                                         | 50+                                                        | 9:13         | 29.5                                             | Either (12 single; 10 multi-domain) | Cognitive: Face-Name Associations (Training Measure), DRS-2, MMSE, MMQ, RBMT, CVLT-II; Non-cognitive: Anxiety & fatigue, Self-Esteem Scale, NPI, SMAP                                                                                                        |
| Kinsella 2009                  | Memory Clinic (2 sites; Australia)                                | Memory intervention vs. Waitlist control. Duration: 5 weeks                                                                                | 22 (Intervention), 22 (Waitlist)                                                                                             | M=78.9 (SD=5.7) (Intervention); M=74.7 (SD=6.1) (Waitlist) | 19:25        | 25.9 (2.8) [Intervention]; 26.8 (1.8) [Waitlist] | Either                              | Cognitive: RMBT (Reminding Task-Modified), Envelope Task; Non-cognitive: MMQ [Ability Scale, Strategy & Contentment sub-scales], Strategy Knowledge Repertoire                                                                                               |
| Koontz 2005                    | Outpatients (1 site; USA)                                         | Galantamine (Dose escalation: 8, 15, 24 mg/d) vs. Placebo. Duration: 16 weeks                                                              | 8 MCI (Treatment), 11 MCI (Control)                                                                                          | 51-87                                                      | 19:0         | Unknown                                          | Unknown                             | Cognitive: CANTAB (DMS, PAL, PRM, SRM, IED, SOC), CVLT; Non-cognitive: FAQ                                                                                                                                                                                   |



| Reference (First Author, Year) | Sample (Country)                                    | Intervention                                                                                                                                  | Number of Subjects Randomised                                                          | Age Range                                                                                 | Gender (M:F)     | Mean Baseline MMSE (MCI cases) | Single or Multi Domain Amnesic MCI | Outcomes Tested                                                                                                                                                                                                                                                              |
|--------------------------------|-----------------------------------------------------|-----------------------------------------------------------------------------------------------------------------------------------------------|----------------------------------------------------------------------------------------|-------------------------------------------------------------------------------------------|------------------|--------------------------------|------------------------------------|------------------------------------------------------------------------------------------------------------------------------------------------------------------------------------------------------------------------------------------------------------------------------|
| Kotani 2006                    | Out patients<br>Minami-gaoka<br>Hospital (Japan)    | PUFA [ARA & DHA:<br>240mg/day of each: 6<br>capsules/day] vs. Placebo<br>(Olive oil: MCI Placebo<br>group only). Duration: 90<br>days         | 12 (MCI Treatment), 9<br>(MCI Placebo), 10<br>(Organic brain<br>lesions), 8 (Early AD) | M=68.1<br>(SD=6.3) [MCI];<br>M=57.5<br>(SD=12.4)<br>[Organic];<br>M=67.0<br>(SD=6.3) [AD] | 19:20            | Unknown                        | Either                             | Cognitive: RBANS [Form A baseline &<br>Forms A or B randomly used at follow-up];<br>Non-cognitive: Serum chemistry                                                                                                                                                           |
| Mowla 2007                     | Referrals for<br>memory problems<br>(Iran)          | Fluoxetine (10 mg/d<br>baseline, increase by<br>20mg/d in 1-2 weeks) vs.<br>Placebo. Duration: 8 weeks                                        | 33 MCI (Treatment),<br>25 MCI (Control)                                                | 55-75                                                                                     | 56.8%<br>(Women) | 23.9                           | Unknown                            | Cognitive: WMS-III Immediate & Delayed<br>score, Digit Span (forward/backward),<br>WMS-III Family Pictures, MMSE; Non-<br>cognitive: HAM-D, CGI                                                                                                                              |
| Petersen 2005                  | AD Cooperative<br>Sites (69 sites; USA<br>& Canada) | Vitamin E (2000 IU) vs.<br>Donepezil (5mg/d initially<br>to 10mg after 6 weeks) vs.<br>Placebo. Duration: 3 years                             | 253 (Donepezil), 257<br>(Vitamin E), 259<br>(Placebo)                                  | 55-90                                                                                     | 417:352          | 27.3                           | Unknown                            | Cognitive: Dementia diagnosis, MMSE,<br>CDR, GDS, ADAS-Cog (11 & 13 item), New<br>York University Paragraph Recall Test,<br>SDMT, Category Fluency Test, Number<br>Cancellation Test, BNT, Digits Backwards<br>Test, CDT, Maze Tracing Task; Non-<br>cognitive: ADCS-MCI ADL |
| Rapp 2002                      | Community<br>dwelling (USA)                         | Cognitive & behavioural<br>treatment (6 weekly group<br>meetings) vs. Control (No<br>memory education or<br>training). Duration: 6<br>weeks   | 9 MCI (Treatment), 10<br>MCI (Control)                                                 | M=75.1<br>(SD=7.0)                                                                        | 8:11             | 27.6                           | Unknown                            | Cognitive: Word List Recall, Grocery List<br>Task, Names & Faces Task, Wechsler<br>Paragraph Recall Test (Immediate &<br>Delayed); Non-cognitive: MFQ, Memory<br>Controllability Inventory, Profile of Mood<br>States                                                        |
| Rozzini 2007                   | Independent living<br>(2 sites; Italy)              | ChEIs vs. ChEIs + TNP vs.<br>Not treated. Duration: 3<br>blocks of sessions every 2<br>months (Consisting of 20<br>individual sessions/block) | 22 (ChEIs), 15 (ChEIs +<br>TNP), 22 (Control)                                          | 63-78                                                                                     | Unknown          | 26.4                           | Unknown                            | Cognitive: Short Story Recall, Category &<br>Letter Fluency, Raven's Coloured<br>Matrices, Rey's figure (Copy & Delayed),<br>MMSE; Non-cognitive: NPI, GDS-15 Items                                                                                                          |

| Reference (First Author, Year) | Sample (Country)                                                                                     | Intervention                                                                                                                   | Number of Subjects Randomised                                                                     | Age Range | Gender (M:F)                               | Mean Baseline MMSE (MCI cases)                                                                                                 | Single or Multi Domain Amnesic MCI                                 | Outcomes Tested                                                                                                                                                                                                                                                              |
|--------------------------------|------------------------------------------------------------------------------------------------------|--------------------------------------------------------------------------------------------------------------------------------|---------------------------------------------------------------------------------------------------|-----------|--------------------------------------------|--------------------------------------------------------------------------------------------------------------------------------|--------------------------------------------------------------------|------------------------------------------------------------------------------------------------------------------------------------------------------------------------------------------------------------------------------------------------------------------------------|
| Scherder 2005                  | Residents of a combined home for the elderly/nursing home (1 site; Netherlands)                      | Walking Group vs. Hand & Face Exercises vs. Control. Duration: 6 weeks (30 mins/day; 3 times/week)                             | 15 MCI (Walking), 13 MCI (Hand & Face Exercises), 15 MCI (Control)                                | M=86      | 5:38                                       | Used a 12-Item short MMSE version [Range 0-12]. M=9.7 (SD=1.9) [Walking]; M=9.2 (SD=1.3) [Hand/Face]; M=9.9 (SD=1.4) [Control] | Unknown                                                            | Cognitive: Category Naming (Animals, Occupations), TMT A&B, Digit Span (WMS-R), Visual Memory Span (WMS-R), Verbal Learning & Memory Test: List A (Direct Recall, Delayed Recall, Recognition), RBMT (Face & Picture Recognition); Non-cognitive: N/A                        |
| Sherwin 2011                   | Memory clinic                                                                                        | Estrogen (1mg/day micronised E <sub>2</sub> orally) vs. Placebo. Duration: 24 weeks (12 weeks treatment & 12 weeks cross-over) | 22 MCI (Treatment-placebo; GROUP A; 16 analysed) vs. 21 (Placebo-treatment; GROUP B; 12 analysed) | 55-95     | 43:0                                       | 27.0 (2.0) [GROUP A]; 27.8 (2.3) [GROUP B]                                                                                     | Unknown                                                            | Cognitive: Buschke Selective Reminding task, WMS-R: Logical Memory I & II, PAL, Visual Reproduction subtest, Block Design, Waterline Task, Mental Rotation Tasks, Digit Span (Forwards & Backwards), Digit Symbol, Similarities Subtest; Non-cognitive: NPI, hormone levels  |
| Smith 2010 & de Jager 2011     | Single centre (via local newspaper & radio seeking elderly people with memory concerns) (1 site; UK) | Supplementary B vitamins (folic acid 0.8mg/d, vitamin B12 0.5mg/d + vitamin B6 20mg/d) vs. Placebo. Duration: 2 years          | 113 (85 completed MRI protocol) (Treatment), 110 (83 completed MRI protocol) (Placebo)            | 70+       | 66:102                                     | 28.3                                                                                                                           | Amnesic or non-amnesic (single or multi-domain on either subtypes) | Cognitive: MMSE, HVL, CANTAB (PAL, CLOX), TMT A&B, CERAD Category Fluency (Fruits, Vegetables), SDMT, Map Search, TICS-M & clinical outcome measures including the CDR & IQ-CODE; Non-cognitive: MRI rate of atrophy, total level of homocystein, Geriatric Depression Scale |
| Thal 2005                      | Multicentre (46 sites; USA)                                                                          | Rofecoxib 25mg once daily vs. Placebo once daily. Duration: up to 4 years                                                      | 725 (Rofecoxib), 732 (Placebo)                                                                    | 65+       | 31% women (Placebo), 34% women (Rofecoxib) | 27.3                                                                                                                           | Unknown                                                            | Cognitive: AD based on CDR $\geq$ 1 on 2 visits 2 months apart, or clinical appraisal despite CDR=0.5, SRT-Summed, SRT-Delayed, ADAS-Cog, CDR-SB; Non-cognitive: BDRS                                                                                                        |

1  
2  
3  
4  
5  
6  
7  
8  
9  
10  
11  
12  
13  
14  
15  
16  
17  
18  
19  
20  
21  
22  
23  
24  
25  
26  
27  
28  
29  
30  
31  
32  
33  
34  
35  
36  
37  
38  
39  
40  
41  
42  
43  
44  
45  
46  
47  
48  
49

| Reference (First Author, Year) | Sample (Country)                                        | Intervention                                                                                                                                                                                                                                                                                                     | Number of Subjects Randomised                                                     | Age Range | Gender (M:F) | Mean Baseline MMSE (MCI cases) | Single or Multi Domain Amnesic MCI | Outcomes Tested                                                                                                                                                                                                                                                                                                                                                                                                                                                                                                                             |
|--------------------------------|---------------------------------------------------------|------------------------------------------------------------------------------------------------------------------------------------------------------------------------------------------------------------------------------------------------------------------------------------------------------------------|-----------------------------------------------------------------------------------|-----------|--------------|--------------------------------|------------------------------------|---------------------------------------------------------------------------------------------------------------------------------------------------------------------------------------------------------------------------------------------------------------------------------------------------------------------------------------------------------------------------------------------------------------------------------------------------------------------------------------------------------------------------------------------|
| Troyer 2008                    | Physician referrals & newspaper advertisements (Canada) | 10 2-hour sessions over 6 months. Sessions grouped into: 1) info regarding a lifestyle factor that can affect memory (e.g., nutrition), 2) focused memory intervention training, 3) review of information or intervention &/or 4) outcome testing. Participants given weekly home assignments. Duration: 2 years | 24 (Intervention), 24 (Control)                                                   | M=75.4    | 32:36        | 27.8                           | Unknown                            | Cognitive: Memory Toolbox Questionnaire, Self-reported strategy use during memory testing & at home, MMQ [Subscales: Strategy, Contentment, Ability], Impact Rating Scale, Lifestyle Importance Questionnaire & Study created memory tests including: Name, number & wordlist recall; Non-cognitive: Hospital Anxiety & Depression Scale                                                                                                                                                                                                    |
| Van Uffelen 2007, 2008 & 2009  | Community dwelling (Netherlands)                        | Pharmacological + Activity. Two conditions: 1) twice-weekly group based moderate intensity walking programme vs. a low-intensity placebo activity programme & 2) daily vitamin pill containing 5mg folic acid, 0.4mg vitamin B12, 50mg vitamin B6 vs. placebo pill. Duration: 1 year                             | 152 total including: 77 (Walking), 75 (Low intensity), 78 (Vitamin), 74 (Placebo) | 70-80     | 44% women    | Median=29 (all 4 groups)       | Unknown                            | Cognitive: MMSE, AVLT, Verbal Fluency Test (Letter), DSST, Abridged Stroop Color Word Test, IQ-CODE; Non-Cognitive: SF-12, D-QoL, Euro-QoL, Geriatric Depression Scale, accelerometer, cardiovascular endurance (Groningen Fitness test), BMI, BP, blood vitamin levels + plasma concentrations, LASA physical activity questionnaire. In a subsample: Heart rate & measurement of subjective intensity (Borg Scale) (measured at start & during exercise programs and after 6 & 12 months) & the Physical Activity Readiness Questionnaire |

1  
2  
3  
4  
5  
6  
7  
8  
9  
10  
11  
12  
13  
14  
15  
16  
17  
18  
19  
20  
21  
22  
23  
24  
25  
26  
27  
28  
29  
30  
31  
32  
33  
34  
35  
36  
37  
38  
39  
40  
41  
42  
43  
44  
45  
46  
47  
48  
49

| Reference (First Author, Year) | Sample (Country)                                                                                    | Intervention                                                                                                                               | Number of Subjects Randomised                                                  | Age Range | Gender (M:F) | Mean Baseline MMSE (MCI cases) | Single or Multi Domain Amnesic MCI | Outcomes Tested                                                                        |
|--------------------------------|-----------------------------------------------------------------------------------------------------|--------------------------------------------------------------------------------------------------------------------------------------------|--------------------------------------------------------------------------------|-----------|--------------|--------------------------------|------------------------------------|----------------------------------------------------------------------------------------|
| Winblad 2008                   | Multicentre (177 centres). Two studies (one with the addition of MRI) (International: 16 countries) | Galantamine (4mg BID for 1 month then 8mg BID for 1 month (plus 12mg BID if well tolerated)) vs. Placebo. Duration: 24 months (Each study) | Study 1 (494 Galantamine, 496 Control); Study 2 (532 Galantamine, 526 Control) | 50+       | 916:1132     | Unknown                        | Unknown                            | Cognitive: CDR, ADAS-cog adapted for MCI, DSST; Non-cognitive: ADCS-ADL adapted to MCI |

peer review only

**Table 1b** Methods used to map aMCI in included studies

| Reference (First Author, Year) | Role of Clinical Judgement                                                                                                                                 | CRD or other Global score                                                           | Memory Complaint                                              | Objective Deficit                                                                                                                             | Cut-off                                                                                    | Global Cognitive Function                                              | ADL                                                                                                 | Other                                              | Dementia Diagnostic Criteria                                                         |
|--------------------------------|------------------------------------------------------------------------------------------------------------------------------------------------------------|-------------------------------------------------------------------------------------|---------------------------------------------------------------|-----------------------------------------------------------------------------------------------------------------------------------------------|--------------------------------------------------------------------------------------------|------------------------------------------------------------------------|-----------------------------------------------------------------------------------------------------|----------------------------------------------------|--------------------------------------------------------------------------------------|
| Baker 2010                     | Unknown                                                                                                                                                    | DRS                                                                                 | Unknown                                                       | Unknown                                                                                                                                       | Unknown                                                                                    | Unknown                                                                | Unknown                                                                                             | N/A                                                | Unknown                                                                              |
| Buschert 2011 & Forster 2011   | Comprehensive clinical & neurological assessment to support diagnosis of MCI or mild AD                                                                    | For MCI GDS=3; for mild AD GDS=4                                                    | Memory complaint                                              | Impaired on at least one of three memory tests: CERAD Neuropsychological Battery Immediate-recall, Delayed-recall &/or Recognition            | 1.5SD (Age/education adjusted)                                                             | MMSE≥23                                                                | No impairment in daily activities or social functioning in MCI cases with MMSE scores between 23-25 | N/A                                                | DSM-IV/NINCDS-ADRDA criteria for AD                                                  |
| Chen 2006                      | Reviewed all available medical records, current medications & undertook patient examination (for health related inclusion)                                 | N/A                                                                                 | Self-perception of memory loss                                | Impaired on a least one of: Mattis Dementia Rating Scale: Memory subscale, Logical Memory (WMS-III) or Brief Visuospatial Memory Test-Revised | 1SD (Age adjusted based on pre-morbid function)                                            | MMSE & Mattis Dementia Rating Scale total score (within normal limits) | No self-reported difficulties with ADL                                                              | Barona IQ estimate, MMSE, HVLT-R                   | Unknown                                                                              |
| Chiu 2008                      | Completed medical, psychiatric & neuropsychological assessment                                                                                             | N/A                                                                                 | Self or informant                                             | Logical Memory Delayed Recall (WMS-III). Relatively normal performance in non-memory domains                                                  | 1.5SD (Age/education adjusted)                                                             | Unknown                                                                | No impairment (scale not specified)                                                                 | CT scan or HIS (used to exclude vascular dementia) | DSM-IV                                                                               |
| Craft 2012                     | Diagnosis of aMCI by expert consensus based on all available data: cognitive testing, medical history, physical examination, clinical laboratory screening | N/A                                                                                 | Unknown                                                       | Delayed story-recall score                                                                                                                    | 1.5SD (Age/education adjusted for pre-morbid ability [Shipley Vocabulary Test])            | Unknown                                                                | Unknown                                                                                             | Unknown                                            | NINCDS-ADRDA criteria for AD                                                         |
| Doody 2009                     | Unknown                                                                                                                                                    | CDR=0.5 (Memory Box 0.5 or 1; no more than two other Box scores rated as high as 1) | Change from previous functioning corroborated by an informant | CDR Memory Box Score 0.5 or 1, WMS Logical Memory II delayed paragraph recall score                                                           | Education adjusted paragraph recall score: ≤8 (16+ years), ≤4 (8-15 years), ≤2 (0-7 years) | MMSE 24-28 (24-30 before protocol amendment)                           | Unknown                                                                                             | Rosen modified HIS≤4, CT scan                      | Probable/Possible Vascular dementia (NINCDS/ADRDA, DSM-IV) or other form of dementia |

| Reference (First Author, Year) | Role of Clinical Judgement                                       | CRD or other Global score                     | Memory Complaint                                                | Objective Deficit                                                                                                                                                  | Cut-off                        | Global Cognitive Function                                                          | ADL                                                                                                            | Other                                  | Dementia Diagnostic Criteria                                                    |
|--------------------------------|------------------------------------------------------------------|-----------------------------------------------|-----------------------------------------------------------------|--------------------------------------------------------------------------------------------------------------------------------------------------------------------|--------------------------------|------------------------------------------------------------------------------------|----------------------------------------------------------------------------------------------------------------|----------------------------------------|---------------------------------------------------------------------------------|
| Forlenza 2011                  | Unknown                                                          | CDR (cut-off not specified)                   | Unknown                                                         | Unknown                                                                                                                                                            | Unknown                        | Unknown                                                                            | Unknown                                                                                                        | CAMCOG                                 | Unknown                                                                         |
| Jean 2010                      | Neuropsychologist judgement used to properly identify aMCI cases | DRS-2 Score $\geq 7$                          | Difficulty in recall of face-name associations in everyday life | CVLT-II (primarily used for diagnosis of aMCI), Animal Naming, TMT A&B, CDT                                                                                        | 1.5SD (on the CVLT-II)         | Unknown                                                                            | Absence or few problems (SMAF; IADL items score 0 to -8)                                                       | N/A                                    | Possible/probable AD (DSM-IV-TR or NINCDS/ADRDA), or any other form of dementia |
| Kinsella 2009                  | Unknown                                                          | N/A                                           | Complaint by patient &/or informant                             | HVLT-R, RAVLT, Wechsler Logical Prose Passages, Word List Learning or Verbal Paired Associates                                                                     | 1.5SD (Age/education adjusted) | Relatively normal on structured interview (with patient & informant) & on the MMSE | No impairment in personal ADL (clinical interview with the patient & family). IADL could be minimally impaired | WTAR                                   | NINCDS-ADRDA criteria for AD                                                    |
| Koontz 2005                    | Unknown                                                          | N/A                                           | Memory complaints                                               | Unknown                                                                                                                                                            | Age adjusted                   | MMSE $\geq 26$                                                                     | Normal or close to normal                                                                                      | N/A                                    | Unknown                                                                         |
| Kotani 2006                    | Unknown                                                          | N/A                                           | Complaint of amnesia                                            | Total score on 12 indexes (Form A RBANS; Japanese version)) derived from five domains: Immediate & delayed memory, visuospatial/construction, language, attention) | 1.5SD                          | Unknown                                                                            | Unknown                                                                                                        | N/A                                    | NINCDS-ADRDA & NINDS-AIREN                                                      |
| Mowla 2007                     | Unknown                                                          | CDR=0.5                                       | Unknown                                                         | Unknown                                                                                                                                                            | Unknown                        | MMSE (Age/education adjusted)                                                      | Unknown                                                                                                        | N/A                                    | DSM-IV                                                                          |
| Petersen 2005                  | Reviewed clinical & psychometric data to diagnose AD             | CDR=0.5 (& at least 0.5 in the memory domain) | Memory complaint corroborated by informant                      | Paragraph Recall Logical Memory II WMS-R (Immediate & delayed recall score)                                                                                        | 1.5-2SD (Education adjusted)   | Clinical judgement based on CDR, MMSE $\geq 24$ (ADAS-Cog also available)          | Clinical interview with patient & informant (None or minimal)                                                  | Modified HIS $\leq 4$ & HDRS $\leq 12$ | NINCDS-ADRDA criteria for AD                                                    |

| Reference (First Author, Year) | Role of Clinical Judgement                                                                                | CRD or other Global score                                                                                                                                                        | Memory Complaint                                                                              | Objective Deficit                                                                                                    | Cut-off                                                                                                                                                    | Global Cognitive Function                                                 | ADL                                                                                                                           | Other                        | Dementia Diagnostic Criteria |
|--------------------------------|-----------------------------------------------------------------------------------------------------------|----------------------------------------------------------------------------------------------------------------------------------------------------------------------------------|-----------------------------------------------------------------------------------------------|----------------------------------------------------------------------------------------------------------------------|------------------------------------------------------------------------------------------------------------------------------------------------------------|---------------------------------------------------------------------------|-------------------------------------------------------------------------------------------------------------------------------|------------------------------|------------------------------|
| Rapp 2002                      | Unknown                                                                                                   | N/A                                                                                                                                                                              | Self-report (MFQ)                                                                             | CERAD Battery (Verbal fluency, naming, constructional praxis, attention & concentration, executive function, memory) | ≤10th percentile (Scores on non-memory tests normal: >10th percentile)                                                                                     | MMSE>24                                                                   | Self-report of ADL/IADL impairment verified by an informant                                                                   | N/A                          | Self-report of a diagnosis   |
| Rozzini 2007                   | Clinical interview to determine normal general cognitive function, physical functioning & dementia status | CDR=0.5 (Memory box score 0.5 or 1)                                                                                                                                              | Memory complaint corroborated by informant                                                    | Unknown                                                                                                              | Unknown                                                                                                                                                    | Clinical judgement based on CDR=0.5 (Memory box score 0.5 or 1) & MMSE≥24 | No or minimal ADL (including IADL & BADL) determined by clinical interview with patient & informant (reference Lawton & Katz) | Geriatric Depression Scale<5 | NINCDS-ADRDA criteria for AD |
| Scherder 2005                  | Unknown                                                                                                   | N/A                                                                                                                                                                              | Subjective complaint supported by nursing assistant                                           | Memory items of the MMSE                                                                                             | Unknown                                                                                                                                                    | 12-Item MMSE (Cut-off score≥7)                                            | No decline in ADLs                                                                                                            | N/A                          | NINCDS-ADRDA criteria for AD |
| Sherwin 2011                   | Expert evaluation to determine MCI                                                                        | N/A                                                                                                                                                                              | Patient or caregiver report of memory problems                                                | Logical Memory 2 subtest (WMS-R) and/or RAVLT-Delayed recall score                                                   | 1SD (Age adjusted)                                                                                                                                         | MMSE & ADAS-Cog                                                           | Generally intact ADLs determined according to age                                                                             | CIBIC                        | NINCDS-ADRDA criteria for AD |
| Smith 2010 & de Jager 2011     | Unknown                                                                                                   | Informant completed IQ-CODE (short form), EQ-5D (Health Questionnaire) & informant CDR (subject also completed the CDR) [CDR=0.5]. Note: CDR was not used for MCI classification | Subjective concern (based on CAMDEX), that did not interfere with ADL; informant corroborated | TICS-M & CERAD Category Fluency (Animals)                                                                            | 1.5SD. More specifically: 17-29 (/39) on TICS-M, or TICS-M>29 but fluency<19 or TICS-M word recall ≤10/20, or TIC-M<17 but fluency≥19 or word recall≥10/20 | MMSE>24                                                                   | Normal ADL (5 questions relating to ADLs based on the CBI)                                                                    | Geriatric Depression Scale   | DSM-IV                       |

| Reference (First Author, Year) | Role of Clinical Judgement                                                                                       | CRD or other Global score                                                                        | Memory Complaint                                                                                                       | Objective Deficit                                                                                                   | Cut-off                                                             | Global Cognitive Function              | ADL                                                                                                                                                                                                                       | Other                                                                                  | Dementia Diagnostic Criteria                                                              |
|--------------------------------|------------------------------------------------------------------------------------------------------------------|--------------------------------------------------------------------------------------------------|------------------------------------------------------------------------------------------------------------------------|---------------------------------------------------------------------------------------------------------------------|---------------------------------------------------------------------|----------------------------------------|---------------------------------------------------------------------------------------------------------------------------------------------------------------------------------------------------------------------------|----------------------------------------------------------------------------------------|-------------------------------------------------------------------------------------------|
| Thal 2005                      | In some cases the patient was determined by an investigator to have developed dementia despite their CDR results | CDR=0.5 (With memory domain score $\geq 0.5$ ) & BDRS $\leq 3.5$ (no part 1 item score $> 0.5$ ) | Patient report of memory problem or informant report of decline (past year)                                            | AVLT totals $\leq 37$                                                                                               | 1.5SD (AVLT, age-adjusted) for the first 6 months and then 1SD used | MMSE $\geq 24$                         | BDRS-CERAD. Informant based rating of patient's ability to perform ADLs (household tasks/self-care). Required to have BDRS scores $\leq 3.5$ , with no Part 1 item $> 0.5$ (these were excluded due to possible dementia) | Modified HIS $> 4$ , HDS 17-Item version $> 13$                                        | NINCDS-ADRDA criteria for AD                                                              |
| Troyer 2008                    | Clinical evaluation & consensus used to classify aMCI                                                            | N/A                                                                                              | New memory complaint (informant corroborated)                                                                          | HVLT, WMS-Revised Verbal Paired Associates, Brief Visuospatial Memory Test and Rey-Osterreith Complex Figure Recall | Age, education & intellectual function adjusted (1-1.5SD)           | MMSE & DRS-II (Age/education adjusted) | No significant impairment in daily functioning determined by interview with clinician (self & where possible informant interview)                                                                                         | BNT, Digit Span, Rey-Osterreith Complex Figure Copy, TMT B (used for descriptive only) | Consideration of all MCI criteria & hinged on having no significant functional impairment |
| Van Uffelen 2007, 2008 & 2009  | Unknown                                                                                                          | N/A                                                                                              | Strawbridge cognition scale (answer 'yes' to 'do you have memory complaints', or at least twice answering 'sometimes') | 10 Word Learning Test delayed recall scores $\leq 5$ & percentage savings scores $\leq 100$                         | 1SD                                                                 | TICS $\geq 19$ & MMSE $\geq 24$        | No report of ADL disability on the GARS, except item 'taking care of hands & feet'                                                                                                                                        | N/A                                                                                    | Absence of dementia given the following cut-offs: TICS $\geq 19$ +MMSE $\geq 24$          |
| Winblad 2008                   | Unknown                                                                                                          | CDR=0.5 (CDR memory score $\geq 0.5$ )                                                           | A history of gradual onset & slow progression of declining cognitive ability                                           | New York University Paragraph Recall Test                                                                           | Delayed Recall Scores $\leq 10$                                     | CDR                                    | Insufficient impairment in ADL to meet diagnostic criteria for dementia                                                                                                                                                   | N/A                                                                                    | CDR $\geq 1$                                                                              |



1  
2  
3  
4  
5  
6  
7  
8  
9  
10  
11  
12  
13  
14  
15  
16  
17  
18  
19  
20  
21  
22  
23  
24  
25  
26  
27  
28  
29  
30  
31  
32  
33  
34  
35  
36  
37  
38  
39  
40  
41  
42  
43  
44  
45  
46  
47  
48  
49**KEY (Supplementary Tables 1a and 1b)**

**A $\beta$**  Amyloid beta; **AD** Alzheimer's Disease; **ADAS-Cog** Alzheimer's Disease Assessment Scale Cognitive Subscale; **ADCS-ADL** Alzheimer's Disease Cooperative Study-Activities of Daily Living Inventory; **ADL** Activities of Daily Living; **ARA** Arachidonic acid; **AVLT** Auditory Verbal Learning Test; **BADL** Basic Activities of Daily Living; **BDNF** Brain-derived neurotrophic factor; **BDRS** Blessed Dementia Rating Scale; **BDRS-CERAD** Blessed Dementia Rating Scale-CERAD version; **BMI** Body Mass Index; **BNT** Boston Naming Test; **BP** Blood Pressure; **CAMCOG** Cambridge Cognitive Examination; **CAMDEX** Cambridge Mental Disorders of the Elderly Examination; **CANTAB** Cambridge Neuropsychological Test Automated Battery; **CBI** Cambridge Behavioural Inventory; **CDR** Clinical Dementia Rating Scale; **CDR-SB** Clinical Dementia Rating Scale Sum of Boxes; **CDT** Clock Drawing Test; **CERAD** Consortium to Establish a Registry for Alzheimer's Disease; **CGI** Clinical Global Impression; **CGIC-MCI** Clinical Global Impression of Change Scale Scores Designed for Patients with Mild Cognitive Impairment; **ChEIs** Cholinesterase Inhibitors; **CIBIC** Clinician Interview-Based Impression of Change; **CIBIC-plus** Clinician's Interview-Based Impression of Change Scale (including the care-giver supplied information); **CLOX** Clock Drawing Test (CANTAB); **CSF** Cerebral Spinal Fluid; **CVLT** California Verbal Learning Test; **CVLT-II** California Verbal Learning Test-II; **DHA** Docosahexaenoic acid; **DMS** Delayed Matching to Sample; **DRS** Dementia Rating Scale; **DRS-2** Dementia Rating Scale-2; **DSM-IV** Diagnostic and Statistical Manual of Mental Disorders, 4th Edition; **DSRS** Dementia Severity Rating Scale; **DSST** Digit Symbol Substitution Test; **D-QoL** Dementia Quality of Life; **EPA** Eicosapentaenoic acid; **Euro-QoL** Euro Quality of Life; **FAQ** Functional Activities Questionnaire; **FDG-PET** Fluorine-18-Fluorodeoxyglucose Positron Emission Tomography; **GARS** Groningen Activity Restriction Scale; **GDS** Global Deterioration Scale; **GDS-15** 15-item Geriatric Depression Scale; **HAM-D** Hamilton Rating Scale for Depression; **HDRS** Hamilton Depression Rating Scale; **HIS** Hachinski Ischemia Scale; **HVLT** Hopkins Verbal Learning Test; **HVLT-R** Hopkins Verbal Learning Test Revised; **IADL** Instrumental Activities of Daily Living; **IED** Intra-Extra Dimensional Set Shift; **IGF-I** Insulin-like growth factor 1; **IQ-CODE** Informant Questionnaire on Cognitive Decline in the Elderly; **LASA** Longitudinal Aging Study Amsterdam; **M** Mean; **MADRS** Montgomery Asberg Depression Rating Scale; **MFQ** Memory Functioning Questionnaire; **MMQ** Multifactorial Memory Questionnaire; **MMSE** Mini Mental State Examination; **N/A** Not applicable; **NINCDS-ADRDA** National Institute of Neurological and Communicative Disorders and Stroke/Alzheimer's Disease and Related Disorders Association; **NINDS-AIREN** National Institute of Neurological Disorders and Stroke and Association Internationale pour la Recherche et l'Enseignement en Neurosciences; **NPI** Neuropsychiatric Inventory; **PAL** Paired Associates Learning Test; **PDQ** Perceived Deficits Questionnaire; **PGA** Patient Global Assessment; **PRM** Pattern Recognition Memory; **P-tau** Phosphorylated tau; **PUFAs** Polyunsaturated fatty acids; **RAVLT** Rey Auditory Verbal Learning Task; **RBANS** Repeatable Battery for the Assessment of Neuropsychological Status; **RBMT** Rivermead Behavioural Memory Test; **SD** Standard Deviation; **SDMT** Symbol Digit Modalities Test; **SF-12** Psychological Wellbeing Short Form 12; **SMAP** Functional Autonomy Management System; **SOC** Stockings of Cambridge; **SRM** Spatial Recognition Memory; **SRT** Selective Reminding Test; **TICS** Telephone Interview for Cognitive Status; **TICS-M** Telephone interview of cognitive status (modified); **TMT A&B** Trail Making Test (Parts A and B); **TNP** NeuroPsychological training; **QoL-AD** Quality of Life Alzheimer's Disease Scale; **WMS-III** Wechsler Memory Scale-III; **WMS-R** Wechsler Memory Scale-Revised; **WTAR** Wechsler Test of Adult Reading

**Supplementary Table 2** Tasks used to assess the MCI criteria of “objective cognitive decline” (alphabetic order)

| Task                                                                                                                                     | References Used |
|------------------------------------------------------------------------------------------------------------------------------------------|-----------------|
| <b>Brief Visuospatial Memory Test[1] (BVMT)</b>                                                                                          | [2]             |
| <b>California Verbal Learning Test 2nd Edition (CVLT-II)[3]</b>                                                                          | [4]             |
| <b>Clinical Dementia Rating (CDR)[5] Memory Box Score</b>                                                                                | [6-8]           |
| – 0.5-1                                                                                                                                  |                 |
| – ≥0.5                                                                                                                                   |                 |
| <b>Clock Drawing Test (CDT)[9]</b>                                                                                                       | [4]             |
| <b>Consortium to Establish a Registry for Alzheimer’s Disease (CERAD) neuropsychological test-battery[10]</b>                            | [11-14]         |
| – Memory (immediate and delayed)                                                                                                         |                 |
| – Verbal/category fluency                                                                                                                |                 |
| – Naming                                                                                                                                 |                 |
| – Constructional praxis                                                                                                                  |                 |
| – Attention & concentration                                                                                                              |                 |
| – Recognition                                                                                                                            |                 |
| – Executive function                                                                                                                     |                 |
| – 10 Word list test                                                                                                                      |                 |
| <b>Delayed Story Recall</b>                                                                                                              | [15]            |
| – 44 information bits to recall immediately and after 20 minutes delay                                                                   |                 |
| <b>Hopkins Verbal Learning Test Revised (Brief Visuospatial Memory Test–Revised)[16 17]</b>                                              | [2 18 19]       |
| <b>Mattis Dementia Rating Scale (DRS)</b>                                                                                                | [18]            |
| – Memory subscale[20]                                                                                                                    |                 |
| <b>Mini Mental State Examination (MMSE) 12-Item short form[21]</b>                                                                       | [22]            |
| – Memory items                                                                                                                           |                 |
| <b>Repeatable battery for assessment of neuropsychological status (RBANS)[23] [Japanese version] (see[24] for the specific subtests)</b> | [25]            |
| – Immediate and delayed memory                                                                                                           |                 |
| – Visuospatial/construction, language and attention                                                                                      |                 |
| <b>Rey Auditory Verbal Learning Test (RAVLT)[26]</b>                                                                                     | [8 19 27]       |
| <b>Rey-Osterreith Complex Figure Recall[28]</b>                                                                                          | [2]             |
| <b>Semantic and Phonemic Verbal Fluency</b>                                                                                              | [4]             |
| – Animal naming[9]                                                                                                                       |                 |
| <b>Trail Making Test (TMT) of the Delis-Kaplan Executive Function System (D-KEFS)[29]</b>                                                | [4]             |
| <b>Wechsler Memory Scale-Revised (WMS-R)[30]</b>                                                                                         | [2 27]          |
| – Logical Memory II Subtest                                                                                                              |                 |
| – Verbal Paired Associates                                                                                                               |                 |
| <b>Wechsler Memory Scale–III[31]</b>                                                                                                     | [6 18 19 32 33] |
| – Logical Prose Passages                                                                                                                 |                 |
| – Word List Learning                                                                                                                     |                 |
| – Verbal Paired Associates                                                                                                               |                 |
| – Logical Memory (II) Immediate recall and delayed paragraph recall                                                                      |                 |
| <b>New York University (NYU) Paragraph recall test</b>                                                                                   | [7]             |
| – Delayed recall score                                                                                                                   |                 |
| <b>Telephone interview of cognitive status-modified (TICS-M)[34]</b>                                                                     | [13]            |

## Table References

1. Benedict RHB. *Brief Visuospatial Memory Test - Revised* Lutz, FL: Psychological Assessment Resources, 1997.
2. Troyer AK, Murphy KJ, Anderson ND, et al. Changing everyday memory behaviour in amnesic mild cognitive impairment: A randomised controlled trial. *Neuropsychological Rehabilitation* 2008;**18**(1):65-88
3. Delis D, Kramer J, Kaplan E, et al. *California Verbal Learning Test: Adult version manual*. San Antonio, TX: The Psychological Corporation, 1987.
4. Jean L, Simard M, Wiederkehr S, et al. Efficacy of a cognitive training programme for mild cognitive impairment: Results of a randomised controlled study. *Neuropsychological Rehabilitation* 2010;**20**(3):377-405
5. Hughes CP, Berg L, Danziger WL, et al. A new clinical scale for the staging of dementia. *Br J Psychiatry* 1982;**140**:566-72
6. Doody RS, Ferris SH, Salloway S, et al. Donepezil treatment of patients with MCI: A 48-week randomized, placebo-controlled trial. *Neurology* 2009;**72**(18):1555-61
7. Winblad B, Gauthier S, Scinto L, et al. Safety and efficacy of galantamine in subjects with mild cognitive impairment. *Neurology* 2008;**70**(22):2024-35
8. Thal LJ, Ferris SH, Kirby L, et al. A randomized, double-blind, study of rofecoxib in patients with mild cognitive impairment. *Neuropsychopharmacology* 2005;**30**(6):1204-15
9. Strauss E, Sherman EMS, Spreen O. *A Compendium of Neuropsychological Tests: Administration, Norms, and Commentary*. New York, NY: Oxford University Press, 2006.
10. Morris JC, Heyman A, Mohs RC, et al. The Consortium to Establish a Registry for Alzheimer's Disease (CERAD). Part I. Clinical and neuropsychological assessment of Alzheimer's disease. *Neurology* 1989;**39**(9):1159-65
11. Buschert VC, Frieze U, Teipel SJ, et al. Effects of a newly developed cognitive intervention in amnesic mild cognitive impairment and mild Alzheimer's disease: a pilot study. *J Alzheimers Dis* 2011;**25**(4):679-94
12. Rapp S, Brenes G, Marsh AP. Memory enhancement training for older adults with mild cognitive impairment: A preliminary study. *Aging and Mental Health* 2002;**6**(1):5-11
13. Smith AD, Smith SM, de Jager CA, et al. Homocysteine-lowering by b vitamins slows the rate of accelerated brain atrophy in mild cognitive impairment: A randomized controlled trial. *PLoS ONE* 2010;**5**(9):1-10
14. Van Uffelen JGZ, Hopman-Rock M, Chin A Paw MJM, et al. Protocol for Project FACT: A randomised controlled trial on the effect of a walking program and vitamin B supplementation on the rate of cognitive decline and psychosocial wellbeing in older adults with mild cognitive impairment [ISRCTN19227688]. *BMC Geriatrics* 2005;**5**(18):doi:10.1186/471-2318-5-18
15. Craft S, Baker LD, Montine TJ, et al. Intranasal insulin therapy for Alzheimer disease and amnesic mild cognitive impairment: a pilot clinical trial. *Arch Neurol* 2012;**69**(1):29-38
16. Benedict RHB, Schretlen D, Groninger L, et al. Hopkins Verbal Learning Test Revised: Normative Data and Analysis of Inter-Form and Test-Retest Reliability. *The Clinical Neuropsychologist (Neuropsychology, Development and Cognition: Sec* 1998;**12**(1):43-55
17. Brandt J, Benedict RHB. *Hopkins verbal learning test—revised*. Lutz: Psychological Assessment Resources, 2001.
18. Chen X, Magnotta VA, Duff K, et al. Donepezil effects on cerebral blood flow in older adults with mild cognitive deficits. *J Neuropsychiatry Clin Neurosci* 2006;**18**(2):178-85
19. Kinsella GJ, Mullaly E, Rand E, et al. Early intervention for mild cognitive impairment: a randomised controlled trial. *Journal of Neurology, Neurosurgery & Psychiatry* 2009;**80**(7):730-36
20. Lucas JA, Ivnik RJ, Smith GE, et al. Normative data for the Mattis Dementia Rating Scale. *J Clin Exp Neuropsychol* 1998;**20**(4):536-47

- 1
- 2
- 3 21. Braekhus A, Laake K, Engedal K. The Mini-Mental State Examination: identifying the most
- 4 efficient variables for detecting cognitive impairment in the elderly. *J Am Geriatr Soc*
- 5 1992;**40**(11):1139-45
- 6
- 7 22. Scherder EJ, Van Paasschen J, Deijen JB, et al. Physical activity and executive functions in the
- 8 elderly with mild cognitive impairment. *Aging Ment Health* 2005;**9**(3):272-80
- 9
- 10 23. Randolph C. *Repeatable Battery for the Assessment of Neuropsychological Status (RBANS)*. San
- 11 Antonio: Harcourt, TX: The Psychological Corporation, 1998.
- 12
- 13 24. Randolph C, Tierney MC, Mohr E, et al. The Repeatable Battery for the Assessment of
- 14 Neuropsychological Status (RBANS): preliminary clinical validity. *J Clin Exp Neuropsychol*
- 15 1998;**20**(3):310-9
- 16
- 17 25. Kotani S, Sakaguchi E, Warashina S, et al. Dietary supplementation of arachidonic and
- 18 docosahexaenoic acids improves cognitive dysfunction. *Neurosci Res* 2006;**56**(2):159-64
- 19
- 20 26. Schmidt M. *Rey Auditory and verbal learning test: a handbook*. Los Angeles: Western
- 21 Psychological Services, 1996.
- 22
- 23 27. Sherwin BB, Chertkow H, Schipper H, et al. A randomized controlled trial of estrogen treatment
- 24 in men with mild cognitive impairment. *Neurobiol Aging* 2011;**32**(10):1808-17
- 25
- 26 28. Spreen O, Strauss EA. *Compendium of neuropsychological tests. Administration, norms and*
- 27 *commentary (2nd ed.)*. New York: Oxford University Press, 1998.
- 28
- 29 29. Delis DC, Kaplan E, Kramer JH. *The Delis-Kaplan Executive Function System*. San Antonio, TX: The
- 30 Psychological Corporation, 2001.
- 31
- 32 30. Wechsler D. *Wechsler Memory Scale-Revised*. San Antonio, TX: The Psychological Corporation,
- 33 1987.
- 34
- 35 31. Wechsler D. *Wechsler Memory Scale-III*. San Antonio, TX: Psychological Corp, 1997.
- 36
- 37 32. Chiu CC, Su KP, Cheng TC, et al. The effects of omega-3 fatty acids monotherapy in Alzheimer's
- 38 disease and mild cognitive impairment: a preliminary randomized double-blind placebo-
- 39 controlled study. *Prog Neuropsychopharmacol Biol Psychiatry* 2008;**32**(6):1538-44
- 40
- 41 33. Petersen RC, Thomas RG, Grundman M, et al. Vitamin E and donepezil for the treatment of mild
- 42 cognitive impairment. *N Engl J Med* 2005;**352**(23):2379-88
- 43
- 44 34. de Jager CA, Budge MM, Clarke R. Utility of TICS-M for the assessment of cognitive function in
- 45 older adults. *Int J Geriatr Psychiatry* 2003;**18**(4):318-24
- 46
- 47
- 48
- 49
- 50
- 51
- 52
- 53
- 54
- 55
- 56
- 57
- 58
- 59
- 60



## Diagnosing Mild Cognitive Impairment (MCI) in Clinical Trials: A Systematic Review

|                                 |                                                                                                                                                                                                                                                                                                                                                                                                                                                   |
|---------------------------------|---------------------------------------------------------------------------------------------------------------------------------------------------------------------------------------------------------------------------------------------------------------------------------------------------------------------------------------------------------------------------------------------------------------------------------------------------|
| Journal:                        | <i>BMJ Open</i>                                                                                                                                                                                                                                                                                                                                                                                                                                   |
| Manuscript ID:                  | bmjopen-2012-001909.R2                                                                                                                                                                                                                                                                                                                                                                                                                            |
| Article Type:                   | Research                                                                                                                                                                                                                                                                                                                                                                                                                                          |
| Date Submitted by the Author:   | 07-Jan-2013                                                                                                                                                                                                                                                                                                                                                                                                                                       |
| Complete List of Authors:       | Stephan, Blossom; Newcastle University, Institute of Health and Society<br>Minett, Thais; Cambridge University, Department of Public Health and Primary Care<br>Pagett, Emma; Cambridge University, Department of Public Health and Primary Care<br>Siervo, Mario; Newcastle University, Institute of Ageing<br>Brayne, Carol; University of Cambridge, Public Health and Primary Care<br>McKeith, Ian; Newcastle University, Institute of Ageing |
| <b>Primary Subject Heading</b>: | Neurology                                                                                                                                                                                                                                                                                                                                                                                                                                         |
| Secondary Subject Heading:      | Neurology, Geriatric medicine                                                                                                                                                                                                                                                                                                                                                                                                                     |
| Keywords:                       | Dementia < NEUROLOGY, MENTAL HEALTH, NEUROLOGY                                                                                                                                                                                                                                                                                                                                                                                                    |
|                                 |                                                                                                                                                                                                                                                                                                                                                                                                                                                   |

SCHOLARONE™  
Manuscripts

## Diagnosing Mild Cognitive Impairment (MCI) in Clinical Trials: A Systematic Review

Blossom Christa Maree Stephan<sup>1\*</sup>, Thais Minett<sup>2</sup>, Emma Pagett<sup>2</sup>, Mario Siervo<sup>3</sup>, Carol Brayne<sup>2</sup> & Ian G McKeith<sup>3</sup>

1. Institute of Health and Society, Newcastle University, UK
2. Department of Public Health and Primary Care, Cambridge University, UK
3. Institute of Ageing, Newcastle University, UK

**\*Corresponding Author:**

**Blossom Christa Maree Stephan**

Institute of Health and Society  
Newcastle University  
The Baddiley-Clark Building  
Richardson Road  
Newcastle upon Tyne  
NE2 4AX  
United Kingdom  
Ph + 44 (0)191 222 3811

### Article Type Systematic Review

**Word Count** 3,245 (Excluding the Abstract and References)

**Summary** 98

**References** 72

**Figures** 2

**Supplementary Material** 2 Tables

**Keywords** Mild Cognitive Impairment (MCI), Randomised Controlled Trials, Operationalisation, Systematic Review

**ABSTRACT**

**Objective** To describe how criteria for amnesic Mild Cognitive Impairment (aMCI) have been operationalised in randomised controlled clinical trials (RCTs).

**Design** Systematic review.

**Information Sources** EMBASE, PubMed and PSYCHInfo were searched from their inception to February 2012. Electronic clinical trial registries were also searched (February 2012).

**Study Selection** RCTs were included where participant selection was made using Petersen et al (1999) defined aMCI. There was no restriction on intervention type or the outcome tested.

**Data Extraction** For each trial we extracted information on study design, demographics, exclusion criteria and the operationalisation strategy for the five aMCI diagnostic criterion including: (1) memory complain, (2) normal general cognitive function, (3) memory impairment, (4) no functional impairment and (5) no dementia.

**Results** 223 articles and 278 registered trials were reviewed of which 22 met inclusion criteria. Various methods were applied for operationalising aMCI criteria resulting in variability in participant selection. Memory complaint and assessment of general cognitive function were the most consistently measured criteria. There was large heterogeneity in the neuropsychological methods used to determine memory impairment. It was not possible to assess the impact of these differences on case selection accuracy for dementia prediction. Further limitations include selective and unclear reporting of how each of the criteria was measured.

1  
2  
3  
4 **Conclusion** The results highlight the urgent need for a standardised approach to  
5 mapping aMCI. Lack of uniformity in clinical diagnosis however is not exclusively a  
6  
7 problem for MCI but also for other clinical states such as dementia including  
8  
9 Alzheimer’s disease, Lewy Body, frontotemporal or vascular dementia. Defining a  
10  
11 uniform approach to MCI classification, or indeed for any classification concept  
12  
13 within the field of dementia, should be a priority if further trials are to be  
14  
15 undertaken in the older aged population based on these concepts.  
16  
17  
18  
19  
20  
21  
22  
23  
24  
25  
26  
27  
28  
29  
30  
31  
32  
33  
34  
35  
36  
37  
38  
39  
40  
41  
42  
43  
44  
45  
46  
47  
48  
49  
50  
51  
52  
53  
54  
55  
56  
57  
58  
59  
60



## ARTICLE SUMMARY

### Article focus

- Accurate identification of individuals at risk of dementia or with pre-dementia is important for clinical trial enrolment.
- Diagnosis of pre-dementia is usually made using the amnesic form of Mild Cognitive Impairment (aMCI). While specific criteria for implementation exist there is no operationalisation protocol.
- Research Question: How have criteria for aMCI been operationalised in randomised controlled clinical trials?

### Key messages

- Various methods have been applied for operationalising aMCI criteria in randomised controlled clinical trials resulting in variability in participant selection.
- The results highlight the urgent need for a standardised approach to mapping aMCI.
- Lack of specific methods for clinical diagnosis is not a problem unique to the field of MCI. Across studies there continues to be inconsistency in the instruments and methodology used to diagnose Alzheimer's disease and Vascular Dementia, including its prodromal stage, Vascular Cognitive Impairment no Dementia (VCIND). Revision of diagnostic criteria should be a research priority.

**Strengths and limitations**

- The review focuses on pre-dementia defined using aMCI. However, not all clinical trials on pre-dementia cognitive states have used this definition of MCI.
- We chose to focus on aMCI as this is one of the commonly applied definitions in clinical and research practice.

## INTRODUCTION

As new preventative strategies for dementia are developed, methods to select persons accurately for clinical trial involvement will be needed. In this perspective, Mild Cognitive Impairment (MCI), an intermediate state between normal ageing and dementia has become a focus for trials to prevent or delay progression to Alzheimer's Disease. The expectation is that positive results are more likely to be achieved with earlier treatment initiation<sup>1,2</sup>. While several different definitions exist for MCI, Petersen et al<sup>3,4</sup> defined amnesic Mild Cognitive Impairment (aMCI) is often used in clinical and research practice. However, despite being commonly applied, no standardised method for the operationalisation of each of the five component criteria (Figure 1) necessary for an aMCI diagnosis exists, resulting in heterogeneity in diagnostic methods and case ascertainment across studies. Indeed, there are numerous possibilities for the measurement of the five criteria as highlight in Figure 1. The lack of an established diagnostic methodology for identifying cases for clinical trial enrolment is problematic as study specific participant selection raises questions regarding the nature of the sample selected, whilst also making cross study comparison and generalizability of findings difficult.

We undertook a systematic review to explore the methods used to classify aMCI cases, defined using Petersen et al<sup>3</sup> criteria, in randomised controlled clinical trials (RCTs). The focus was on inclusion criteria and variation in the operationalisation of each of the five aMCI component criteria as outlined in Figure 1.

## METHODS

This review has been undertaken with adherence to the PRISMA statement<sup>5</sup>. The review protocol is available on request.

### Search Strategy

EMBASE (including Medline) and PSYCHInfo were searched using the following keywords and using Medical Subject Heading (MeSH) terms: ("mild cognitive impairment" OR MCI) AND ("randomised controlled trial" OR "randomized controlled trial" OR RCT). Articles were searched from inception to 6 June 2011, with the search updated on 21 February 2012. Web based searches, using the term 'mild cognitive impairment' were also undertaken in the ISRCTR trial registry (<http://www.controlled-trials.com>) and on [www.clinicaltrials.gov](http://www.clinicaltrials.gov) (17 February 2012).

Only studies that were published in English were included. Two investigators (BS and TM) independently searched publications using the following inclusion criteria: (1) the study was a RCT; (2) the trial had been completed (was not on-going or terminated) and results published; (3) the authors report selecting participants using the definition of aMCI as reported in Petersen et al (1999), and could include single or multi-domain amnesic MCI subtypes (amendments to criteria were allowed as long as stated and Petersen et al (1999) was referenced); and, (4) the MCI group was analysed separately to the dementia or control groups. The protocol paper or the first publication reporting the primary outcome was selected in case of multiple publications using the same study sample. Titles and abstracts were searched first, followed by the full text of any identified articles. Reviews were also retained and

1  
2  
3  
4 the reference lists of these and each included paper were interrogated.

5  
6 Disagreements were resolved by consensus. Data quality was not assessed as all  
7  
8 included studies were RCTs.  
9  
10

### 11 12 13 **Data Extraction**

14  
15 Data on the lead author, date of publication, study design (country, site, sampling  
16  
17 framework, duration, intervention), demographics (age and gender distributions),  
18  
19 trial exclusion criteria, dementia progression rates, outcomes tested and the  
20  
21 methods used to operationalised each of the five component criterion for the  
22  
23 diagnosis of aMCI were abstracted by two investigators (EP and TM) and checked by  
24  
25 a third (MS).  
26  
27  
28  
29  
30  
31

### 32 33 **RESULTS**

34  
35 A total of 223 articles were identified from the literature search. From the electronic  
36  
37 search 11 trials were identified from the ISRCTR trial registry and 267 from  
38  
39 [www.clinicaltrials.gov](http://www.clinicaltrials.gov). Based on the title-abstract search 84 articles were identified  
40  
41 for full text review. In total, 22 articles met inclusion criteria and were retained for  
42  
43 this review. Figure 2 shows the selection process using the PRISMA (2009) Flow  
44  
45 Diagram. As shown in Figure 2, articles were mainly excluded as the sample did not  
46  
47 appear to be defined using the Petersen et al 1999 criteria or had inadequate details  
48  
49 to support the use of Petersen et al 1999 criteria (e.g., only stated an objective  
50  
51 cognitive deficit), or the article was a review. Supplementary Table 1a summarises  
52  
53 the general characteristics, demographics and outcomes tested in each included  
54  
55  
56  
57  
58  
59  
60

1  
2  
3  
4 article. Supplementary Table 1b summarises the operationalisation protocol used for  
5  
6 identifying aMCI cases in each trial.  
7  
8

9  
10  
11 Trial exclusion criteria varied, but mainly related to cerebrovascular and  
12  
13 cardiovascular disease or health and psychiatric related conditions that could be  
14  
15 associated with cognitive decline. There were also differences in the population  
16  
17 sampled (clinic vs. community), site (single vs. multi-centre), duration (e.g., 90 days  
18  
19 to 4 years), and sample demographics (e.g., age range: 50-90 years). Interventions  
20  
21 included pharmacological agents and supplementation<sup>6-17</sup> (including: donepezil,  
22  
23 galantamine, rofecoxib, fluoxetine, lithium treatment, estrogen treatment [E<sub>2</sub>],  
24  
25 vitamin supplementation (E and B), and supplementation with omega-3 poly  
26  
27 unsaturated fatty acids, arachidonic and docosahexaenoic acids), insulin therapy<sup>18</sup>,  
28  
29 physical activity<sup>19, 20</sup> (e.g., aerobic exercise), cognitive training/rehabilitation  
30  
31 programmes<sup>21-25</sup> (e.g., memory training, strategy learning) and combined therapies  
32  
33 including cholinesterase inhibitor (ChEI) use combined with a cognitive training  
34  
35 program<sup>26</sup>, and physical activity combined with vitamin B supplementation<sup>27</sup>.  
36  
37

38  
39 Outcomes varied extensively across studies and included assessment of cognitive  
40  
41 function (in all studies either as a primary or secondary outcome, with no  
42  
43 neuropsychological assessment applied consistently) in addition to non-cognitive  
44  
45 measures (e.g., vascular health such as blood pressure, quality of life, depression,  
46  
47 cerebrospinal fluid (CSF) biomarkers of Alzheimer's Disease pathology and  
48  
49 neuroimaging). Only five studies reported dementia progression rates all of which  
50  
51  
52  
53  
54  
55  
56  
57  
58  
59  
60

1  
2  
3  
4 varied: 16%/year<sup>9</sup>, 5-6%/year<sup>11</sup>, 24% over one year<sup>16</sup>, 11.9% over a 24-weeks trial<sup>17</sup>  
5  
6  
7 and 15% over four years<sup>12</sup>. Most results were negative.  
8  
9

### 10 11 **Operationalizing MCI Component Criterion**

12  
13  
14 Two studies<sup>16, 19</sup> did not report details of the operationalization protocol for defining  
15  
16 MCI.  
17

#### 18 19 ***Criterion 1: Memory Complaint***

20  
21  
22 Five studies<sup>7, 8, 16, 18, 19</sup> reported no details on how memory complaint was obtained.  
23  
24 The memory complaint was obtained from the subject in four<sup>15, 21, 22, 27</sup> studies while  
25  
26 eleven studies<sup>6, 9-11, 13, 14, 17, 20, 23, 24, 26</sup> utilised subject report and informant  
27  
28 corroboration. One study<sup>25</sup> gave unclear details on who reported the complaint. In  
29  
30 one study<sup>12</sup> this criterion was operationalised using a history of gradual onset and  
31  
32 slow progressive decline in cognitive function, but how this was reported, for  
33  
34 example from the subject or informant was not stated. Three studies<sup>10, 22, 27</sup> used  
35  
36 specific scales rather than a single question to assess memory complaint. Smith et  
37  
38 al<sup>10</sup> used four items from the Cambridge Examination for Mental Disorders  
39  
40 (CAMDEX)<sup>28</sup>. Rapp et al<sup>22</sup> used the Memory Functioning Questionnaire (MFQ)<sup>29</sup>  
41  
42 which is a 64-item questionnaire assessing memory problems and use of mnemonics.  
43  
44 Van Uffelen et al<sup>27</sup> used a positive response to a single item “do you have memory  
45  
46 complaints?” or answering “sometimes” at least twice on the cognition scale of  
47  
48 Strawbridge<sup>30</sup>.  
49  
50  
51  
52  
53  
54  
55  
56  
57  
58  
59  
60

**Criterion 2: General Cognitive Function**

This criterion was the most consistently measured and was typically operationalised using the Mini Mental State Examination (MMSE)<sup>31</sup> score either alone<sup>6-8, 10, 11, 22</sup> or in combination with other measures including: a structured interview with the patient and informant<sup>24</sup>, the Dementia Rating Scale-II<sup>32</sup> (DRS-II)<sup>23</sup>, the Mattis Dementia Rating Scale (DRS)<sup>33</sup> (total score)<sup>14</sup>, the Telephone Interview for Cognitive Status<sup>34</sup> (TICS)<sup>27</sup>, the Clinic Dementia Rating<sup>35</sup> (CDR) score<sup>9, 26</sup> or the Alzheimer's Disease Assessment Scale-Cognitive Subscale<sup>36</sup> (ADAS-Cog) in addition with the Clinician Interview-Based Impression of Change<sup>37</sup> (CIBIC)<sup>17</sup>. One study used only the CDR score of 0.5<sup>12</sup>.

The cut-off chosen for the MMSE varied from 23 to 26. Most studies used a cut-off value of  $\geq 24$ <sup>6, 9-11, 22, 26, 27</sup>, but  $\geq 26$ <sup>7</sup>,  $\geq 23$ <sup>25</sup>, or a score adjusted for age/education<sup>8, 23</sup>, were also used. In one study<sup>6</sup>, the protocol was modified during recruitment and the cut-off was adjusted from 24-30 to 24-28. One study<sup>20</sup> used a 12-Item shortened MMSE with a cut-off score of  $\geq 7$ . Three studies<sup>14, 17, 24</sup> specified the use of the MMSE but did not report a cut-off score. Six studies did not specify operationalisation of this criterion<sup>13, 15, 16, 18, 19, 21</sup>.

**Criterion 3: Object Memory Decline**

Five studies did not specify operationalisation of this criterion<sup>7, 8, 16, 19, 26</sup>. Numerous different tests were used to assess cognition as shown in Supplementary Table 2. In addition to inconsistency in test selection there was no consistency in impairment



1  
2  
3  
4 severity (e.g., 1 standard deviation (SD), 1.5SDs or 2SDs below the mean). Further, it  
5  
6 was not always stated whether cut-off scores for impairment were adjusted for age,  
7  
8 education or pre-morbid ability. In one study<sup>11</sup>, severity was adjusted from 1.5SDs  
9  
10 below the mean (used in the first 6 months) to 1SD below the mean during the  
11  
12 course of screening. Based on the nature of the objective deficit, three studies<sup>14, 21, 24</sup>  
13  
14 reported inclusion of single amnesic or multi-domain amnesic MCI. One study<sup>10</sup>  
15  
16 reported the use of combined amnesic and non-amnesic (single and multi-domain)  
17  
18 cases.  
19  
20  
21  
22  
23  
24

25  
26 In terms of non-memory performance one study<sup>22</sup> reported that this was tested and  
27  
28 required to be unimpaired (defined using a cut-off >10<sup>th</sup> percentile). Another<sup>13</sup>  
29  
30 reported that performance was required to be relatively normal in non-memory  
31  
32 domains. In one study<sup>15</sup> division of cases was unclear; the objective deficit in this  
33  
34 study was defined as impairment on a total score comprising five domains  
35  
36 (immediate & delayed memory, visuospatial/construction, language & attention)  
37  
38 assessed using the Repeatable Battery for the Assessment of Neuropsychological  
39  
40 Status (RBANS)<sup>38</sup>.  
41  
42  
43  
44  
45  
46

#### 47 **Criterion 4: ADL/IADL**

48  
49 Seven studies did not specify operationalisation of this criterion<sup>6, 8, 13, 16, 19</sup>. In twelve  
50  
51 studies<sup>7, 9, 11, 12, 15, 17, 18, 21, 23-27</sup>, minimal or non-significant functional impairment was  
52  
53 allowed. One study required that in MCI cases that had a MMSE score between 23  
54  
55 and 25, cognitive impairments did not significantly interfere with daily activities or  
56  
57  
58  
59  
60

1  
2  
3  
4 social functioning, determined by a caregiver report<sup>25</sup>. This restriction was not  
5  
6 required in MCI cases with a MMSE score  $\geq 26$ .  
7  
8

9  
10  
11 Functional impairment tended to be assessed by self or informant report of difficulty  
12  
13 with ADLs or Basic ADLs. Specific scales were used for functional assessment in some  
14  
15 studies<sup>10, 11, 21, 26, 27</sup> including: the Functional Autonomy Measurement System<sup>39</sup>  
16  
17 (SMAFQ), the Blessed Dementia Rating Scale-CERAD<sup>40</sup> version, the Groningen Activity  
18  
19 Restriction Scale<sup>41</sup> (GARS) and selected items from the Lawton<sup>42</sup> and Katz<sup>43</sup> scales or  
20  
21 items from the Cambridge Behavioural Inventory<sup>44</sup> (CBI). In only two studies did it  
22  
23 appear that no evidence of any functional impairment was allowed; one<sup>10</sup> based on 5  
24  
25 items related to ADLs from the CBI and another<sup>20</sup> specified no decline in ADLs  
26  
27 without their measurement being specified.  
28  
29  
30  
31  
32  
33  
34

### 35 **Criterion 5: Dementia Diagnosis**

36  
37 Three studies did not specify operationalization of this criterion<sup>7, 14, 19</sup>. Fourteen<sup>6, 8-11,</sup>  
38  
39 <sup>13, 15, 17, 18, 20, 21, 24-26</sup> studies used the Diagnostic and Statistical Manual (DSM-III-R/IV-  
40  
41 TR/-IV)<sup>45, 46</sup>, National Institute of Neurological and Communicative Disorders and  
42  
43 Stroke and the Alzheimer's Disease and Related Disorders Association (NINCDS-  
44  
45 ADRDA)<sup>47</sup> criteria or National Institute of Neurological Disorders and Stroke and  
46  
47 Association Internationale pour la Recherche et l'Enseignement en Neurosciences  
48  
49 (NINCDS-AIREN)<sup>48</sup> criteria. Two studies used the CDR score<sup>12, 16</sup> and one each used a  
50  
51 self-report of a diagnosis<sup>22</sup>, clinical judgement<sup>23</sup> or the TICS combined with a MMSE  
52  
53 score  $< 24$ <sup>27</sup>.  
54  
55  
56  
57  
58  
59  
60

### ***Additional Measures***

In some studies, additional measures, generally related to the assessment of global functioning (such as the CDR sum of boxes score) or dementia severity (e.g., from none, mild, moderate and severe) were made in parallel to the mapping of the five aMCI criteria. For example, two studies<sup>19, 21</sup> administered the Dementia Rating Scale (DRS), seven<sup>6, 8-12, 26</sup> the CDR, one<sup>11</sup> the Blessed Dementia Rating Scale<sup>40</sup> (BDRS), one<sup>17</sup> the CIBIC, and one<sup>25</sup> the Global Deterioration Scale<sup>49</sup> (GDS). One study<sup>10, 50</sup> also had informants complete both the Informant Questionnaire on Cognitive Decline in the Elderly<sup>51</sup> (IQCODE-Short form) and EuroQol<sup>52</sup> (EQ-5D), a measure of health status.

### **DISCUSSION**

This review highlights the lack of consistency in MCI case ascertainment in currently completed RCTs. How MCI was diagnosed was not always reported or clear and varying operationalisation protocols make it impossible to determine similarity across the samples recruited in the different trials. A priority for clinical trial research is to agree a uniform set of criteria to operationalise MCI. The recruitment protocols identified in this review could provide the basis for future work to determine best practice (e.g., in terms of testing classification accuracy of the different methods used), in order to inform the development of a consistent recruitment methodology for MCI clinical trials.

1  
2  
3  
4 The review highlights the continuing challenge of operationalising the current  
5  
6 Petersen et al (1999) definition of aMCI. Without a standard operationalisation  
7  
8 protocol for defining aMCI clinical trial recruitment will continue to be variable.  
9  
10  
11 Indeed, within the field of dementia there is a lack of consistency in  
12  
13 operationalisation protocols not only for aMCI, but its associated disorders (e.g.,  
14  
15 Cognitive Impairment no Dementia<sup>53</sup>), dementia and its sub-types (such as  
16  
17 Alzheimer's Disease, Lewy Body dementia, frontotemporal dementia and vascular  
18  
19 dementia), pre-MCI<sup>54</sup> and other pre-dementia states such as VCIND<sup>55</sup>. For some  
20  
21 dementias and their related conditions it may however be difficult and unrealistic to  
22  
23 have one set of operational criteria, precise assessment instruments or cut-off  
24  
25 values. For example, a single set of criteria may not be possible for defining symptom  
26  
27 fluctuations (e.g., as seen in Lewy Body dementia), capturing variability in symptom  
28  
29 profiles (e.g., the different type of aphasic deficit presented in frontotemporal  
30  
31 dementia) or reflecting differences in neuropathological profiles (e.g., for vascular  
32  
33 dementia and VCIND the type and location of vascular damage may result in variable  
34  
35 symptom profiles). Different diagnostic criteria for MCI affect prevalence<sup>56</sup> and  
36  
37 progression<sup>57</sup>. Similarly for dementia different criteria have been found to affect  
38  
39 prevalence<sup>58, 59</sup>. Inconsistency in case classification for any health condition,  
40  
41 whether it is within the field of dementia or any other disease category, can have  
42  
43  
44  
45  
46  
47  
48  
49  
50  
51  
52  
53  
54  
55  
56  
57  
58  
59  
60

With regard to aMCI, consensus needs to be reached on five core issues relating to the measurement of each of the component criteria. First, whether memory

1  
2  
3  
4 complaint should be self and/or information reported and how it should be assessed  
5  
6 (e.g., single or multiple items). Second, how global cognitive function should be  
7  
8 assessed with possible measures including the MMSE, CDR and Global Deterioration  
9  
10 Scale, and what the best cut-off score is (within and across cultures). Third, which  
11  
12 neuropsychological test(s) should be used to assess memory<sup>60</sup>, what should be the  
13  
14 severity of cognitive impairment (1SD, 1.5SD) and whether covariate adjustment is  
15  
16 needed. In addition, is the question of whether both memory and non-memory  
17  
18 domains should be tested. Possible tests identified in this review are outlined in  
19  
20 Supplementary Table 2. Fourth, how functional performance should be assessed (the  
21  
22 type of questions), the nature of the task (e.g., instrumental ADLs, basic ADLs),  
23  
24 reporting (e.g., patient, informant or clinician) and what is the maximum level of  
25  
26 impairment (e.g., none, mild, moderate or severe difficulty or significant difficulty in  
27  
28 some areas but not in others). Fifth, how dementia should be defined for exclusion  
29  
30 with examples used including: the DSM or NINCDS-ADRDA criteria, the CDR sum of  
31  
32 boxes score  $\geq 1$  or via screening instruments (e.g., the Telephone Screening  
33  
34 Instrument). It should be noted that aMCI is not always operationalised as originally  
35  
36 specified (e.g., permissible significant functional impairment in some studies) and  
37  
38 consensus needs to be reached on whether all five criterion are necessary. Further,  
39  
40 whether modifications (if any) to criteria can be made and the implications of making  
41  
42 modifications, for example, in terms of dementia predictability and effect on  
43  
44 generalizability, needs to be established.  
45  
46  
47  
48  
49  
50  
51  
52  
53  
54  
55  
56  
57  
58  
59  
60

1  
2  
3  
4 Decision also needs to be reached on the best treatment target. The impairment  
5  
6 captured in aMCI is not always progressive, with a proportion of cases reverting to  
7  
8 normal or remaining stable at follow-up, particularly when mapped in population-  
9  
10 based studies<sup>57, 61</sup>. Indeed, symptoms of MCI are not always a consequence of  
11  
12 Alzheimer's pathology, but rather can have multiple aetiologies such as depression  
13  
14 or vascular disease each with different outcomes (e.g., dementia progression,  
15  
16 improvement with treatment for the underlying health symptoms)<sup>62, 63</sup>. Better  
17  
18 methods are needed to determine the underlying cause of disease in this patient  
19  
20 group to accurately identify those individuals whose MCI is associated with  
21  
22 Alzheimer's Disease. One possibility could be defining aMCI as in the Alzheimer's  
23  
24 Disease Cooperative Study trial<sup>9</sup> (based on a subjective memory complaint, MMSE  
25  
26 score, impaired performance on the Logical Memory II Subscale, no functional  
27  
28 impairment and a CDR score of 0.5) as strict implementation of this methodology  
29  
30 has been found to result in a consistent rate of dementia progression (approximately  
31  
32 16%/year) across studies, including the multicentre Alzheimer's Disease  
33  
34 Neuroimaging Initiative<sup>64</sup>. Further research is needed to test this method of  
35  
36 operationalisation across cohorts (clinical and population based; across countries)  
37  
38 and calculate prevalence and longitudinal course in order to determine  
39  
40 generalisability of these findings. Such results could have important implications in  
41  
42 terms of identifying a standard protocol for all future aMCI clinical trials.  
43  
44  
45  
46  
47  
48  
49  
50

51  
52  
53 A recent task force on designing trials in early (pre-dementia) AD argues for the use  
54  
55 of aMCI criteria in combination with biomarkers to improve case selection for clinical  
56  
57  
58  
59  
60

1  
2  
3  
4 trials<sup>2, 65</sup>. Suggestions for possible biomarkers have included hippocampal or whole  
5  
6 brain atrophy, CSF Aβ42 levels, PiB imaging, genetic screening (APOE e4 status) or  
7  
8 behavioural deficits<sup>66-68</sup>, as each has been associated with dementia. Further, how  
9  
10 dementia and AD are defined is currently undergoing revision, with the aim of  
11  
12 improved stratification of patients<sup>65, 69</sup>. Where MCI now sits in the ever changing  
13  
14 “lexicon” of AD (i.e., given there is currently no concrete border between preclinical  
15  
16 and clinical disease) will have implications for who is targeted for clinical trial  
17  
18 recruitment. For example, MCI as defined by Petersen et al criteria may no longer be  
19  
20 considered at-risk, but as already AD, and encompassed in the new term “prodromal  
21  
22 AD”; an early symptomatic stage pre-dementia where a patient shows evidence of  
23  
24 memory impairment and positive ratings on pathophysiological and topographical  
25  
26 markers of AD<sup>65</sup>. Clinical trial research may therefore shift some focus to  
27  
28 asymptomatic at-risk states (e.g., pre-MCI) where individuals are biomarker positive  
29  
30 for AD but are otherwise healthy. However, like aMCI efforts are needed to  
31  
32 standardise criteria and develop an operational protocol for any new stage of  
33  
34 disease (e.g., prodromal AD and pre-MCI) and undertake validation across settings  
35  
36 including oldest-old age groups and populations (vs. clinical samples).  
37  
38  
39  
40  
41  
42  
43  
44  
45  
46

47 The review should be viewed in light of some limitations. First, we choose to focus  
48  
49 on Petersen et al defined aMCI, as this is one of the commonly applied definitions in  
50  
51 clinical and research practice. However, not all trials on preclinical cognitive states  
52  
53 have used this definition of MCI with some studies defining intermediate cognitive  
54  
55 states using simply a MMSE score or using criteria that have made refinements to  
56  
57  
58  
59  
60

1  
2  
3  
4 the original aMCI criteria<sup>70, 71</sup>. The main change has been in the acceptable level of  
5  
6 functional impairment: from none to allowing minor problems, particularly in  
7  
8 complex activities such as for example, account keeping. Different definitions of MCI  
9  
10 have different prevalence estimates<sup>56</sup> and also vary in their risk of dementia  
11  
12 progression (e.g., more extensive patterns of cognitive changes have been  
13  
14 associated with greater progression of MCI to dementia)<sup>57</sup>. Subtypes have also been  
15  
16 defined depending on the neuropsychological profile including amnesic and non-  
17  
18 amnesic single or multi-domain MCI, and multi-domain combined MCI that includes  
19  
20 both memory and non-memory deficits. Which, if any, of the many different  
21  
22 criteria<sup>72</sup> and sub-types should be adopted in RCTs or whether no distinction should  
23  
24 be made between MCI and AD during recruitment<sup>2</sup>, requires further discussion.  
25  
26  
27  
28  
29  
30  
31

### 32 **Conclusion**

33  
34  
35 Much work needs to be done on the characterisation of individuals at-risk of  
36  
37 dementia for clinical trial recruitment. Within this framework attention is being  
38  
39 focused on redefining the earliest stages of disease and generating new definitions  
40  
41 of what constitutes “prodromal/pre-dementia” and “at-risk”. Standardisation in  
42  
43 definition and development of an operational protocol will result in improvements in  
44  
45 diagnosis and clinical trial methodology.  
46  
47  
48  
49  
50  
51  
52  
53  
54  
55  
56  
57  
58  
59  
60



## References

- [1] Petersen RC. Mild cognitive impairment clinical trials. *Nat Rev Drug Discov*. 2003;**2**: 646-653.
- [2] Aisen PS, Andrieu S, Sampaio C, *et al*. Report of the task force on designing clinical trials in early (predementia) AD. *Neurology*. 2011;**76**: 280-286.
- [3] Petersen RC, Smith GE, Waring SC, *et al*. Mild Cognitive Impairment: Clinical Characterization and Outcome. *Arch Neurol*. 1999;**56**: 303-308.
- [4] Petersen RC, Doody R, Kurz A, *et al*. Current concepts in mild cognitive impairment. *Arch Neurol*. 2001;**58**: 1985-1992.
- [5] Moher D, Liberati A, Tetzlaff J, *et al*. Preferred Reporting Items for Systematic Reviews and Meta-Analyses: The PRISMA Statement. *PLoS Med*. 2009;**6**: e1000097.
- [6] Doody RS, Ferris SH, Salloway S, *et al*. Donepezil treatment of patients with MCI: A 48-week randomized, placebo-controlled trial. *Neurology*. 2009;**72**: 1555-1561.
- [7] Koontz J, Baskys A. Effects of galantamine on working memory and global functioning in patients with mild cognitive impairment: A double-blind placebo-controlled study. *American Journal of Alzheimer's Disease and other Dementias*. 2005;**20**: 295-302.
- [8] Mowla A, Mosavinasab M, Pani A. Does fluoxetine have any effect on the cognition of patients with mild cognitive impairment?: A double-blind, placebo-controlled, clinical trial. *Journal of Clinical Psychopharmacology*. 2007;**27**: 67-70.
- [9] Petersen RC, Thomas RG, Grundman M, *et al*. Vitamin E and donepezil for the treatment of mild cognitive impairment. *N Engl J Med*. 2005;**352**: 2379-2388.
- [10] Smith AD, Smith SM, de Jager CA, *et al*. Homocysteine-lowering by b vitamins slows the rate of accelerated brain atrophy in mild cognitive impairment: A randomized controlled trial. *PLoS ONE*. 2010;**5**: 1-10.
- [11] Thal LJ, Ferris SH, Kirby L, *et al*. A randomized, double-blind, study of rofecoxib in patients with mild cognitive impairment. *Neuropsychopharmacology*. 2005;**30**: 1204-1215.
- [12] Winblad B, Gauthier S, Scinto L, *et al*. Safety and efficacy of galantamine in subjects with mild cognitive impairment. *Neurology*. 2008;**70**: 2024-2035.
- [13] Chiu CC, Su KP, Cheng TC, *et al*. The effects of omega-3 fatty acids monotherapy in Alzheimer's disease and mild cognitive impairment: a preliminary randomized double-blind placebo-controlled study. *Prog Neuropsychopharmacol Biol Psychiatry*. 2008;**32**: 1538-1544.
- [14] Chen X, Magnotta VA, Duff K, *et al*. Donepezil effects on cerebral blood flow in older adults with mild cognitive deficits. *J Neuropsychiatry Clin Neurosci*. 2006;**18**: 178-185.
- [15] Kotani S, Sakaguchi E, Warashina S, *et al*. Dietary supplementation of arachidonic and docosahexaenoic acids improves cognitive dysfunction. *Neurosci Res*. 2006;**56**: 159-164.
- [16] Forlenza OV, Diniz BS, Radanovic M, *et al*. Disease-modifying properties of long-term lithium treatment for amnesic mild cognitive impairment: randomised controlled trial. *Br J Psychiatry*. 2011;**198**: 351-356.

- 1  
2  
3  
4 [17] Sherwin BB, Chertkow H, Schipper H, *et al.* A randomized controlled trial of  
5 estrogen treatment in men with mild cognitive impairment. *Neurobiol Aging*.  
6 2011;**32**: 1808-1817.
- 7 [18] Craft S, Baker LD, Montine TJ, *et al.* Intranasal insulin therapy for Alzheimer  
8 disease and amnesic mild cognitive impairment: a pilot clinical trial. *Arch Neurol*.  
9 2012;**69**: 29-38.
- 10 [19] Baker LD, Frank LL, Foster-Schubert K, *et al.* Effects of aerobic exercise on  
11 mild cognitive impairment: a controlled trial. *Arch Neurol*. 2010;**67**: 71-79.
- 12 [20] Scherder EJ, Van Paasschen J, Deijen JB, *et al.* Physical activity and executive  
13 functions in the elderly with mild cognitive impairment. *Aging Ment Health*. 2005;**9**:  
14 272-280.
- 15 [21] Jean L, Simard M, Wiederkehr S, *et al.* Efficacy of a cognitive training  
16 programme for mild cognitive impairment: Results of a randomised controlled study.  
17 *Neuropsychological Rehabilitation*. 2010;**20**: 377-405.
- 18 [22] Rapp S, Brenes G, Marsh AP. Memory enhancement training for older adults  
19 with mild cognitive impairment: A preliminary study. *Aging and Mental Health*.  
20 2002;**6**: 5-11.
- 21 [23] Troyer AK, Murphy KJ, Anderson ND, *et al.* Changing everyday memory  
22 behaviour in amnesic mild cognitive impairment: A randomised controlled trial.  
23 *Neuropsychological Rehabilitation*. 2008;**18**: 65-88.
- 24 [24] Kinsella GJ, Mullaly E, Rand E, *et al.* Early intervention for mild cognitive  
25 impairment: a randomised controlled trial. *Journal of Neurology, Neurosurgery &*  
26 *Psychiatry*. 2009;**80**: 730-736.
- 27 [25] Buschert VC, Friese U, Teipel SJ, *et al.* Effects of a newly developed cognitive  
28 intervention in amnesic mild cognitive impairment and mild Alzheimer's disease: a  
29 pilot study. *J Alzheimers Dis*. 2011;**25**: 679-694.
- 30 [26] Rozzini L, Costardi D, Chilovi V, *et al.* Efficacy of cognitive rehabilitation in  
31 patients with mild cognitive impairment treated with cholinesterase inhibitors.  
32 *International Journal of Geriatric Psychiatry*. 2007;**22**: 356-360.
- 33 [27] Van Uffelen JGZ, Hopman-Rock M, Chin A Paw MJM, *et al.* Protocol for  
34 Project FACT: A randomised controlled trial on the effect of a walking program and  
35 vitamin B supplementation on the rate of cognitive decline and psychosocial  
36 wellbeing in older adults with mild cognitive impairment [ISRCTN19227688]. *BMC*  
37 *Geriatrics*. 2005;**5**: doi:10.1186/1471-2318-1185-1118.
- 38 [28] Roth M, Tym E, Mountjoy CQ, *et al.* CAMDEX: The cambridge examination for  
39 mental disorders of the elderly. Cambridge: Cambridge University Press, 1988.
- 40 [29] Gilewski MJ, Zelinski EM. Memory Functioning Questionnaire (MFQ).  
41 *Psychopharmacology bulletin*. 1988;**24**: 665-670.
- 42 [30] Strawbridge WJ, Shema SJ, Balfour JL, *et al.* Antecedents of frailty over three  
43 decades in an older cohort. *The journals of gerontology Series B, Psychological*  
44 *sciences and social sciences*. 1998;**53**: S9-16.
- 45 [31] Folstein MF, Folstein SE, McHugh PR. "Mini-mental state". A practical method  
46 for grading the cognitive state of patients for the clinician. *J Psychiatr Res*. 1975;**12**:  
47 189-198.
- 48  
49  
50  
51  
52  
53  
54  
55  
56  
57  
58  
59  
60

- 1  
2  
3  
4  
5 [32] Jurica PJ, Leitten CL, Mattis S. *Dementia Rating Scale-2: Professional manual*.  
6 Lutz: Psychological Assessment Resources, 2001.
- 7 [33] Mattis S. *Dementia Rating Scale: Professional manual*. Odessa, FL:  
8 Psychological Assessment Resources, 1988.
- 9 [34] Brandt J, Spencer M, Folstein M. The telephone interview for cognitive status.  
10 *Neuropsychiatry, Neuropsychology and Behavioral Neurology* 1988;**1**: 111-117.
- 11 [35] Hughes CP, Berg L, Danziger WL, *et al*. A new clinical scale for the staging of  
12 dementia. *Br J Psychiatry*. 1982;**140**: 566-572.
- 13 [36] Rosen WG, Mohs RC, Davis KL. A new rating scale for Alzheimer's disease. *The*  
14 *American journal of psychiatry*. 1984;**141**: 1356-1364.
- 15 [37] Schneider LS, Olin JT, Doody RS, *et al*. Validity and reliability of the  
16 Alzheimer's Disease Cooperative Study-Clinical Global Impression of Change. The  
17 Alzheimer's Disease Cooperative Study. *Alzheimer disease and associated disorders*.  
18 1997;**11 Suppl 2**: S22-32.
- 19 [38] Randolph C, Tierney MC, Mohr E, *et al*. The Repeatable Battery for the  
20 Assessment of Neuropsychological Status (RBANS): preliminary clinical validity. *J Clin*  
21 *Exp Neuropsychol*. 1998;**20**: 310-319.
- 22 [39] Hebert R, Carrier R, Bilodeau A. The Functional Autonomy Measurement  
23 System (SMAF): description and validation of an instrument for the measurement of  
24 handicaps. *Age Ageing*. 1988;**17**: 293-302.
- 25 [40] Morris JC, Mohs RC, Rogers H, *et al*. Consortium to establish a registry for  
26 Alzheimer's disease (CERAD) clinical and neuropsychological assessment of  
27 Alzheimer's disease. *Psychopharmacology bulletin*. 1988;**24**: 641-652.
- 28 [41] Kempen GI, Miedema I, Ormel J, *et al*. The assessment of disability with the  
29 Groningen Activity Restriction Scale. Conceptual framework and psychometric  
30 properties. *Soc Sci Med*. 1996;**43**: 1601-1610.
- 31 [42] Lawton MP, Brody EM. Assessment of older people: self-maintaining and  
32 instrumental activities of daily living. *Gerontologist*. 1969;**9**: 179-186.
- 33 [43] Katz S, Downs TD, Cash HR, *et al*. Progress in development of the index of  
34 ADL. *Gerontologist*. 1970;**10**: 20-30.
- 35 [44] Wedderburn C, Wear H, Brown J, *et al*. The utility of the Cambridge  
36 Behavioural Inventory in neurodegenerative disease. *J Neurol Neurosurg Psychiatry*.  
37 2008;**79**: 500-503.
- 38 [45] American Psychiatric Association. *Diagnostic and Statistical Manual of Mental*  
39 *Disorders (Third Edition, revised) (DSM-III-R)*. Washington, DC: APA, 1987.
- 40 [46] American Psychiatric Association. *Diagnostic and Statistical Manual of Mental*  
41 *Disorders (Fourth Edition) (Text Revision: DMS-IV-TR)* Arlington, VA: American  
42 Psychiatric Publishing Inc, 2000.
- 43 [47] McKhann G, Drachman D, Folstein M, *et al*. Clinical diagnosis of Alzheimer's  
44 disease: report of the NINCDS-ADRDA Work Group under the auspices of  
45 Department of Health and Human Services Task Force on Alzheimer's Disease.  
46 *Neurology*. 1984;**34**: 939-944.
- 47 [48] Roman GC, Tatemichi TK, Erkinjuntti T, *et al*. Vascular dementia: diagnostic  
48 criteria for research studies. Report of the NINDS-AIREN International Workshop.  
49 *Neurology*. 1993;**43**: 250-260.
- 50  
51  
52  
53  
54  
55  
56  
57  
58  
59  
60

- 1  
2  
3  
4 [49] Reisberg B, Ferris SH, de Leon MJ, *et al.* The Global Deterioration Scale for  
5 assessment of primary degenerative dementia. *The American journal of psychiatry.*  
6 1982;**139**: 1136-1139.
- 7 [50] de Jager CA, Oulhaj A, Jacoby R, *et al.* Cognitive and clinical outcomes of  
8 homocysteine-lowering B-vitamin treatment in mild cognitive impairment: a  
9 randomized controlled trial. *International Journal of Geriatric Psychiatry.* 2012;**26**:  
10 592-600.
- 11 [51] Jorm AF. The Informant Questionnaire on cognitive decline in the elderly  
12 (IQCODE): a review. *Int Psychogeriatr.* 2004;**16**: 275-293.
- 13 [52] EuroQol Group. EuroQol-A new facility for the measurement of health-  
14 related quality of life. *Health Policy.* 1990;**16**: 199-208.
- 15 [53] Ebly EM, Hogan DB, Parhad IM. Cognitive impairment in the nondemented  
16 elderly. Results from the Canadian Study of Health and Aging. *Arch Neurol.* 1995;**52**:  
17 612-619.
- 18 [54] Duara R, Loewenstein DA, Greig MT, *et al.* Pre-MCI and MCI:  
19 neuropsychological, clinical, and imaging features and progression rates. *The*  
20 *American journal of geriatric psychiatry : official journal of the American Association*  
21 *for Geriatric Psychiatry.* 2011;**19**: 951-960.
- 22 [55] Stephan BC, Matthews FE, Khaw KT, *et al.* Beyond mild cognitive impairment:  
23 vascular cognitive impairment, no dementia (VCIND). *Alzheimer's research &*  
24 *therapy.* 2009;**1**: 4.
- 25 [56] Stephan BC, Matthews FE, McKeith IG, *et al.* Early cognitive change in the  
26 general population: how do different definitions work? *J Am Geriatr Soc.* 2007;**55**:  
27 1534-1540.
- 28 [57] Matthews FE, Stephan BC, McKeith IG, *et al.* Two-year progression from mild  
29 cognitive impairment to dementia: to what extent do different definitions agree? *J*  
30 *Am Geriatr Soc.* 2008;**56**: 1424-1433.
- 31 [58] Erkinjuntti T, Ostbye T, Steenhuis R, *et al.* The effect of different diagnostic  
32 criteria on the prevalence of dementia. *N Engl J Med.* 1997;**337**: 1667-1674.
- 33 [59] Wancata J, Borjesson-Hanson A, Ostling S, *et al.* Diagnostic criteria influence  
34 dementia prevalence. *The American journal of geriatric psychiatry : official journal of*  
35 *the American Association for Geriatric Psychiatry.* 2007;**15**: 1034-1045.
- 36 [60] Lonie JA, Tierney KM, Ebmeier KP. Screening for mild cognitive impairment: a  
37 systematic review. *Int J Geriatr Psychiatry.* 2009;**24**: 902-915.
- 38 [61] Mitchell AJ, Shiri-Feshki M. Rate of progression of mild cognitive impairment  
39 to dementia--meta-analysis of 41 robust inception cohort studies. *Acta psychiatrica*  
40 *Scandinavica.* 2009;**119**: 252-265.
- 41 [62] DeCarli C. Mild cognitive impairment: prevalence, prognosis, aetiology, and  
42 treatment. *The Lancet Neurology.* 2003;**2**: 15-21.
- 43 [63] Panza F, Capurso C, D'Introno A, *et al.* Heterogeneity of mild cognitive  
44 impairment and other predementia syndromes in progression to dementia.  
45 *Neurobiology of Aging.* 2007;**28**: 1631-1632.
- 46 [64] Petersen RC, Aisen PS, Beckett LA, *et al.* Alzheimer's Disease Neuroimaging  
47 Initiative (ADNI): clinical characterization. *Neurology.* 2010;**74**: 201-209.
- 48  
49  
50  
51  
52  
53  
54  
55  
56  
57  
58  
59  
60

- 1  
2  
3  
4 [65] Dubois B, Feldman HH, Jacova C, *et al.* Revising the definition of Alzheimer's  
5 disease: a new lexicon. *The Lancet Neurology*. 2010;**9**: 1118-1127.  
6 [66] Whitehair DC, Sherzai A, Emond J, *et al.* Influence of apolipoprotein e  
7 (epsilon)4 on rates of cognitive and functional decline in mild cognitive impairment.  
8 *Alzheimer's and Dementia*. 2010;**6**: 412-419.  
9 [67] Jack CR, Jr., Knopman DS, Jagust WJ, *et al.* Hypothetical model of dynamic  
10 biomarkers of the Alzheimer's pathological cascade. *Lancet Neurol*. 2010;**9**: 119-128.  
11 [68] Gauthier S, Reisberg B, Zaudig M, *et al.* Mild cognitive impairment. *Lancet*.  
12 2006;**367**: 1262-1270.  
13 [69] Sperling RA, Aisen PS, Beckett LA, *et al.* Toward defining the preclinical stages  
14 of Alzheimer's disease: recommendations from the National Institute on Aging-  
15 Alzheimer's Association workgroups on diagnostic guidelines for Alzheimer's disease.  
16 *Alzheimers Dement*. 2011;**7**: 280-292.  
17 [70] Winblad B, Palmer K, Kivipelto M, *et al.* Mild cognitive impairment--beyond  
18 controversies, towards a consensus: report of the International Working Group on  
19 Mild Cognitive Impairment. *J Intern Med*. 2004;**256**: 240-246.  
20 [71] Albert MS, DeKosky ST, Dickson D, *et al.* The diagnosis of mild cognitive  
21 impairment due to Alzheimer's disease: recommendations from the National  
22 Institute on Aging-Alzheimer's Association workgroups on diagnostic guidelines for  
23 Alzheimer's disease. *Alzheimers Dement*. 2011;**7**: 270-279.  
24 [72] Matthews FE, Stephan BC, Bond J, *et al.* Operationalization of mild cognitive  
25 impairment: a graphical approach. *PLoS Med*. 2007;**4**: 1615-1619.  
26  
27  
28  
29  
30  
31  
32  
33  
34  
35  
36  
37  
38  
39  
40  
41  
42  
43  
44  
45  
46  
47  
48  
49  
50  
51  
52  
53  
54  
55  
56  
57  
58  
59  
60

**Additional Files Attached**

**Figure 1** Petersen criteria for amnesic MCI (aMCI)

**Figure 2** PRISMA (2009) flow diagram of article selection

**Supplementary Table 1a** Characteristics of included studies

**Supplementary Table 1b** Methods used to map aMCI in included studies

**Supplementary Table 2** Tasks used to assess the MCI criteria of “objective cognitive decline” (alphabetic order)

For peer review only

1  
2  
3  
4  
5  
6  
7  
8  
9  
10  
11  
12  
13  
14  
15  
16  
17  
18  
19  
20  
21  
22  
23  
24  
25  
26  
27  
28  
29  
30  
31  
32  
33  
34  
35  
36  
37  
38  
39  
40  
41  
42  
43  
44  
45  
46  
47  
48  
49  
50  
51  
52  
53  
54  
55  
56  
57  
58  
59  
60

**Acknowledgements****Author Contributions**

ICMJE authorship met by all authors. BS and TM designed the review. BS, TM, EP and MS contributed to review article selection, data extraction and writing the results section. BS, TM and MS wrote the first draft of the paper. CB and IM made substantial contribution to the intellectual content. All authors contributed to the final version and approve its submission.

**Funding Statement**

This research received no specific grant from any funding agency in the public, commercial or not-for-profit sectors. The authors were personally salaried by their institutions during the period of writing (though no specific salary was set aside or given for the writing of this paper).

**Competing Interests**

No author has a conflict of interest to declare.

**Data Sharing Statement**

The manuscript is a systematic review. The review protocol is available on request from the corresponding author.

## Diagnosing Mild Cognitive Impairment (MCI) in Clinical Trials: A Systematic Review

Blossom Christa Maree Stephan<sup>1\*</sup>, Thais Minett<sup>2</sup>, Emma Pagett<sup>2</sup>, Mario Siervo<sup>3</sup>, Carol Brayne<sup>2</sup> & Ian G McKeith<sup>3</sup>

1. Institute of Health and Society, Newcastle University, UK
2. Department of Public Health and Primary Care, Cambridge University, UK
3. Institute of Ageing, Newcastle University, UK

**\*Corresponding Author:**

**Blossom Christa Maree Stephan**

Institute of Health and Society

Newcastle University

The Baddiley-Clark Building

Richardson Road

Newcastle upon Tyne

NE2 4AX

United Kingdom

Ph + 44 (0)191 222 3811

### Article Type Systematic Review

**Word Count** 3,245 (Excluding the Abstract and References)

**Summary** 98

**References** 72

**Figures** 2

**Supplementary Material** 2 Tables

**Keywords** Mild Cognitive Impairment (MCI), Randomised Controlled Trials, Operationalisation, Systematic Review



**ABSTRACT**

**Objective** To describe how criteria for amnesic Mild Cognitive Impairment (aMCI) have been operationalised in randomised controlled clinical trials (RCTs).

**Design** Systematic review.

**Information Sources** EMBASE, PubMed and PSYCHInfo were searched from their inception to February 2012. Electronic clinical trial registries were also searched (February 2012).

**Study Selection** RCTs were included where participant selection was made using Petersen et al (1999) defined aMCI. There was no restriction on intervention type or the outcome tested.

**Data Extraction** For each trial we extracted information on study design, demographics, exclusion criteria and the operationalisation strategy for the five aMCI diagnostic criterion including: (1) memory complain, (2) normal general cognitive function, (3) memory impairment, (4) no functional impairment and (5) no dementia.

**Results** 223 articles and 278 registered trials were reviewed of which 22 met inclusion criteria. Various methods were applied for operationalising aMCI criteria resulting in variability in participant selection. Memory complaint and assessment of general cognitive function were the most consistently measured criteria. There was large heterogeneity in the neuropsychological methods used to determine memory impairment. It was not possible to assess the impact of these differences on case selection accuracy for dementia prediction. Further limitations include selective and unclear reporting of how each of the criteria was measured.

1  
2  
3  
4 **Conclusion** The results highlight the urgent need for a standardised approach to  
5 mapping aMCI. Lack of uniformity in clinical diagnosis however is not exclusively a  
6  
7 problem for MCI but also for other clinical states such as dementia including  
8  
9 Alzheimer's disease, **Lewy Body, frontotemporal or** vascular dementia. Defining a  
10  
11 uniform approach to MCI classification, or indeed for any classification concept  
12  
13 within the field of dementia, should be a priority if further trials are to be  
14  
15 undertaken in the older aged population based on these concepts.  
16  
17  
18  
19  
20  
21  
22  
23  
24  
25  
26  
27  
28  
29  
30  
31  
32  
33  
34  
35  
36  
37  
38  
39  
40  
41  
42  
43  
44  
45  
46  
47  
48  
49  
50  
51  
52  
53  
54  
55  
56  
57  
58  
59  
60

## ARTICLE SUMMARY

### Article focus

- Accurate identification of individuals **at risk of dementia** or with **pre-dementia** is important for clinical trial enrolment.
- Diagnosis of **pre-dementia** is usually made using the amnesic form of Mild Cognitive Impairment (aMCI). While specific criteria for implementation exist there is no operationalisation protocol.
- Research Question: How have criteria for aMCI been operationalised in randomised controlled clinical trials?

### Key messages

- Various methods have been applied for operationalising aMCI criteria in randomised controlled clinical trials resulting in variability in participant selection.
- The results highlight the urgent need for a standardised approach to mapping aMCI.
- Lack of specific methods for clinical diagnosis is not a problem unique to the field of MCI. Across studies there continues to be inconsistency in the instruments and methodology used to diagnose Alzheimer's disease and Vascular Dementia, including its prodromal stage, Vascular Cognitive Impairment no Dementia (VCIND). Revision of diagnostic criteria should be a research priority.

**Strengths and limitations**

- The review focuses on **pre-dementia** defined using aMCI. However, not all clinical trials on **pre-dementia** cognitive states have used this definition of MCI.
- We chose to focus on aMCI as this is one of the commonly applied definitions in clinical and research practice.

## INTRODUCTION

As new preventative strategies for dementia are developed, methods to select persons accurately for clinical trial involvement will be needed. In this perspective, Mild Cognitive Impairment (MCI), an intermediate state between normal ageing and dementia has become a focus for trials to prevent or delay progression to Alzheimer's Disease. The expectation is that positive results are more likely to be achieved with earlier treatment initiation<sup>1,2</sup>. While several different definitions exist for MCI, Petersen et al<sup>3,4</sup> defined amnesic Mild Cognitive Impairment (aMCI) is often used in clinical and research practice. However, despite being commonly applied, no standardised method for the operationalisation of each of the five component criteria (Figure 1) necessary for an aMCI diagnosis exists, resulting in heterogeneity in diagnostic methods and case ascertainment across studies. Indeed, there are numerous possibilities for the measurement of the five criteria as highlight in Figure 1. The lack of an established diagnostic methodology for identifying cases for clinical trial enrolment is problematic as study specific participant selection raises questions regarding the nature of the sample selected, whilst also making cross study comparison and generalizability of findings difficult.

We undertook a systematic review to explore the methods used to classify aMCI cases, defined using Petersen et al<sup>3</sup> criteria, in randomised controlled clinical trials (RCTs). The focus was on inclusion criteria and variation in the operationalisation of each of the five aMCI component criteria as outlined in Figure 1.

## METHODS

This review has been undertaken with adherence to the PRISMA statement<sup>5</sup>. The review protocol is available on request.

### Search Strategy

EMBASE (including Medline) and PSYCHInfo were searched using the following keywords and using Medical Subject Heading (MeSH) terms: ("mild cognitive impairment" OR MCI) AND ("randomised controlled trial" OR "randomized controlled trial" OR RCT). Articles were searched from inception to 6 June 2011, with the search updated on 21 February 2012. Web based searches, using the term 'mild cognitive impairment' were also undertaken in the ISRCTR trial registry (<http://www.controlled-trials.com>) and on [www.clinicaltrials.gov](http://www.clinicaltrials.gov) (17 February 2012). Only studies that were published in English were included. Two investigators (BS and TM) independently searched publications using the following inclusion criteria: (1) the study was a RCT; (2) the trial had been completed (was not on-going or terminated) and results published; (3) the authors report selecting participants using the definition of aMCI as reported in Petersen et al (1999), and could include single or multi-domain amnesic MCI subtypes (amendments to criteria were allowed as long as stated and Petersen et al (1999) was referenced); and, (4) the MCI group was analysed separately to the dementia or control groups. The protocol paper or the first publication reporting the primary outcome was selected in case of multiple publications using the same study sample. Titles and abstracts were searched first, followed by the full text of any identified articles. Reviews were also retained and

1  
2  
3  
4 the reference lists of these and each included paper were interrogated.

5  
6 Disagreements were resolved by consensus. Data quality was not assessed as all  
7  
8 included studies were RCTs.  
9  
10

### 11 12 13 14 **Data Extraction**

15  
16 Data on the lead author, date of publication, study design (country, site, sampling  
17  
18 framework, duration, intervention), demographics (age and gender distributions),  
19  
20 trial exclusion criteria, dementia progression rates, outcomes tested and the  
21  
22 methods used to operationalised each of the five component criterion for the  
23  
24 diagnosis of aMCI were abstracted by two investigators (EP and TM) and checked by  
25  
26 a third (MS).  
27  
28  
29  
30  
31

### 32 33 **RESULTS**

34  
35 A total of 223 articles were identified from the literature search. From the electronic  
36  
37 search 11 trials were identified from the ISRCTR trial registry and 267 from  
38  
39 [www.clinicaltrials.gov](http://www.clinicaltrials.gov). Based on the title-abstract search 84 articles were identified  
40  
41 for full text review. In total, 22 articles met inclusion criteria and were retained for  
42  
43 this review. Figure 2 shows the selection process using the PRISMA (2009) Flow  
44  
45 Diagram. As shown in Figure 2, articles were mainly excluded as the sample did not  
46  
47 appear to be defined using the Petersen et al 1999 criteria or had inadequate details  
48  
49 to support the use of Petersen et al 1999 criteria (e.g., only stated an objective  
50  
51 cognitive deficit), or the article was a review. Supplementary Table 1a summarises  
52  
53 the general characteristics, demographics and outcomes tested in each included  
54  
55  
56  
57  
58  
59  
60

1  
2  
3  
4 article. Supplementary Table 1b summarises the operationalisation protocol used for  
5  
6 identifying aMCI cases in each trial.  
7  
8

9  
10  
11 Trial exclusion criteria varied, but mainly related to cerebrovascular and  
12  
13 cardiovascular disease or health and psychiatric related conditions that could be  
14  
15 associated with cognitive decline. There were also differences in the population  
16  
17 sampled (clinic vs. community), site (single vs. multi-centre), duration (e.g., 90 days  
18  
19 to 4 years), and sample demographics (e.g., age range: 50-90 years). Interventions  
20  
21 included pharmacological agents and supplementation<sup>6-17</sup> (including: donepezil,  
22  
23 galantamine, rofecoxib, fluoxetine, lithium treatment, estrogen treatment [E<sub>2</sub>],  
24  
25 vitamin supplementation (E and B), and supplementation with omega-3 poly  
26  
27 unsaturated fatty acids, arachidonic and docosahexaenoic acids), insulin therapy<sup>18</sup>,  
28  
29 physical activity<sup>19, 20</sup> (e.g., aerobic exercise), cognitive training/rehabilitation  
30  
31 programmes<sup>21-25</sup> (e.g., memory training, strategy learning) and combined therapies  
32  
33 including cholinesterase inhibitor (ChEI) use combined with a cognitive training  
34  
35 program<sup>26</sup>, and physical activity combined with vitamin B supplementation<sup>27</sup>.  
36  
37

38  
39 Outcomes varied extensively across studies and included assessment of cognitive  
40  
41 function (in all studies either as a primary or secondary outcome, with no  
42  
43 neuropsychological assessment applied consistently) in addition to non-cognitive  
44  
45 measures (e.g., vascular health such as blood pressure, quality of life, depression,  
46  
47 cerebrospinal fluid (CSF) biomarkers of Alzheimer's Disease pathology and  
48  
49 neuroimaging). Only five studies reported dementia progression rates all of which  
50  
51  
52  
53  
54  
55  
56  
57  
58  
59  
60



1  
2  
3  
4 varied: 16%/year<sup>9</sup>, 5-6%/year<sup>11</sup>, 24% over one year<sup>16</sup>, 11.9% over a 24-weeks trial<sup>17</sup>  
5  
6  
7 and 15% over four years<sup>12</sup>. Most results were negative.  
8  
9

### 10 11 **Operationalizing MCI Component Criterion**

12  
13  
14 Two studies<sup>16, 19</sup> did not report details of the operationalization protocol for defining  
15  
16 MCI.  
17

#### 18 19 **Criterion 1: Memory Complaint**

20  
21  
22 Five studies<sup>7, 8, 16, 18, 19</sup> reported no details on how memory complaint was obtained.  
23  
24 The memory complaint was obtained from the subject in four<sup>15, 21, 22, 27</sup> studies while  
25  
26 eleven studies<sup>6, 9-11, 13, 14, 17, 20, 23, 24, 26</sup> utilised subject report and informant  
27  
28 corroboration. One study<sup>25</sup> gave unclear details on who reported the complaint. In  
29  
30 one study<sup>12</sup> this criterion was operationalised using a history of gradual onset and  
31  
32 slow progressive decline in cognitive function, but how this was reported, for  
33  
34 example from the subject or informant was not stated. Three studies<sup>10, 22, 27</sup> used  
35  
36 specific scales rather than a single question to assess memory complaint. Smith et  
37  
38 al<sup>10</sup> used four items from the Cambridge Examination for Mental Disorders  
39  
40 (CAMDEX)<sup>28</sup>. Rapp et al<sup>22</sup> used the Memory Functioning Questionnaire (MFQ)<sup>29</sup>  
41  
42 which is a 64-item questionnaire assessing memory problems and use of mnemonics.  
43  
44 Van Uffelen et al<sup>27</sup> used a positive response to a single item “do you have memory  
45  
46 complaints?” or answering “sometimes” at least twice on the cognition scale of  
47  
48 Strawbridge<sup>30</sup>.  
49  
50  
51  
52  
53  
54  
55  
56  
57  
58  
59  
60

**Criterion 2: General Cognitive Function**

This criterion was the most consistently measured and was typically operationalised using the Mini Mental State Examination (MMSE)<sup>31</sup> score either alone<sup>6-8, 10, 11, 22</sup> or in combination with other measures including: a structured interview with the patient and informant<sup>24</sup>, the Dementia Rating Scale-II<sup>32</sup> (DRS-II)<sup>23</sup>, the Mattis Dementia Rating Scale (DRS)<sup>33</sup> (total score)<sup>14</sup>, the Telephone Interview for Cognitive Status<sup>34</sup> (TICS)<sup>27</sup>, the Clinic Dementia Rating<sup>35</sup> (CDR) score<sup>9, 26</sup> or the Alzheimer's Disease Assessment Scale-Cognitive Subscale<sup>36</sup> (ADAS-Cog) in addition with the Clinician Interview-Based Impression of Change<sup>37</sup> (CIBIC)<sup>17</sup>. One study used only the CDR score of 0.5<sup>12</sup>.

The cut-off chosen for the MMSE varied from 23 to 26. Most studies used a cut-off value of  $\geq 24$ <sup>6, 9-11, 22, 26, 27</sup>, but  $\geq 26$ <sup>7</sup>,  $\geq 23$ <sup>25</sup>, or a score adjusted for age/education<sup>8, 23</sup>, were also used. In one study<sup>6</sup>, the protocol was modified during recruitment and the cut-off was adjusted from 24-30 to 24-28. One study<sup>20</sup> used a 12-Item shortened MMSE with a cut-off score of  $\geq 7$ . Three studies<sup>14, 17, 24</sup> specified the use of the MMSE but did not report a cut-off score. Six studies did not specify operationalisation of this criterion<sup>13, 15, 16, 18, 19, 21</sup>.

**Criterion 3: Object Memory Decline**

Five studies did not specify operationalisation of this criterion<sup>7, 8, 16, 19, 26</sup>. Numerous different tests were used to assess cognition as shown in Supplementary Table 2. In addition to inconsistency in test selection there was no consistency in impairment

1  
2  
3  
4 severity (e.g., 1 standard deviation (SD), 1.5SDs or 2SDs below the mean). Further, it  
5  
6 was not always stated whether cut-off scores for impairment were adjusted for age,  
7  
8 education or pre-morbid ability. In one study<sup>11</sup>, severity was adjusted from 1.5SDs  
9  
10 below the mean (used in the first 6 months) to 1SD below the mean during the  
11  
12 course of screening. Based on the nature of the objective deficit, three studies<sup>14, 21, 24</sup>  
13  
14 reported inclusion of single amnesic or multi-domain amnesic MCI. One study<sup>10</sup>  
15  
16 reported the use of combined amnesic and non-amnesic (single and multi-domain)  
17  
18 cases.  
19  
20  
21  
22  
23  
24

25  
26 In terms of non-memory performance one study<sup>22</sup> reported that this was tested and  
27  
28 required to be unimpaired (defined using a cut-off >10<sup>th</sup> percentile). Another<sup>13</sup>  
29  
30 reported that performance was required to be relatively normal in non-memory  
31  
32 domains. In one study<sup>15</sup> division of cases was unclear; the objective deficit in this  
33  
34 study was defined as impairment on a total score comprising five domains  
35  
36 (immediate & delayed memory, visuospatial/construction, language & attention)  
37  
38 assessed using the Repeatable Battery for the Assessment of Neuropsychological  
39  
40 Status (RBANS)<sup>38</sup>.  
41  
42  
43  
44  
45  
46

#### 47 **Criterion 4: ADL/IADL**

48  
49 Seven studies did not specify operationalisation of this criterion<sup>6, 8, 13, 16, 19</sup>. In twelve  
50  
51 studies<sup>7, 9, 11, 12, 15, 17, 18, 21, 23-27</sup>, minimal or non-significant functional impairment was  
52  
53 allowed. One study required that in MCI cases that had a MMSE score between 23  
54  
55 and 25, cognitive impairments did not significantly interfere with daily activities or  
56  
57  
58  
59  
60

1  
2  
3  
4 social functioning, determined by a caregiver report<sup>25</sup>. This restriction was not  
5  
6 required in MCI cases with a MMSE score  $\geq 26$ .  
7  
8

9  
10  
11 Functional impairment tended to be assessed by self or informant report of difficulty  
12  
13 with ADLs or Basic ADLs. Specific scales were used for functional assessment in some  
14  
15 studies<sup>10, 11, 21, 26, 27</sup> including: the Functional Autonomy Measurement System<sup>39</sup>  
16  
17 (SMAFQ), the Blessed Dementia Rating Scale-CERAD<sup>40</sup> version, the Groningen Activity  
18  
19 Restriction Scale<sup>41</sup> (GARS) and selected items from the Lawton<sup>42</sup> and Katz<sup>43</sup> scales or  
20  
21 items from the Cambridge Behavioural Inventory<sup>44</sup> (CBI). In only two studies did it  
22  
23 appear that no evidence of any functional impairment was allowed; one<sup>10</sup> based on 5  
24  
25 items related to ADLs from the CBI and another<sup>20</sup> specified no decline in ADLs  
26  
27 without their measurement being specified.  
28  
29  
30  
31  
32  
33  
34

### 35 **Criterion 5: Dementia Diagnosis**

36  
37 Three studies did not specify operationalization of this criterion<sup>7, 14, 19</sup>. Fourteen<sup>6, 8-11,</sup>  
38  
39 <sup>13, 15, 17, 18, 20, 21, 24-26</sup> studies used the Diagnostic and Statistical Manual (DSM-III-R/IV-  
40  
41 TR/-IV)<sup>45, 46</sup>, National Institute of Neurological and Communicative Disorders and  
42  
43 Stroke and the Alzheimer's Disease and Related Disorders Association (NINCDS-  
44  
45 ADRDA)<sup>47</sup> criteria or National Institute of Neurological Disorders and Stroke and  
46  
47 Association Internationale pour la Recherche et l'Enseignement en Neurosciences  
48  
49 (NINCDS-AIREN)<sup>48</sup> criteria. Two studies used the CDR score<sup>12, 16</sup> and one each used a  
50  
51 self-report of a diagnosis<sup>22</sup>, clinical judgement<sup>23</sup> or the TICS combined with a MMSE  
52  
53 score  $< 24$ <sup>27</sup>.  
54  
55  
56  
57  
58  
59  
60

### **Additional Measures**

In some studies, additional measures, generally related to the assessment of global functioning (such as the CDR sum of boxes score) or dementia severity (e.g., from none, mild, moderate and severe) were made in parallel to the mapping of the five aMCI criteria. For example, two studies<sup>19, 21</sup> administered the Dementia Rating Scale (DRS), seven<sup>6, 8-12, 26</sup> the CDR, one<sup>11</sup> the Blessed Dementia Rating Scale<sup>40</sup> (BDRS), one<sup>17</sup> the CIBIC, and one<sup>25</sup> the Global Deterioration Scale<sup>49</sup> (GDS). One study<sup>10, 50</sup> also had informants complete both the Informant Questionnaire on Cognitive Decline in the Elderly<sup>51</sup> (IQCODE-Short form) and EuroQol<sup>52</sup> (EQ-5D), a measure of health status.

### **DISCUSSION**

This review highlights the lack of consistency in MCI case ascertainment in currently completed RCTs. How MCI was diagnosed was not always reported or clear and varying operationalisation protocols make it impossible to determine similarity across the samples recruited in the different trials. **A priority for clinical trial research is to agree a uniform set of criteria to operationalise MCI. The recruitment protocols identified in this review could provide the basis for future work to determine best practice (e.g., in terms of testing classification accuracy of the different methods used), in order to inform the development of a consistent recruitment methodology for MCI clinical trials.**

1  
2  
3  
4 The review highlights the continuing challenge of operationalising the current  
5  
6 Petersen et al (1999) definition of aMCI. Without a standard operationalisation  
7  
8 protocol for defining aMCI clinical trial recruitment will continue to be variable.  
9  
10  
11 Indeed, within the field of dementia there is a lack of consistency in  
12  
13 operationalisation protocols not only for aMCI, but its associated disorders (e.g.,  
14  
15 Cognitive Impairment no Dementia<sup>53</sup>), dementia and its sub-types (such as  
16  
17 Alzheimer's Disease, **Lewy Body dementia, frontotemporal dementia** and vascular  
18  
19 dementia), pre-MCI<sup>54</sup> and other **pre-dementia** states such as VCIND<sup>55</sup>. For some  
20  
21 dementias and their related conditions **it may however be difficult and unrealistic to**  
22  
23 **have one set of operational criteria, precise assessment instruments or cut-off**  
24  
25 **values. For example, a single set of criteria may not be possible for defining symptom**  
26  
27 **fluctuations (e.g., as seen in Lewy Body dementia), capturing variability in symptom**  
28  
29 **profiles (e.g., the different type of aphasic deficit presented in frontotemporal**  
30  
31 **dementia) or reflecting differences in neuropathological profiles (e.g., for vascular**  
32  
33 **dementia and VCIND the type and location of vascular damage may result in variable**  
34  
35 **symptom profiles). Different diagnostic criteria for MCI affect prevalence<sup>56</sup> and**  
36  
37 **progression<sup>57</sup>. Similarly for dementia different criteria have been found to affect**  
38  
39 **prevalence<sup>58, 59</sup>. Inconsistency in case classification for any health condition,**  
40  
41 **whether it is within the field of dementia or any other disease category, can have**  
42  
43 **impactions for research and trial recruitment and outcomes.**  
44  
45  
46  
47  
48  
49  
50

51  
52  
53  
54 With regard to aMCI, consensus needs to be reached on five core issues relating to  
55  
56 the measurement of each of the component criteria. First, whether memory  
57  
58  
59  
60

1  
2  
3  
4 complaint should be self and/or information reported and how it should be assessed  
5  
6 (e.g., single or multiple items). Second, how global cognitive function should be  
7  
8 assessed with possible measures including the MMSE, CDR and Global Deterioration  
9  
10 Scale, and what the best cut-off score is (within and across cultures). Third, which  
11  
12 neuropsychological test(s) should be used to assess memory<sup>60</sup>, what should be the  
13  
14 severity of cognitive impairment (1SD, 1.5SD) and whether covariate adjustment is  
15  
16 needed. In addition, is the question of whether both memory and non-memory  
17  
18 domains should be tested. Possible tests identified in this review are outlined in  
19  
20 Supplementary Table 2. Fourth, how functional performance should be assessed (the  
21  
22 type of questions), the nature of the task (e.g., instrumental ADLs, basic ADLs),  
23  
24 reporting (e.g., patient, informant or clinician) and what is the maximum level of  
25  
26 impairment (e.g., none, mild, moderate or severe difficulty or significant difficulty in  
27  
28 some areas but not in others). Fifth, how dementia should be defined for exclusion  
29  
30 with examples used including: the DSM or NINCDS-ADRDA criteria, the CDR sum of  
31  
32 boxes score  $\geq 1$  or via screening instruments (e.g., the Telephone Screening  
33  
34 Instrument). It should be noted that aMCI is not always operationalised as originally  
35  
36 specified (e.g., permissible significant functional impairment in some studies) and  
37  
38 consensus needs to be reached on whether all five criterion are necessary. Further,  
39  
40 whether modifications (if any) to criteria can be made and the implications of making  
41  
42 modifications, for example, in terms of dementia predictability and effect on  
43  
44 generalizability, needs to be established.  
45  
46  
47  
48  
49  
50  
51  
52  
53  
54  
55  
56  
57  
58  
59  
60

1  
2  
3  
4 Decision also needs to be reached on the best treatment target. The impairment  
5  
6 captured in aMCI is not always progressive, with a proportion of cases reverting to  
7  
8 normal or remaining stable at follow-up, particularly when mapped in population-  
9  
10 based studies<sup>57, 61</sup>. Indeed, symptoms of MCI are not always a consequence of  
11  
12 Alzheimer's pathology, but rather can have multiple aetiologies such as depression  
13  
14 or vascular disease each with different outcomes (e.g., dementia progression,  
15  
16 improvement with treatment for the underlying health symptoms)<sup>62, 63</sup>. Better  
17  
18 methods are needed to determine the underlying cause of disease in this patient  
19  
20 group to accurately identify those individuals whose MCI is associated with  
21  
22 Alzheimer's Disease. One possibility could be defining aMCI as in the Alzheimer's  
23  
24 Disease Cooperative Study trial<sup>9</sup> (based on a subjective memory complaint, MMSE  
25  
26 score, impaired performance on the Logical Memory II Subscale, no functional  
27  
28 impairment and a CDR score of 0.5) as **strict** implementation of this methodology  
29  
30 has been found to result in a consistent rate of dementia progression (approximately  
31  
32 16%/year) across studies, including the multicentre Alzheimer's Disease  
33  
34 Neuroimaging Initiative<sup>64</sup>. Further research is needed to test this method of  
35  
36 operationalisation across cohorts (clinical and population based; across countries)  
37  
38 and calculate prevalence and longitudinal course in order to determine  
39  
40 generalisability of these findings. **Such results could have important implications in**  
41  
42 **terms of identifying a standard protocol for all future aMCI clinical trials.**  
43  
44  
45  
46  
47  
48  
49  
50  
51  
52  
53

54 A recent task force on designing trials in early (pre-dementia) AD argues for the use  
55  
56 of aMCI criteria in combination with biomarkers to improve case selection for clinical  
57  
58  
59  
60



1  
2  
3  
4 trials<sup>2, 65</sup>. Suggestions for possible biomarkers have included hippocampal or whole  
5  
6 brain atrophy, CSF Aβ42 levels, PiB imaging, genetic screening (APOE e4 status) or  
7  
8 behavioural deficits<sup>66-68</sup>, as each has been associated with dementia. Further, how  
9  
10 dementia and AD are defined is currently undergoing revision, with the aim of  
11  
12 improved stratification of patients<sup>65, 69</sup>. Where MCI now sits in the ever changing  
13  
14 “lexicon” of AD (i.e., given there is currently no concrete border between preclinical  
15  
16 and clinical disease) will have implications for who is targeted for clinical trial  
17  
18 recruitment. For example, MCI as defined by Petersen et al criteria may no longer be  
19  
20 considered at-risk, but as already AD, and encompassed in the new term “prodromal  
21  
22 AD”; an early symptomatic stage pre-dementia where a patient shows evidence of  
23  
24 memory impairment and positive ratings on pathophysiological and topographical  
25  
26 markers of AD<sup>65</sup>. Clinical trial research may therefore shift some focus to  
27  
28 asymptomatic at-risk states (e.g., pre-MCI) where individuals are biomarker positive  
29  
30 for AD but are otherwise healthy. However, like aMCI efforts are needed to  
31  
32 standardise criteria and develop an operational protocol for any new stage of  
33  
34 disease (e.g., prodromal AD and pre-MCI) and undertake validation across settings  
35  
36 including oldest-old age groups and populations (vs. clinical samples).  
37  
38  
39  
40  
41  
42  
43  
44  
45  
46

47 The review should be viewed in light of some limitations. First, we choose to focus  
48  
49 on Petersen et al defined aMCI, as this is one of the commonly applied definitions in  
50  
51 clinical and research practice. However, not all trials on preclinical cognitive states  
52  
53 have used this definition of MCI with some studies defining intermediate cognitive  
54  
55 states using simply a MMSE score or using criteria that have made refinements to  
56  
57  
58  
59  
60

1  
2  
3  
4 the original aMCI criteria<sup>70, 71</sup>. The main change has been in the acceptable level of  
5  
6 functional impairment: from none to allowing minor problems, particularly in  
7  
8 complex activities such as for example, account keeping. Different definitions of MCI  
9  
10 have different prevalence estimates<sup>56</sup> and also vary in their risk of dementia  
11  
12 progression (e.g., more extensive patterns of cognitive changes have been  
13  
14 associated with greater progression of MCI to dementia)<sup>57</sup>. Subtypes have also been  
15  
16 defined depending on the neuropsychological profile including amnesic and non-  
17  
18 amnesic single or multi-domain MCI, and multi-domain combined MCI that includes  
19  
20 both memory and non-memory deficits. Which, if any, of the many different  
21  
22 criteria<sup>72</sup> and sub-types should be adopted in RCTs or whether no distinction should  
23  
24 be made between MCI and AD during recruitment<sup>2</sup>, requires further discussion.  
25  
26  
27  
28  
29  
30  
31

### 32 **Conclusion**

33  
34  
35 Much work needs to be done on the characterisation of individuals at-risk of  
36  
37 dementia for clinical trial recruitment. Within this framework attention is being  
38  
39 focused on redefining the earliest stages of disease and generating new definitions  
40  
41 of what constitutes “prodromal/pre-dementia” and “at-risk”. Standardisation in  
42  
43 definition and development of an operational protocol will result in improvements in  
44  
45 diagnosis and clinical trial methodology.  
46  
47  
48  
49  
50  
51  
52  
53  
54  
55  
56  
57  
58  
59  
60

## References

- [1] Petersen RC. Mild cognitive impairment clinical trials. *Nat Rev Drug Discov*. 2003;**2**: 646-653.
- [2] Aisen PS, Andrieu S, Sampaio C, *et al*. Report of the task force on designing clinical trials in early (predementia) AD. *Neurology*. 2011;**76**: 280-286.
- [3] Petersen RC, Smith GE, Waring SC, *et al*. Mild Cognitive Impairment: Clinical Characterization and Outcome. *Arch Neurol*. 1999;**56**: 303-308.
- [4] Petersen RC, Doody R, Kurz A, *et al*. Current concepts in mild cognitive impairment. *Arch Neurol*. 2001;**58**: 1985-1992.
- [5] Moher D, Liberati A, Tetzlaff J, *et al*. Preferred Reporting Items for Systematic Reviews and Meta-Analyses: The PRISMA Statement. *PLoS Med*. 2009;**6**: e1000097.
- [6] Doody RS, Ferris SH, Salloway S, *et al*. Donepezil treatment of patients with MCI: A 48-week randomized, placebo-controlled trial. *Neurology*. 2009;**72**: 1555-1561.
- [7] Koontz J, Baskys A. Effects of galantamine on working memory and global functioning in patients with mild cognitive impairment: A double-blind placebo-controlled study. *American Journal of Alzheimer's Disease and other Dementias*. 2005;**20**: 295-302.
- [8] Mowla A, Mosavinasab M, Pani A. Does fluoxetine have any effect on the cognition of patients with mild cognitive impairment?: A double-blind, placebo-controlled, clinical trial. *Journal of Clinical Psychopharmacology*. 2007;**27**: 67-70.
- [9] Petersen RC, Thomas RG, Grundman M, *et al*. Vitamin E and donepezil for the treatment of mild cognitive impairment. *N Engl J Med*. 2005;**352**: 2379-2388.
- [10] Smith AD, Smith SM, de Jager CA, *et al*. Homocysteine-lowering by b vitamins slows the rate of accelerated brain atrophy in mild cognitive impairment: A randomized controlled trial. *PLoS ONE*. 2010;**5**: 1-10.
- [11] Thal LJ, Ferris SH, Kirby L, *et al*. A randomized, double-blind, study of rofecoxib in patients with mild cognitive impairment. *Neuropsychopharmacology*. 2005;**30**: 1204-1215.
- [12] Winblad B, Gauthier S, Scinto L, *et al*. Safety and efficacy of galantamine in subjects with mild cognitive impairment. *Neurology*. 2008;**70**: 2024-2035.
- [13] Chiu CC, Su KP, Cheng TC, *et al*. The effects of omega-3 fatty acids monotherapy in Alzheimer's disease and mild cognitive impairment: a preliminary randomized double-blind placebo-controlled study. *Prog Neuropsychopharmacol Biol Psychiatry*. 2008;**32**: 1538-1544.
- [14] Chen X, Magnotta VA, Duff K, *et al*. Donepezil effects on cerebral blood flow in older adults with mild cognitive deficits. *J Neuropsychiatry Clin Neurosci*. 2006;**18**: 178-185.
- [15] Kotani S, Sakaguchi E, Warashina S, *et al*. Dietary supplementation of arachidonic and docosahexaenoic acids improves cognitive dysfunction. *Neurosci Res*. 2006;**56**: 159-164.
- [16] Forlenza OV, Diniz BS, Radanovic M, *et al*. Disease-modifying properties of long-term lithium treatment for amnesic mild cognitive impairment: randomised controlled trial. *Br J Psychiatry*. 2011;**198**: 351-356.

- 1  
2  
3  
4 [17] Sherwin BB, Chertkow H, Schipper H, *et al.* A randomized controlled trial of  
5 estrogen treatment in men with mild cognitive impairment. *Neurobiol Aging*.  
6 2011;**32**: 1808-1817.
- 7 [18] Craft S, Baker LD, Montine TJ, *et al.* Intranasal insulin therapy for Alzheimer  
8 disease and amnesic mild cognitive impairment: a pilot clinical trial. *Arch Neurol*.  
9 2012;**69**: 29-38.
- 10 [19] Baker LD, Frank LL, Foster-Schubert K, *et al.* Effects of aerobic exercise on  
11 mild cognitive impairment: a controlled trial. *Arch Neurol*. 2010;**67**: 71-79.
- 12 [20] Scherder EJ, Van Paasschen J, Deijen JB, *et al.* Physical activity and executive  
13 functions in the elderly with mild cognitive impairment. *Aging Ment Health*. 2005;**9**:  
14 272-280.
- 15 [21] Jean L, Simard M, Wiederkehr S, *et al.* Efficacy of a cognitive training  
16 programme for mild cognitive impairment: Results of a randomised controlled study.  
17 *Neuropsychological Rehabilitation*. 2010;**20**: 377-405.
- 18 [22] Rapp S, Brenes G, Marsh AP. Memory enhancement training for older adults  
19 with mild cognitive impairment: A preliminary study. *Aging and Mental Health*.  
20 2002;**6**: 5-11.
- 21 [23] Troyer AK, Murphy KJ, Anderson ND, *et al.* Changing everyday memory  
22 behaviour in amnesic mild cognitive impairment: A randomised controlled trial.  
23 *Neuropsychological Rehabilitation*. 2008;**18**: 65-88.
- 24 [24] Kinsella GJ, Mullaly E, Rand E, *et al.* Early intervention for mild cognitive  
25 impairment: a randomised controlled trial. *Journal of Neurology, Neurosurgery &*  
26 *Psychiatry*. 2009;**80**: 730-736.
- 27 [25] Buschert VC, Friese U, Teipel SJ, *et al.* Effects of a newly developed cognitive  
28 intervention in amnesic mild cognitive impairment and mild Alzheimer's disease: a  
29 pilot study. *J Alzheimers Dis*. 2011;**25**: 679-694.
- 30 [26] Rozzini L, Costardi D, Chilovi V, *et al.* Efficacy of cognitive rehabilitation in  
31 patients with mild cognitive impairment treated with cholinesterase inhibitors.  
32 *International Journal of Geriatric Psychiatry*. 2007;**22**: 356-360.
- 33 [27] Van Uffelen JGZ, Hopman-Rock M, Chin A Paw MJM, *et al.* Protocol for  
34 Project FACT: A randomised controlled trial on the effect of a walking program and  
35 vitamin B supplementation on the rate of cognitive decline and psychosocial  
36 wellbeing in older adults with mild cognitive impairment [ISRCTN19227688]. *BMC*  
37 *Geriatrics*. 2005;**5**: doi:10.1186/1471-2318-1185-1118.
- 38 [28] Roth M, Tym E, Mountjoy CQ, *et al.* CAMDEX: The cambridge examination for  
39 mental disorders of the elderly. Cambridge: Cambridge University Press, 1988.
- 40 [29] Gilewski MJ, Zelinski EM. Memory Functioning Questionnaire (MFQ).  
41 *Psychopharmacology bulletin*. 1988;**24**: 665-670.
- 42 [30] Strawbridge WJ, Shema SJ, Balfour JL, *et al.* Antecedents of frailty over three  
43 decades in an older cohort. *The journals of gerontology Series B, Psychological*  
44 *sciences and social sciences*. 1998;**53**: S9-16.
- 45 [31] Folstein MF, Folstein SE, McHugh PR. "Mini-mental state". A practical method  
46 for grading the cognitive state of patients for the clinician. *J Psychiatr Res*. 1975;**12**:  
47 189-198.
- 48  
49  
50  
51  
52  
53  
54  
55  
56  
57  
58  
59  
60

- 1  
2  
3  
4  
5 [32] Jurica PJ, Leitten CL, Mattis S. *Dementia Rating Scale-2: Professional manual*.  
6 Lutz: Psychological Assessment Resources, 2001.
- 7 [33] Mattis S. *Dementia Rating Scale: Professional manual*. Odessa, FL:  
8 Psychological Assessment Resources, 1988.
- 9 [34] Brandt J, Spencer M, Folstein M. The telephone interview for cognitive status.  
10 *Neuropsychiatry, Neuropsychology and Behavioral Neurology* 1988;**1**: 111-117.
- 11 [35] Hughes CP, Berg L, Danziger WL, *et al*. A new clinical scale for the staging of  
12 dementia. *Br J Psychiatry*. 1982;**140**: 566-572.
- 13 [36] Rosen WG, Mohs RC, Davis KL. A new rating scale for Alzheimer's disease. *The*  
14 *American journal of psychiatry*. 1984;**141**: 1356-1364.
- 15 [37] Schneider LS, Olin JT, Doody RS, *et al*. Validity and reliability of the  
16 Alzheimer's Disease Cooperative Study-Clinical Global Impression of Change. The  
17 Alzheimer's Disease Cooperative Study. *Alzheimer disease and associated disorders*.  
18 1997;**11 Suppl 2**: S22-32.
- 19 [38] Randolph C, Tierney MC, Mohr E, *et al*. The Repeatable Battery for the  
20 Assessment of Neuropsychological Status (RBANS): preliminary clinical validity. *J Clin*  
21 *Exp Neuropsychol*. 1998;**20**: 310-319.
- 22 [39] Hebert R, Carrier R, Bilodeau A. The Functional Autonomy Measurement  
23 System (SMAF): description and validation of an instrument for the measurement of  
24 handicaps. *Age Ageing*. 1988;**17**: 293-302.
- 25 [40] Morris JC, Mohs RC, Rogers H, *et al*. Consortium to establish a registry for  
26 Alzheimer's disease (CERAD) clinical and neuropsychological assessment of  
27 Alzheimer's disease. *Psychopharmacology bulletin*. 1988;**24**: 641-652.
- 28 [41] Kempen GI, Miedema I, Ormel J, *et al*. The assessment of disability with the  
29 Groningen Activity Restriction Scale. Conceptual framework and psychometric  
30 properties. *Soc Sci Med*. 1996;**43**: 1601-1610.
- 31 [42] Lawton MP, Brody EM. Assessment of older people: self-maintaining and  
32 instrumental activities of daily living. *Gerontologist*. 1969;**9**: 179-186.
- 33 [43] Katz S, Downs TD, Cash HR, *et al*. Progress in development of the index of  
34 ADL. *Gerontologist*. 1970;**10**: 20-30.
- 35 [44] Wedderburn C, Wear H, Brown J, *et al*. The utility of the Cambridge  
36 Behavioural Inventory in neurodegenerative disease. *J Neurol Neurosurg Psychiatry*.  
37 2008;**79**: 500-503.
- 38 [45] American Psychiatric Association. *Diagnostic and Statistical Manual of Mental*  
39 *Disorders (Third Edition, revised) (DSM-III-R)*. Washington, DC: APA, 1987.
- 40 [46] American Psychiatric Association. *Diagnostic and Statistical Manual of Mental*  
41 *Disorders (Fourth Edition) (Text Revision: DMS-IV-TR)* Arlington, VA: American  
42 Psychiatric Publishing Inc, 2000.
- 43 [47] McKhann G, Drachman D, Folstein M, *et al*. Clinical diagnosis of Alzheimer's  
44 disease: report of the NINCDS-ADRDA Work Group under the auspices of  
45 Department of Health and Human Services Task Force on Alzheimer's Disease.  
46 *Neurology*. 1984;**34**: 939-944.
- 47 [48] Roman GC, Tatemichi TK, Erkinjuntti T, *et al*. Vascular dementia: diagnostic  
48 criteria for research studies. Report of the NINDS-AIREN International Workshop.  
49 *Neurology*. 1993;**43**: 250-260.
- 50  
51  
52  
53  
54  
55  
56  
57  
58  
59  
60

- 1  
2  
3  
4 [49] Reisberg B, Ferris SH, de Leon MJ, *et al.* The Global Deterioration Scale for  
5 assessment of primary degenerative dementia. *The American journal of psychiatry.*  
6 1982;**139**: 1136-1139.
- 7 [50] de Jager CA, Oulhaj A, Jacoby R, *et al.* Cognitive and clinical outcomes of  
8 homocysteine-lowering B-vitamin treatment in mild cognitive impairment: a  
9 randomized controlled trial. *International Journal of Geriatric Psychiatry.* 2012;**26**:  
10 592-600.
- 11 [51] Jorm AF. The Informant Questionnaire on cognitive decline in the elderly  
12 (IQCODE): a review. *Int Psychogeriatr.* 2004;**16**: 275-293.
- 13 [52] EuroQol Group. EuroQol-A new facility for the measurement of health-  
14 related quality of life. *Health Policy.* 1990;**16**: 199-208.
- 15 [53] Ebly EM, Hogan DB, Parhad IM. Cognitive impairment in the nondemented  
16 elderly. Results from the Canadian Study of Health and Aging. *Arch Neurol.* 1995;**52**:  
17 612-619.
- 18 [54] Duara R, Loewenstein DA, Greig MT, *et al.* Pre-MCI and MCI:  
19 neuropsychological, clinical, and imaging features and progression rates. *The*  
20 *American journal of geriatric psychiatry : official journal of the American Association*  
21 *for Geriatric Psychiatry.* 2011;**19**: 951-960.
- 22 [55] Stephan BC, Matthews FE, Khaw KT, *et al.* Beyond mild cognitive impairment:  
23 vascular cognitive impairment, no dementia (VCIND). *Alzheimer's research &*  
24 *therapy.* 2009;**1**: 4.
- 25 [56] Stephan BC, Matthews FE, McKeith IG, *et al.* Early cognitive change in the  
26 general population: how do different definitions work? *J Am Geriatr Soc.* 2007;**55**:  
27 1534-1540.
- 28 [57] Matthews FE, Stephan BC, McKeith IG, *et al.* Two-year progression from mild  
29 cognitive impairment to dementia: to what extent do different definitions agree? *J*  
30 *Am Geriatr Soc.* 2008;**56**: 1424-1433.
- 31 [58] Erkinjuntti T, Ostbye T, Steenhuis R, *et al.* The effect of different diagnostic  
32 criteria on the prevalence of dementia. *N Engl J Med.* 1997;**337**: 1667-1674.
- 33 [59] Wancata J, Borjesson-Hanson A, Ostling S, *et al.* Diagnostic criteria influence  
34 dementia prevalence. *The American journal of geriatric psychiatry : official journal of*  
35 *the American Association for Geriatric Psychiatry.* 2007;**15**: 1034-1045.
- 36 [60] Lonie JA, Tierney KM, Ebmeier KP. Screening for mild cognitive impairment: a  
37 systematic review. *Int J Geriatr Psychiatry.* 2009;**24**: 902-915.
- 38 [61] Mitchell AJ, Shiri-Feshki M. Rate of progression of mild cognitive impairment  
39 to dementia--meta-analysis of 41 robust inception cohort studies. *Acta psychiatrica*  
40 *Scandinavica.* 2009;**119**: 252-265.
- 41 [62] DeCarli C. Mild cognitive impairment: prevalence, prognosis, aetiology, and  
42 treatment. *The Lancet Neurology.* 2003;**2**: 15-21.
- 43 [63] Panza F, Capurso C, D'Introno A, *et al.* Heterogeneity of mild cognitive  
44 impairment and other predementia syndromes in progression to dementia.  
45 *Neurobiology of Aging.* 2007;**28**: 1631-1632.
- 46 [64] Petersen RC, Aisen PS, Beckett LA, *et al.* Alzheimer's Disease Neuroimaging  
47 Initiative (ADNI): clinical characterization. *Neurology.* 2010;**74**: 201-209.
- 48  
49  
50  
51  
52  
53  
54  
55  
56  
57  
58  
59  
60

- 1  
2  
3  
4 [65] Dubois B, Feldman HH, Jacova C, *et al.* Revising the definition of Alzheimer's  
5 disease: a new lexicon. *The Lancet Neurology*. 2010;**9**: 1118-1127.  
6 [66] Whitehair DC, Sherzai A, Emond J, *et al.* Influence of apolipoprotein e  
7 (epsilon)4 on rates of cognitive and functional decline in mild cognitive impairment.  
8 *Alzheimer's and Dementia*. 2010;**6**: 412-419.  
9 [67] Jack CR, Jr., Knopman DS, Jagust WJ, *et al.* Hypothetical model of dynamic  
10 biomarkers of the Alzheimer's pathological cascade. *Lancet Neurol*. 2010;**9**: 119-128.  
11 [68] Gauthier S, Reisberg B, Zaudig M, *et al.* Mild cognitive impairment. *Lancet*.  
12 2006;**367**: 1262-1270.  
13 [69] Sperling RA, Aisen PS, Beckett LA, *et al.* Toward defining the preclinical stages  
14 of Alzheimer's disease: recommendations from the National Institute on Aging-  
15 Alzheimer's Association workgroups on diagnostic guidelines for Alzheimer's disease.  
16 *Alzheimers Dement*. 2011;**7**: 280-292.  
17 [70] Winblad B, Palmer K, Kivipelto M, *et al.* Mild cognitive impairment--beyond  
18 controversies, towards a consensus: report of the International Working Group on  
19 Mild Cognitive Impairment. *J Intern Med*. 2004;**256**: 240-246.  
20 [71] Albert MS, DeKosky ST, Dickson D, *et al.* The diagnosis of mild cognitive  
21 impairment due to Alzheimer's disease: recommendations from the National  
22 Institute on Aging-Alzheimer's Association workgroups on diagnostic guidelines for  
23 Alzheimer's disease. *Alzheimers Dement*. 2011;**7**: 270-279.  
24 [72] Matthews FE, Stephan BC, Bond J, *et al.* Operationalization of mild cognitive  
25 impairment: a graphical approach. *PLoS Med*. 2007;**4**: 1615-1619.  
26  
27  
28  
29  
30  
31  
32  
33  
34  
35  
36  
37  
38  
39  
40  
41  
42  
43  
44  
45  
46  
47  
48  
49  
50  
51  
52  
53  
54  
55  
56  
57  
58  
59  
60

1  
2  
3  
4  
5  
6  
7  
8  
9  
10  
11  
12  
13  
14  
15  
16  
17  
18  
19  
20  
21  
22  
23  
24  
25  
26  
27  
28  
29  
30  
31  
32  
33  
34  
35  
36  
37  
38  
39  
40  
41  
42  
43  
44  
45  
46  
47  
48  
49  
50  
51  
52  
53  
54  
55  
56  
57  
58  
59  
60

**Additional Files Attached**

**Figure 1** Petersen criteria for amnesic MCI (aMCI)

**Figure 2** PRISMA (2009) flow diagram of article selection

**Supplementary Table 1a** Characteristics of included studies

**Supplementary Table 1b** Methods used to map aMCI in included studies

**Supplementary Table 2** Tasks used to assess the MCI criteria of “objective cognitive decline” (alphabetic order)

For peer review only



**Acknowledgements****Author Contributions**

ICMJE authorship met by all authors. BS and TM designed the review. BS, TM, EP and MS contributed to review article selection, data extraction and writing the results section. BS, TM and MS wrote the first draft of the paper. CB and IM made substantial contribution to the intellectual content. All authors contributed to the final version and approve its submission.

**Funding Statement**

This research received no specific grant from any funding agency in the public, commercial or not-for-profit sectors. The authors were personally salaried by their institutions during the period of writing (though no specific salary was set aside or given for the writing of this paper).

**Competing Interests**

No author has a conflict of interest to declare.

**Figure 1** Petersen criteria for amnesic MCI (aMCI)

|    |                                                                                                                                                                                             |
|----|---------------------------------------------------------------------------------------------------------------------------------------------------------------------------------------------|
| 1. | Subjective memory complaint (preferably corroborated by an informant)<br><b>Operationalisation Issues</b> Participant, informant, single question, questionnaire                            |
| 2. | Normal general cognitive function<br><b>Operationalisation Issues</b> Test selection, use of a cut-off score, adjustments for age, education or prior ability                               |
| 3. | Objective memory impairment<br><b>Operationalisation Issues</b> Test selection, use of a cut-off score, adjustments for age, education or prior ability                                     |
| 4. | Preserved activities of daily living (ADL)<br><b>Operationalisation Issues</b> Type of impairment such as instrumental or basic activities of living, degree of difficulty (if any) allowed |
| 5. | No dementia<br><b>Operationalisation Issues</b> Impact of diagnostic criteria on caseness                                                                                                   |

Petersen criteria for amnesic MCI (aMCI)  
102x66mm (300 x 300 DPI)



Figure 2. PRISMA (2009) flow diagram of article selection  
191x205mm (300 x 300 DPI)



Table 1a Characteristics of included studies

| Reference (First Author, Year) | Sample (Country)                                                     | Intervention                                                                                                                    | Number of Subjects Randomised                                                 | Age Range                                              | Gender (M:F)            | Mean Baseline MMSE (MCI cases)               | Single or Multi Domain Amnesic MCI | Outcomes Tested                                                                                                                                                                                                                                                                                                                                                                                                   |
|--------------------------------|----------------------------------------------------------------------|---------------------------------------------------------------------------------------------------------------------------------|-------------------------------------------------------------------------------|--------------------------------------------------------|-------------------------|----------------------------------------------|------------------------------------|-------------------------------------------------------------------------------------------------------------------------------------------------------------------------------------------------------------------------------------------------------------------------------------------------------------------------------------------------------------------------------------------------------------------|
| Baker 2010                     | Memory Clinic (USA)                                                  | Exercise vs. Stretching. Duration: 6 months                                                                                     | 19 MCI (Aerobic), 10 MCI (Stretching)                                         | 55-85                                                  | 15:14                   | 27.4                                         | Unknown                            | Cognitive: TMT A&B, Stroop, Task Switching, Verbal Fluency, SDMT, Story Recall, List learning, Delayed-Match-to-Sample; Non-Cognitive: Cardio respiratory fitness (VO <sub>2</sub> peak, treadmill grade, time to exhaustion), blood pressure, adiposity, hyperinsulinemic-euglycemic clamp, blood/plasma: insulin, IGF-I, cortisol levels, BDNF, platelet factor 4, Aβ <sub>40</sub> , Aβ <sub>42</sub> , lipids |
| Buschert 2011 & Forster 2011   | Dementia Research Section & University Based Memory Clinic (Germany) | Multicomponent cognitive intervention vs. Active control. NOTE: Intervention varied for the MCI & AD groups. Duration: 6 months | 24 aMCI (12 intervention, 12 control), 15 Mild AD (8 intervention, 7 control) | 50+                                                    | 19:20                   | 27.4 (1.6)                                   | Either                             | Cognitive: ADAS-Cog, MMSE, TMT A&B, RBANS Story Memory & Recall; Non-cognitive: MADRS, QoL-AD, FDG-PET                                                                                                                                                                                                                                                                                                            |
| Chen 2006                      | Community volunteers (USA)                                           | Donepezil (titrated to 10mg daily over 6 weeks & continued for 6 months) vs. Placebo. Duration: 6 months                        | 4 MCI (Treatment) vs. 7 MCI (Placebo)                                         | M=74.8 (SD=7.4) [Treatment]; M=68.4 (SD=4.0) [Placebo] | 4:7                     | 29.8 (0.5) [Treatment]; 29.6 (0.8) [Placebo] | Either                             | Cognitive: MMSE, HVLT-R; Non-cognitive: Global & regional cerebral blood flow (gCBF, rCBF) on PET during the verbal recall task                                                                                                                                                                                                                                                                                   |
| Chiu 2008                      | Newspaper recruited (1 site; Taiwan)                                 | Omega-3 PUFAs (3 capsules twice daily; 1080mg EPA+720mg DHA) vs. Placebo (Olive oil). Duration: 24 weeks                        | 10 AD/14 MCI (Omega-3); 13 AD/9 MCI (Placebo)                                 | 55-90                                                  | Unknown (for MCI cases) | Unknown                                      | Unknown                            | Cognitive: ADAS-Cog (Cognitive items only), MMSE; Non-cognitive: HDRS (At baseline & week 24 only), CIBIC-plus, erythrocyte membrane fatty acid compositions, fatty acids (e.g., total n3 PUFAs, DHA, EPA, plasma amino acid levels)                                                                                                                                                                              |

| Reference (First Author, Year) | Sample (Country)                                                  | Intervention                                                                                                                               | Number of Subjects Randomised                                                                                                | Age Range                                                  | Gender (M:F) | Mean Baseline MMSE (MCI cases)                   | Single or Multi Domain Amnesic MCI  | Outcomes Tested                                                                                                                                                                                                                                              |
|--------------------------------|-------------------------------------------------------------------|--------------------------------------------------------------------------------------------------------------------------------------------|------------------------------------------------------------------------------------------------------------------------------|------------------------------------------------------------|--------------|--------------------------------------------------|-------------------------------------|--------------------------------------------------------------------------------------------------------------------------------------------------------------------------------------------------------------------------------------------------------------|
| Craft 2012                     | Clinical Research Unit of a Veterans Affairs medical center (USA) | Intranasal insulin (10 or 20 IU twice/day for a total dose of 20 or 40 IU/day) vs. Placebo (Saline twice a day). Duration: 4 months        | 64 MCI [n=21 Placebo, n=20 20-IU, n=23 40-IU] vs. 40 Probable AD (CDR=0.5-1 & MMSE>15) [n=9 Placebo, n=16 20-IU, n=15 40-IU] | 55+                                                        | 59:45        | Unknown                                          | Unknown                             | Cognitive: Story Recall-Delayed, DSRS, ADAS-Cog; Non-cognitive: ADCS-ADL, Plasma biological markers, glucose metabolism, CSF (AB42, AB40, tau protein to AB42 ratio, P181-tau) & FDG-PET cerebral metabolic rate of glucose (CMRG1c) utilisation (Subsample) |
| Doody 2009                     | Multicentre (USA)                                                 | Donepezil (5 mg/day for 6 weeks followed by 10 mg/day) vs. Placebo. Duration: 48 weeks                                                     | 409 MCI (Treatment), 412 MCI (Placebo)                                                                                       | 45-90                                                      | 424:354      | 27.5                                             | Unknown                             | Cognitive: Modified ADAS-Cog, CDR-SB, SDMT, MMSE, Digit Span Backwards; Non-Cognitive: NPI, PDQ [Self and respondent versions], The AD Cooperative Study CGIC-MCI, PGA                                                                                       |
| Forlenza 2011                  | Community Dwelling Out-patients (1 site; Brazil)                  | Low dose lithium (150mg titrated to target serum levels of 0.25-0.5 mmol/l) vs. Placebo. Duration: 1 year                                  | 24 MCI (Lithium) vs. 21 MCI (Placebo)                                                                                        | 60+                                                        | Unknown      | Unknown                                          | Unknown                             | Cognitive: CDR, ADAS-Cog, CERAD Delayed Recall Test, Sequence of Letters & Numbers, TMT A&B; Non-cognitive: CSF concentrations (AB42, total tau, P-tau)                                                                                                      |
| Jean 2010                      | Unknown (Canada)                                                  | Errorless learning + spatial retrieval vs. Errorful learning. All groups given information about memory (n=6 sessions). Duration: 10 weeks | 11 MCI (Training), 11 MCI (Controls)                                                                                         | 50+                                                        | 9:13         | 29.5                                             | Either (12 single; 10 multi-domain) | Cognitive: Face-Name Associations (Training Measure), DRS-2, MMSE, MMQ, RBMT, CVLT-II; Non-cognitive: Anxiety & fatigue, Self-Esteem Scale, NPI, SMAP                                                                                                        |
| Kinsella 2009                  | Memory Clinic (2 sites; Australia)                                | Memory intervention vs. Waitlist control. Duration: 5 weeks                                                                                | 22 (Intervention), 22 (Waitlist)                                                                                             | M=78.9 (SD=5.7) (Intervention); M=74.7 (SD=6.1) (Waitlist) | 19:25        | 25.9 (2.8) [Intervention]; 26.8 (1.8) [Waitlist] | Either                              | Cognitive: RMBT (Reminding Task-Modified), Envelope Task; Non-cognitive: MMQ [Ability Scale, Strategy & Contentment sub-scales], Strategy Knowledge Repertoire                                                                                               |
| Koontz 2005                    | Outpatients (1 site; USA)                                         | Galantamine (Dose escalation: 8, 15, 24 mg/d) vs. Placebo. Duration: 16 weeks                                                              | 8 MCI (Treatment), 11 MCI (Control)                                                                                          | 51-87                                                      | 19:0         | Unknown                                          | Unknown                             | Cognitive: CANTAB (DMS, PAL, PRM, SRM, IED, SOC), CVLT; Non-cognitive: FAQ                                                                                                                                                                                   |

| Reference (First Author, Year) | Sample (Country)                              | Intervention                                                                                                                      | Number of Subjects Randomised                                                 | Age Range                                                               | Gender (M:F)  | Mean Baseline MMSE (MCI cases) | Single or Multi Domain Amnesic MCI | Outcomes Tested                                                                                                                                                                                                                                           |
|--------------------------------|-----------------------------------------------|-----------------------------------------------------------------------------------------------------------------------------------|-------------------------------------------------------------------------------|-------------------------------------------------------------------------|---------------|--------------------------------|------------------------------------|-----------------------------------------------------------------------------------------------------------------------------------------------------------------------------------------------------------------------------------------------------------|
| Kotani 2006                    | Out patients Minami-gaoka Hospital (Japan)    | PUFA [ARA & DHA: 240mg/day of each: 6 capsules/day] vs. Placebo (Olive oil: MCI Placebo group only). Duration: 90 days            | 12 (MCI Treatment), 9 (MCI Placebo), 10 (Organic brain lesions), 8 (Early AD) | M=68.1 (SD=6.3) [MCI]; M=57.5 (SD=12.4) [Organic]; M=67.0 (SD=6.3) [AD] | 19:20         | Unknown                        | Either                             | Cognitive: RBANS [Form A baseline & Forms A or B randomly used at follow-up]; Non-cognitive: Serum chemistry                                                                                                                                              |
| Mowla 2007                     | Referrals for memory problems (Iran)          | Fluoxetine (10 mg/d baseline, increase by 20mg/d in 1-2 weeks) vs. Placebo. Duration: 8 weeks                                     | 33 MCI (Treatment), 25 MCI (Control)                                          | 55-75                                                                   | 56.8% (Women) | 23.9                           | Unknown                            | Cognitive: WMS-III Immediate & Delayed score, Digit Span (forward/backward), WMS-III Family Pictures, MMSE; Non-cognitive: HAM-D, CGI                                                                                                                     |
| Petersen 2005                  | AD Cooperative Sites (69 sites; USA & Canada) | Vitamin E (2000 IU) vs. Donepezil (5mg/d initially to 10mg after 6 weeks) vs. Placebo. Duration: 3 years                          | 253 (Donepezil), 257 (Vitamin E), 259 (Placebo)                               | 55-90                                                                   | 417:352       | 27.3                           | Unknown                            | Cognitive: Dementia diagnosis, MMSE, CDR, GDS, ADAS-Cog (11 & 13 item), New York University Paragraph Recall Test, SDMT, Category Fluency Test, Number Cancellation Test, BNT, Digits Backwards Test, CDT, Maze Tracing Task; Non-cognitive: ADCS-MCI ADL |
| Rapp 2002                      | Community dwelling (USA)                      | Cognitive & behavioural treatment (6 weekly group meetings) vs. Control (No memory education or training). Duration: 6 weeks      | 9 MCI (Treatment), 10 MCI (Control)                                           | M=75.1 (SD=7.0)                                                         | 8:11          | 27.6                           | Unknown                            | Cognitive: Word List Recall, Grocery List Task, Names & Faces Task, Wechsler Paragraph Recall Test (Immediate & Delayed); Non-cognitive: MFQ, Memory Controllability Inventory, Profile of Mood States                                                    |
| Rozzini 2007                   | Independent living (2 sites; Italy)           | ChEIs vs. ChEIs + TNP vs. Not treated. Duration: 3 blocks of sessions every 2 months (Consisting of 20 individual sessions/block) | 22 (ChEIs), 15 (ChEIs + TNP), 22 (Control)                                    | 63-78                                                                   | Unknown       | 26.4                           | Unknown                            | Cognitive: Short Story Recall, Category & Letter Fluency, Raven's Coloured Matrices, Rey's figure (Copy & Delayed), MMSE; Non-cognitive: NPI, GDS-15 Items                                                                                                |

| Reference (First Author, Year) | Sample (Country)                                                                                     | Intervention                                                                                                                   | Number of Subjects Randomised                                                                     | Age Range | Gender (M:F)                               | Mean Baseline MMSE (MCI cases)                                                                                                 | Single or Multi Domain Amnesic MCI                                 | Outcomes Tested                                                                                                                                                                                                                                                              |
|--------------------------------|------------------------------------------------------------------------------------------------------|--------------------------------------------------------------------------------------------------------------------------------|---------------------------------------------------------------------------------------------------|-----------|--------------------------------------------|--------------------------------------------------------------------------------------------------------------------------------|--------------------------------------------------------------------|------------------------------------------------------------------------------------------------------------------------------------------------------------------------------------------------------------------------------------------------------------------------------|
| Scherder 2005                  | Residents of a combined home for the elderly/nursing home (1 site; Netherlands)                      | Walking Group vs. Hand & Face Exercises vs. Control. Duration: 6 weeks (30 mins/day; 3 times/week)                             | 15 MCI (Walking), 13 MCI (Hand & Face Exercises), 15 MCI (Control)                                | M=86      | 5:38                                       | Used a 12-Item short MMSE version [Range 0-12]. M=9.7 (SD=1.9) [Walking]; M=9.2 (SD=1.3) [Hand/Face]; M=9.9 (SD=1.4) [Control] | Unknown                                                            | Cognitive: Category Naming (Animals, Occupations), TMT A&B, Digit Span (WMS-R), Visual Memory Span (WMS-R), Verbal Learning & Memory Test: List A (Direct Recall, Delayed Recall, Recognition), RBMT (Face & Picture Recognition); Non-cognitive: N/A                        |
| Sherwin 2011                   | Memory clinic                                                                                        | Estrogen (1mg/day micronised E <sub>2</sub> orally) vs. Placebo. Duration: 24 weeks (12 weeks treatment & 12 weeks cross-over) | 22 MCI (Treatment-placebo; GROUP A; 16 analysed) vs. 21 (Placebo-treatment; GROUP B; 12 analysed) | 55-95     | 43:0                                       | 27.0 (2.0) [GROUP A]; 27.8 (2.3) [GROUP B]                                                                                     | Unknown                                                            | Cognitive: Buschke Selective Reminding task, WMS-R: Logical Memory I & II, PAL, Visual Reproduction subtest, Block Design, Waterline Task, Mental Rotation Tasks, Digit Span (Forwards & Backwards), Digit Symbol, Similarities Subtest; Non-cognitive: NPI, hormone levels  |
| Smith 2010 & de Jager 2011     | Single centre (via local newspaper & radio seeking elderly people with memory concerns) (1 site; UK) | Supplementary B vitamins (folic acid 0.8mg/d, vitamin B12 0.5mg/d + vitamin B6 20mg/d) vs. Placebo. Duration: 2 years          | 113 (85 completed MRI protocol) (Treatment), 110 (83 completed MRI protocol) (Placebo)            | 70+       | 66:102                                     | 28.3                                                                                                                           | Amnesic or non-amnesic (single or multi-domain on either subtypes) | Cognitive: MMSE, HVL, CANTAB (PAL, CLOX), TMT A&B, CERAD Category Fluency (Fruits, Vegetables), SDMT, Map Search, TICS-M & clinical outcome measures including the CDR & IQ-CODE; Non-cognitive: MRI rate of atrophy, total level of homocystein, Geriatric Depression Scale |
| Thal 2005                      | Multicentre (46 sites; USA)                                                                          | Rofecoxib 25mg once daily vs. Placebo once daily. Duration: up to 4 years                                                      | 725 (Rofecoxib), 732 (Placebo)                                                                    | 65+       | 31% women (Placebo), 34% women (Rofecoxib) | 27.3                                                                                                                           | Unknown                                                            | Cognitive: AD based on CDR $\geq$ 1 on 2 visits 2 months apart, or clinical appraisal despite CDR=0.5, SRT-Summed, SRT-Delayed, ADAS-Cog, CDR-SB; Non-cognitive: BDRS                                                                                                        |

| Reference (First Author, Year) | Sample (Country)                                        | Intervention                                                                                                                                                                                                                                                                                                     | Number of Subjects Randomised                                                     | Age Range | Gender (M:F) | Mean Baseline MMSE (MCI cases) | Single or Multi Domain Amnesic MCI | Outcomes Tested                                                                                                                                                                                                                                                                                                                                                                                                                                                                                                                             |
|--------------------------------|---------------------------------------------------------|------------------------------------------------------------------------------------------------------------------------------------------------------------------------------------------------------------------------------------------------------------------------------------------------------------------|-----------------------------------------------------------------------------------|-----------|--------------|--------------------------------|------------------------------------|---------------------------------------------------------------------------------------------------------------------------------------------------------------------------------------------------------------------------------------------------------------------------------------------------------------------------------------------------------------------------------------------------------------------------------------------------------------------------------------------------------------------------------------------|
| Troyer 2008                    | Physician referrals & newspaper advertisements (Canada) | 10 2-hour sessions over 6 months. Sessions grouped into: 1) info regarding a lifestyle factor that can affect memory (e.g., nutrition), 2) focused memory intervention training, 3) review of information or intervention &/or 4) outcome testing. Participants given weekly home assignments. Duration: 2 years | 24 (Intervention), 24 (Control)                                                   | M=75.4    | 32:36        | 27.8                           | Unknown                            | Cognitive: Memory Toolbox Questionnaire, Self-reported strategy use during memory testing & at home, MMQ [Subscales: Strategy, Contentment, Ability], Impact Rating Scale, Lifestyle Importance Questionnaire & Study created memory tests including: Name, number & wordlist recall; Non-cognitive: Hospital Anxiety & Depression Scale                                                                                                                                                                                                    |
| Van Uffelen 2007, 2008 & 2009  | Community dwelling (Netherlands)                        | Pharmacological + Activity. Two conditions: 1) twice-weekly group based moderate intensity walking programme vs. a low-intensity placebo activity programme & 2) daily vitamin pill containing 5mg folic acid, 0.4mg vitamin B12, 50mg vitamin B6 vs. placebo pill. Duration: 1 year                             | 152 total including: 77 (Walking), 75 (Low intensity), 78 (Vitamin), 74 (Placebo) | 70-80     | 44% women    | Median=29 (all 4 groups)       | Unknown                            | Cognitive: MMSE, AVLT, Verbal Fluency Test (Letter), DSST, Abridged Stroop Color Word Test, IQ-CODE; Non-Cognitive: SF-12, D-QoL, Euro-QoL, Geriatric Depression Scale, accelerometer, cardiovascular endurance (Groningen Fitness test), BMI, BP, blood vitamin levels + plasma concentrations, LASA physical activity questionnaire. In a subsample: Heart rate & measurement of subjective intensity (Borg Scale) (measured at start & during exercise programs and after 6 & 12 months) & the Physical Activity Readiness Questionnaire |



| Reference (First Author, Year) | Sample (Country)                                                                                    | Intervention                                                                                                                               | Number of Subjects Randomised                                                  | Age Range | Gender (M:F) | Mean Baseline MMSE (MCI cases) | Single or Multi Domain Amnestic MCI | Outcomes Tested                                                                        |
|--------------------------------|-----------------------------------------------------------------------------------------------------|--------------------------------------------------------------------------------------------------------------------------------------------|--------------------------------------------------------------------------------|-----------|--------------|--------------------------------|-------------------------------------|----------------------------------------------------------------------------------------|
| Winblad 2008                   | Multicentre (177 centres). Two studies (one with the addition of MRI) (International: 16 countries) | Galantamine (4mg BID for 1 month then 8mg BID for 1 month (plus 12mg BID if well tolerated)) vs. Placebo. Duration: 24 months (Each study) | Study 1 (494 Galantamine, 496 Control); Study 2 (532 Galantamine, 526 Control) | 50+       | 916:1132     | Unknown                        | Unknown                             | Cognitive: CDR, ADAS-cog adapted for MCI, DSST; Non-cognitive: ADCS-ADL adapted to MCI |

**Table 1b** Methods used to map aMCI in included studies

| Reference (First Author, Year) | Role of Clinical Judgement                                                                                                                                 | CRD or other Global score                                                           | Memory Complaint                                              | Objective Deficit                                                                                                                             | Cut-off                                                                                    | Global Cognitive Function                                              | ADL                                                                                                 | Other                                              | Dementia Diagnostic Criteria                                                         |
|--------------------------------|------------------------------------------------------------------------------------------------------------------------------------------------------------|-------------------------------------------------------------------------------------|---------------------------------------------------------------|-----------------------------------------------------------------------------------------------------------------------------------------------|--------------------------------------------------------------------------------------------|------------------------------------------------------------------------|-----------------------------------------------------------------------------------------------------|----------------------------------------------------|--------------------------------------------------------------------------------------|
| Baker 2010                     | Unknown                                                                                                                                                    | DRS                                                                                 | Unknown                                                       | Unknown                                                                                                                                       | Unknown                                                                                    | Unknown                                                                | Unknown                                                                                             | N/A                                                | Unknown                                                                              |
| Buschert 2011 & Forster 2011   | Comprehensive clinical & neurological assessment to support diagnosis of MCI or mild AD                                                                    | For MCI GDS=3; for mild AD GDS=4                                                    | Memory complaint                                              | Impaired on at least one of three memory tests: CERAD Neuropsychological Battery Immediate-recall, Delayed-recall &/or Recognition            | 1.5SD (Age/education adjusted)                                                             | MMSE≥23                                                                | No impairment in daily activities or social functioning in MCI cases with MMSE scores between 23-25 | N/A                                                | DSM-IV/NINCDS-ADRDA criteria for AD                                                  |
| Chen 2006                      | Reviewed all available medical records, current medications & undertook patient examination (for health related inclusion)                                 | N/A                                                                                 | Self-perception of memory loss                                | Impaired on a least one of: Mattis Dementia Rating Scale: Memory subscale, Logical Memory (WMS-III) or Brief Visuospatial Memory Test-Revised | 1SD (Age adjusted based on pre-morbid function)                                            | MMSE & Mattis Dementia Rating Scale total score (within normal limits) | No self-reported difficulties with ADL                                                              | Barona IQ estimate, MMSE, HVLT-R                   | Unknown                                                                              |
| Chiu 2008                      | Completed medical, psychiatric & neuropsychological assessment                                                                                             | N/A                                                                                 | Self or informant                                             | Logical Memory Delayed Recall (WMS-III). Relatively normal performance in non-memory domains                                                  | 1.5SD (Age/education adjusted)                                                             | Unknown                                                                | No impairment (scale not specified)                                                                 | CT scan or HIS (used to exclude vascular dementia) | DSM-IV                                                                               |
| Craft 2012                     | Diagnosis of aMCI by expert consensus based on all available data: cognitive testing, medical history, physical examination, clinical laboratory screening | N/A                                                                                 | Unknown                                                       | Delayed story-recall score                                                                                                                    | 1.5SD (Age/education adjusted for pre-morbid ability [Shipley Vocabulary Test])            | Unknown                                                                | Unknown                                                                                             | Unknown                                            | NINCDS-ADRDA criteria for AD                                                         |
| Doody 2009                     | Unknown                                                                                                                                                    | CDR=0.5 (Memory Box 0.5 or 1; no more than two other Box scores rated as high as 1) | Change from previous functioning corroborated by an informant | CDR Memory Box Score 0.5 or 1, WMS Logical Memory II delayed paragraph recall score                                                           | Education adjusted paragraph recall score: ≤8 (16+ years), ≤4 (8-15 years), ≤2 (0-7 years) | MMSE 24-28 (24-30 before protocol amendment)                           | Unknown                                                                                             | Rosen modified HIS≤4, CT scan                      | Probable/Possible Vascular dementia (NINCDS/ADRDA, DSM-IV) or other form of dementia |

| Reference (First Author, Year) | Role of Clinical Judgement                                       | CRD or other Global score                     | Memory Complaint                                                | Objective Deficit                                                                                                                                                  | Cut-off                        | Global Cognitive Function                                                          | ADL                                                                                                            | Other                                  | Dementia Diagnostic Criteria                                                    |
|--------------------------------|------------------------------------------------------------------|-----------------------------------------------|-----------------------------------------------------------------|--------------------------------------------------------------------------------------------------------------------------------------------------------------------|--------------------------------|------------------------------------------------------------------------------------|----------------------------------------------------------------------------------------------------------------|----------------------------------------|---------------------------------------------------------------------------------|
| Forlenza 2011                  | Unknown                                                          | CDR (cut-off not specified)                   | Unknown                                                         | Unknown                                                                                                                                                            | Unknown                        | Unknown                                                                            | Unknown                                                                                                        | CAMCOG                                 | Unknown                                                                         |
| Jean 2010                      | Neuropsychologist judgement used to properly identify aMCI cases | DRS-2 Score $\geq 7$                          | Difficulty in recall of face-name associations in everyday life | CVLT-II (primarily used for diagnosis of aMCI), Animal Naming, TMT A&B, CDT                                                                                        | 1.5SD (on the CVLT-II)         | Unknown                                                                            | Absence or few problems (SMAF; IADL items score 0 to -8)                                                       | N/A                                    | Possible/probable AD (DSM-IV-TR or NINCDS/ADRDA), or any other form of dementia |
| Kinsella 2009                  | Unknown                                                          | N/A                                           | Complaint by patient &/or informant                             | HVLT-R, RAVLT, Wechsler Logical Prose Passages, Word List Learning or Verbal Paired Associates                                                                     | 1.5SD (Age/education adjusted) | Relatively normal on structured interview (with patient & informant) & on the MMSE | No impairment in personal ADL (clinical interview with the patient & family). IADL could be minimally impaired | WTAR                                   | NINCDS-ADRDA criteria for AD                                                    |
| Koontz 2005                    | Unknown                                                          | N/A                                           | Memory complaints                                               | Unknown                                                                                                                                                            | Age adjusted                   | MMSE $\geq 26$                                                                     | Normal or close to normal                                                                                      | N/A                                    | Unknown                                                                         |
| Kotani 2006                    | Unknown                                                          | N/A                                           | Complaint of amnesia                                            | Total score on 12 indexes (Form A RBANS; Japanese version]) derived from five domains: Immediate & delayed memory, visuospatial/construction, language, attention) | 1.5SD                          | Unknown                                                                            | Unknown                                                                                                        | N/A                                    | NINCDS-ADRDA & NINDS-AIREN                                                      |
| Mowla 2007                     | Unknown                                                          | CDR=0.5                                       | Unknown                                                         | Unknown                                                                                                                                                            | Unknown                        | MMSE (Age/education adjusted)                                                      | Unknown                                                                                                        | N/A                                    | DSM-IV                                                                          |
| Petersen 2005                  | Reviewed clinical & psychometric data to diagnose AD             | CDR=0.5 (& at least 0.5 in the memory domain) | Memory complaint corroborated by informant                      | Paragraph Recall Logical Memory II WMS-R (Immediate & delayed recall score)                                                                                        | 1.5-2SD (Education adjusted)   | Clinical judgement based on CDR, MMSE $\geq 24$ (ADAS-Cog also available)          | Clinical interview with patient & informant (None or minimal)                                                  | Modified HIS $\leq 4$ & HDRS $\leq 12$ | NINCDS-ADRDA criteria for AD                                                    |

1  
2  
3  
4  
5  
6  
7  
8  
9  
10  
11  
12  
13  
14  
15  
16  
17  
18  
19  
20  
21  
22  
23  
24  
25  
26  
27  
28  
29  
30  
31  
32  
33  
34  
35  
36  
37  
38  
39  
40  
41  
42  
43  
44  
45  
46  
47

| Reference (First Author, Year) | Role of Clinical Judgement                                                                                | CRD or other Global score                                                                                                                                                        | Memory Complaint                                                                              | Objective Deficit                                                                                                    | Cut-off                                                                                                                                                    | Global Cognitive Function                                                 | ADL                                                                                                                           | Other                        | Dementia Diagnostic Criteria |
|--------------------------------|-----------------------------------------------------------------------------------------------------------|----------------------------------------------------------------------------------------------------------------------------------------------------------------------------------|-----------------------------------------------------------------------------------------------|----------------------------------------------------------------------------------------------------------------------|------------------------------------------------------------------------------------------------------------------------------------------------------------|---------------------------------------------------------------------------|-------------------------------------------------------------------------------------------------------------------------------|------------------------------|------------------------------|
| Rapp 2002                      | Unknown                                                                                                   | N/A                                                                                                                                                                              | Self-report (MFQ)                                                                             | CERAD Battery (Verbal fluency, naming, constructional praxis, attention & concentration, executive function, memory) | ≤10th percentile (Scores on non-memory tests normal: >10th percentile)                                                                                     | MMSE>24                                                                   | Self-report of ADL/IADL impairment verified by an informant                                                                   | N/A                          | Self-report of a diagnosis   |
| Rozzini 2007                   | Clinical interview to determine normal general cognitive function, physical functioning & dementia status | CDR=0.5 (Memory box score 0.5 or 1)                                                                                                                                              | Memory complaint corroborated by informant                                                    | Unknown                                                                                                              | Unknown                                                                                                                                                    | Clinical judgement based on CDR=0.5 (Memory box score 0.5 or 1) & MMSE≥24 | No or minimal ADL (including IADL & BADL) determined by clinical interview with patient & informant (reference Lawton & Katz) | Geriatric Depression Scale<5 | NINCDS-ADRDA criteria for AD |
| Scherder 2005                  | Unknown                                                                                                   | N/A                                                                                                                                                                              | Subjective complaint supported by nursing assistant                                           | Memory items of the MMSE                                                                                             | Unknown                                                                                                                                                    | 12-Item MMSE (Cut-off score≥7)                                            | No decline in ADLs                                                                                                            | N/A                          | NINCDS-ADRDA criteria for AD |
| Sherwin 2011                   | Expert evaluation to determine MCI                                                                        | N/A                                                                                                                                                                              | Patient or caregiver report of memory problems                                                | Logical Memory 2 subtest (WMS-R) and/or RAVLT-Delayed recall score                                                   | 1SD (Age adjusted)                                                                                                                                         | MMSE & ADAS-Cog                                                           | Generally intact ADLs determined according to age                                                                             | CIBIC                        | NINCDS-ADRDA criteria for AD |
| Smith 2010 & de Jager 2011     | Unknown                                                                                                   | Informant completed IQ-CODE (short form), EQ-5D (Health Questionnaire) & informant CDR (subject also completed the CDR) [CDR=0.5]. Note: CDR was not used for MCI classification | Subjective concern (based on CAMDEX), that did not interfere with ADL; informant corroborated | TICS-M & CERAD Category Fluency (Animals)                                                                            | 1.5SD. More specifically: 17-29 (/39) on TICS-M, or TICS-M>29 but fluency<19 or TICS-M word recall ≤10/20, or TIC-M<17 but fluency≥19 or word recall≥10/20 | MMSE>24                                                                   | Normal ADL (5 questions relating to ADLs based on the CBI)                                                                    | Geriatric Depression Scale   | DSM-IV                       |

| Reference (First Author, Year) | Role of Clinical Judgement                                                                                       | CRD or other Global score                                                                        | Memory Complaint                                                                                                       | Objective Deficit                                                                                                   | Cut-off                                                             | Global Cognitive Function              | ADL                                                                                                                                                                                                                       | Other                                                                                  | Dementia Diagnostic Criteria                                                              |
|--------------------------------|------------------------------------------------------------------------------------------------------------------|--------------------------------------------------------------------------------------------------|------------------------------------------------------------------------------------------------------------------------|---------------------------------------------------------------------------------------------------------------------|---------------------------------------------------------------------|----------------------------------------|---------------------------------------------------------------------------------------------------------------------------------------------------------------------------------------------------------------------------|----------------------------------------------------------------------------------------|-------------------------------------------------------------------------------------------|
| Thal 2005                      | In some cases the patient was determined by an investigator to have developed dementia despite their CDR results | CDR=0.5 (With memory domain score $\geq 0.5$ ) & BDRS $\leq 3.5$ (no part 1 item score $> 0.5$ ) | Patient report of memory problem or informant report of decline (past year)                                            | AVLT total $\leq 37$                                                                                                | 1.5SD (AVLT, age-adjusted) for the first 6 months and then 1SD used | MMSE $\geq 24$                         | BDRS-CERAD. Informant based rating of patient's ability to perform ADLs (household tasks/self-care). Required to have BDRS scores $\leq 3.5$ , with no Part 1 item $> 0.5$ (these were excluded due to possible dementia) | Modified HIS $> 4$ , HDS 17-Item version $> 13$                                        | NINCDS-ADRDA criteria for AD                                                              |
| Troyer 2008                    | Clinical evaluation & consensus used to classify aMCI                                                            | N/A                                                                                              | New memory complaint (informant corroborated)                                                                          | HVLT, WMS-Revised Verbal Paired Associates, Brief Visuospatial Memory Test and Rey-Osterreith Complex Figure Recall | Age, education & intellectual function adjusted (1-1.5SD)           | MMSE & DRS-II (Age/education adjusted) | No significant impairment in daily functioning determined by interview with clinician (self & where possible informant interview)                                                                                         | BNT, Digit Span, Rey-Osterreith Complex Figure Copy, TMT B (used for descriptive only) | Consideration of all MCI criteria & hinged on having no significant functional impairment |
| Van Uffelen 2007, 2008 & 2009  | Unknown                                                                                                          | N/A                                                                                              | Strawbridge cognition scale (answer 'yes' to 'do you have memory complaints', or at least twice answering 'sometimes') | 10 Word Learning Test delayed recall scores $\leq 5$ & percentage savings score $\leq 100$                          | 1SD                                                                 | TICS $\geq 19$ & MMSE $\geq 24$        | No report of ADL disability on the GARS, except item 'taking care of hands & feet'                                                                                                                                        | N/A                                                                                    | Absence of dementia given the following cut-offs: TICS $\geq 19$ +MMSE $\geq 24$          |
| Winblad 2008                   | Unknown                                                                                                          | CDR=0.5 (CDR memory score $\geq 0.5$ )                                                           | A history of gradual onset & slow progression of declining cognitive ability                                           | New York University Paragraph Recall Test                                                                           | Delayed Recall Scores $\leq 10$                                     | CDR                                    | Insufficient impairment in ADL to meet diagnostic criteria for dementia                                                                                                                                                   | N/A                                                                                    | CDR $\geq 1$                                                                              |

**KEY (Supplementary Tables 1a and 1b)**

**A $\beta$**  Amyloid beta; **AD** Alzheimer's Disease; **ADAS-Cog** Alzheimer's Disease Assessment Scale Cognitive Subscale; **ADCS-ADL** Alzheimer's Disease Cooperative Study-Activities of Daily Living Inventory; **ADL** Activities of Daily Living; **ARA** Arachidonic acid; **AVLT** Auditory Verbal Learning Test; **BADL** Basic Activities of Daily Living; **BDNF** Brain-derived neurotrophic factor; **BDRS** Blessed Dementia Rating Scale; **BDRS-CERAD** Blessed Dementia Rating Scale-CERAD version; **BMI** Body Mass Index; **BNT** Boston Naming Test; **BP** Blood Pressure; **CAMCOG** Cambridge Cognitive Examination; **CAMDEX Cambridge Mental Disorders of the Elderly Examination**; **CANTAB Cambridge Neuropsychological Test Automated Battery**; **CBI** Cambridge Behavioural Inventory; **CDR** Clinical Dementia Rating Scale; **CDR-SB** Clinical Dementia Rating Scale Sum of Boxes; **CDT** Clock Drawing Test; **CERAD** Consortium to Establish a Registry for Alzheimer's Disease; **CGI** Clinical Global Impression; **CGIC-MCI** Clinical Global Impression of Change Scale Scores Designed for Patients with Mild Cognitive Impairment; **ChEIs** Cholinesterase Inhibitors; **CIBIC** Clinician Interview-Based Impression of Change; **CIBIC-plus** Clinician's Interview-Based Impression of Change Scale (including the care-giver supplied information); **CLOX** Clock Drawing Test (CANTAB); **CSF** Cerebral Spinal Fluid; **CVLT** California Verbal Learning Test; **CVLT-II** California Verbal Learning Test-II; **DHA** Docosahexaenoic acid; **DMS** Delayed Matching to Sample; **DRS** Dementia Rating Scale; **DRS-2** Dementia Rating Scale-2; **DSM-IV** Diagnostic and Statistical Manual of Mental Disorders, 4th Edition; **DSRS** Dementia Severity Rating Score; **DSST** Digit Symbol Substitution Test; **D-QoL** Dementia Quality of Life; **EPA** Eicosapentaenoic acid; **Euro-QoL** Euro Quality of Life; **FAQ** Functional Activities Questionnaire; **FDG-PET** Fluorine-18-Fluorodeoxyglucose Positron Emission Tomography; **GARS** Groningen Activity Restriction Scale; **GDS** Global Deterioration Scale; **GDS-15** 15-item Geriatric Depression Scale; **HAM-D** Hamilton Rating Scale for Depression; **HDRS** Hamilton Depression Rating Scale; **HIS** Hachinski Ischemia Scale; **HVLT** Hopkins Verbal Learning Test; **HVLT-R** Hopkins Verbal Learning Test Revised; **IADL** Instrumental Activities of Daily Living; **IED** Intra-Extra Dimensional Set Shift; **IGF-I** Insulin-like growth factor 1; **IQ-CODE** Informant Questionnaire on Cognitive Decline in the Elderly; **LASA** Longitudinal Aging Study Amsterdam; **M** Mean; **MADRS** Montgomery Asberg Depression Rating Scale; **MFQ** Memory Functioning Questionnaire; **MMQ** Multifactorial Memory Questionnaire; **MMSE** Mini Mental State Examination; **N/A** Not applicable; **NINCDS-ADRDA** National Institute of Neurological and Communicative Diseases and Stroke/Alzheimer's Disease and Related Disorders Association; **NINDS-AIREN** National Institute of Neurological Disorders and Stroke and Association Internationale pour la Recherche et l'Enseignement en Neurosciences; **NPI** Neuropsychiatric Inventory; **PAL** Paired Associates Learning Test; **PDQ** Perceived Deficits Questionnaire; **PGA** Patient Global Assessment; **PRM** Pattern Recognition Memory; **P-tau** Phosphorylated tau; **PUFAs** Polyunsaturated fatty acids; **RAVLT** Rey Auditory Verbal Learning Task; **RBANS** Repeatable Battery for the Assessment of Neuropsychological Status; **RBMT** Rivermead Behavioural Memory Test; **SD** Standard Deviation; **SDMT** Symbol Digit Modalities Test; **SF-12** Psychological Wellbeing Short Form 12; **SMAP** Functional Autonomy Management System; **SOC** Stockings of Cambridge; **SRM** Spatial Recognition Memory; **SRT** Selective Reminding Test; **TICS** Telephone Interview for Cognitive Status; **TICS-M** Telephone interview of cognitive status (modified); **TMT A&B** Trail Making Test (Parts A and B); **TNP** NeuroPsychological training; **QoL-AD** Quality of Life Alzheimer's Disease Scale; **WMS-III** Wechsler Memory Scale-III; **WMS-R** Wechsler Memory Scale-Revised; **WTAR** Wechsler Test of Adult Reading

**Supplementary Table 2** Tasks used to assess the MCI criteria of “objective cognitive decline” (alphabetic order)

| Task                                                                                                                                     | References Used |
|------------------------------------------------------------------------------------------------------------------------------------------|-----------------|
| <b>Brief Visuospatial Memory Test[1] (BVMT)</b>                                                                                          | [2]             |
| <b>California Verbal Learning Test 2nd Edition (CVLT-II)[3]</b>                                                                          | [4]             |
| <b>Clinical Dementia Rating (CDR)[5] Memory Box Score</b>                                                                                | [6-8]           |
| – 0.5-1                                                                                                                                  |                 |
| – ≥0.5                                                                                                                                   |                 |
| <b>Clock Drawing Test (CDT)[9]</b>                                                                                                       | [4]             |
| <b>Consortium to Establish a Registry for Alzheimer’s Disease (CERAD) neuropsychological test-battery[10]</b>                            | [11-14]         |
| – Memory (immediate and delayed)                                                                                                         |                 |
| – Verbal/category fluency                                                                                                                |                 |
| – Naming                                                                                                                                 |                 |
| – Constructional praxis                                                                                                                  |                 |
| – Attention & concentration                                                                                                              |                 |
| – Recognition                                                                                                                            |                 |
| – Executive function                                                                                                                     |                 |
| – 10 Word list test                                                                                                                      |                 |
| <b>Delayed Story Recall</b>                                                                                                              | [15]            |
| – 44 information bits to recall immediately and after 20 minutes delay                                                                   |                 |
| <b>Hopkins Verbal Learning Test Revised (Brief Visuospatial Memory Test–Revised)[16 17]</b>                                              | [2 18 19]       |
| <b>Mattis Dementia Rating Scale (DRS)</b>                                                                                                | [18]            |
| – Memory subscale[20]                                                                                                                    |                 |
| <b>Mini Mental State Examination (MMSE) 12-Item short form[21]</b>                                                                       | [22]            |
| – Memory items                                                                                                                           |                 |
| <b>Repeatable battery for assessment of neuropsychological status (RBANS)[23] [Japanese version] (see[24] for the specific subtests)</b> | [25]            |
| – Immediate and delayed memory                                                                                                           |                 |
| – Visuospatial/construction, language and attention                                                                                      |                 |
| <b>Rey Auditory Verbal Learning Test (RAVLT)[26]</b>                                                                                     | [8 19 27]       |
| <b>Rey-Osterreith Complex Figure Recall[28]</b>                                                                                          | [2]             |
| <b>Semantic and Phonemic Verbal Fluency</b>                                                                                              | [4]             |
| – Animal naming[9]                                                                                                                       |                 |
| <b>Trail Making Test (TMT) of the Delis-Kaplan Executive Function System (D-KEFS)[29]</b>                                                | [4]             |
| <b>Wechsler Memory Scale-Revised (WMS-R)[30]</b>                                                                                         | [2 27]          |
| – Logical Memory II Subtest                                                                                                              |                 |
| – Verbal Paired Associates                                                                                                               |                 |
| <b>Wechsler Memory Scale–III[31]</b>                                                                                                     | [6 18 19 32 33] |
| – Logical Prose Passages                                                                                                                 |                 |
| – Word List Learning                                                                                                                     |                 |
| – Verbal Paired Associates                                                                                                               |                 |
| – Logical Memory (II) Immediate recall and delayed paragraph recall                                                                      |                 |
| <b>New York University (NYU) Paragraph recall test</b>                                                                                   | [7]             |
| – Delayed recall score                                                                                                                   |                 |
| <b>Telephone interview of cognitive status-modified (TICS-M)[34]</b>                                                                     | [13]            |

## Table References

1. Benedict RHB. *Brief Visuospatial Memory Test - Revised* Lutz, FL: Psychological Assessment Resources, 1997.
2. Troyer AK, Murphy KJ, Anderson ND, et al. Changing everyday memory behaviour in amnesic mild cognitive impairment: A randomised controlled trial. *Neuropsychological Rehabilitation* 2008;**18**(1):65-88
3. Delis D, Kramer J, Kaplan E, et al. *California Verbal Learning Test: Adult version manual*. San Antonio, TX: The Psychological Corporation, 1987.
4. Jean L, Simard M, Wiederkehr S, et al. Efficacy of a cognitive training programme for mild cognitive impairment: Results of a randomised controlled study. *Neuropsychological Rehabilitation* 2010;**20**(3):377-405
5. Hughes CP, Berg L, Danziger WL, et al. A new clinical scale for the staging of dementia. *Br J Psychiatry* 1982;**140**:566-72
6. Doody RS, Ferris SH, Salloway S, et al. Donepezil treatment of patients with MCI: A 48-week randomized, placebo-controlled trial. *Neurology* 2009;**72**(18):1555-61
7. Winblad B, Gauthier S, Scinto L, et al. Safety and efficacy of galantamine in subjects with mild cognitive impairment. *Neurology* 2008;**70**(22):2024-35
8. Thal LJ, Ferris SH, Kirby L, et al. A randomized, double-blind, study of rofecoxib in patients with mild cognitive impairment. *Neuropsychopharmacology* 2005;**30**(6):1204-15
9. Strauss E, Sherman EMS, Spreen O. *A Compendium of Neuropsychological Tests: Administration, Norms, and Commentary*. New York, NY: Oxford University Press, 2006.
10. Morris JC, Heyman A, Mohs RC, et al. The Consortium to Establish a Registry for Alzheimer's Disease (CERAD). Part I. Clinical and neuropsychological assessment of Alzheimer's disease. *Neurology* 1989;**39**(9):1159-65
11. Buschert VC, Friese U, Teipel SJ, et al. Effects of a newly developed cognitive intervention in amnesic mild cognitive impairment and mild Alzheimer's disease: a pilot study. *J Alzheimers Dis* 2011;**25**(4):679-94
12. Rapp S, Brenes G, Marsh AP. Memory enhancement training for older adults with mild cognitive impairment: A preliminary study. *Aging and Mental Health* 2002;**6**(1):5-11
13. Smith AD, Smith SM, de Jager CA, et al. Homocysteine-lowering by b vitamins slows the rate of accelerated brain atrophy in mild cognitive impairment: A randomized controlled trial. *PLoS ONE* 2010;**5**(9):1-10
14. Van Uffelen JGZ, Hopman-Rock M, Chin A Paw MJM, et al. Protocol for Project FACT: A randomised controlled trial on the effect of a walking program and vitamin B supplementation on the rate of cognitive decline and psychosocial wellbeing in older adults with mild cognitive impairment [ISRCTN19227688]. *BMC Geriatrics* 2005;**5**(18):doi:10.1186/471-2318-5-18
15. Craft S, Baker LD, Montine TJ, et al. Intranasal insulin therapy for Alzheimer disease and amnesic mild cognitive impairment: a pilot clinical trial. *Arch Neurol* 2012;**69**(1):29-38
16. Benedict RHB, Schretlen D, Groninger L, et al. Hopkins Verbal Learning Test Revised: Normative Data and Analysis of Inter-Form and Test-Retest Reliability. *The Clinical Neuropsychologist (Neuropsychology, Development and Cognition: Sec* 1998;**12**(1):43-55
17. Brandt J, Benedict RHB. *Hopkins verbal learning test—revised*. Lutz: Psychological Assessment Resources, 2001.
18. Chen X, Magnotta VA, Duff K, et al. Donepezil effects on cerebral blood flow in older adults with mild cognitive deficits. *J Neuropsychiatry Clin Neurosci* 2006;**18**(2):178-85
19. Kinsella GJ, Mullaly E, Rand E, et al. Early intervention for mild cognitive impairment: a randomised controlled trial. *Journal of Neurology, Neurosurgery & Psychiatry* 2009;**80**(7):730-36
20. Lucas JA, Ivnik RJ, Smith GE, et al. Normative data for the Mattis Dementia Rating Scale. *J Clin Exp Neuropsychol* 1998;**20**(4):536-47



- 1
- 2
- 3
- 4 21. Braekhus A, Laake K, Engedal K. The Mini-Mental State Examination: identifying the most
- 5 efficient variables for detecting cognitive impairment in the elderly. *J Am Geriatr Soc*
- 6 1992;**40**(11):1139-45
- 7
- 8 22. Scherder EJ, Van Paasschen J, Deijen JB, et al. Physical activity and executive functions in the
- 9 elderly with mild cognitive impairment. *Aging Ment Health* 2005;**9**(3):272-80
- 10
- 11 23. Randolph C. *Repeatable Battery for the Assessment of Neuropsychological Status (RBANS)*. San
- 12 Antonio: Harcourt, TX: The Psychological Corporation, 1998.
- 13
- 14 24. Randolph C, Tierney MC, Mohr E, et al. The Repeatable Battery for the Assessment of
- 15 Neuropsychological Status (RBANS): preliminary clinical validity. *J Clin Exp Neuropsychol*
- 16 1998;**20**(3):310-9
- 17
- 18 25. Kotani S, Sakaguchi E, Warashina S, et al. Dietary supplementation of arachidonic and
- 19 docosahexaenoic acids improves cognitive dysfunction. *Neurosci Res* 2006;**56**(2):159-64
- 20
- 21 26. Schmidt M. *Rey Auditory and verbal learning test: a handbook*. Los Angeles: Western
- 22 Psychological Services, 1996.
- 23
- 24 27. Sherwin BB, Chertkow H, Schipper H, et al. A randomized controlled trial of estrogen treatment
- 25 in men with mild cognitive impairment. *Neurobiol Aging* 2011;**32**(10):1808-17
- 26
- 27 28. Spreen O, Strauss EA. *Compendium of neuropsychological tests. Administration, norms and*
- 28 *commentary (2nd ed.)*. New York: Oxford University Press, 1998.
- 29
- 30 29. Delis DC, Kaplan E, Kramer JH. *The Delis-Kaplan Executive Function System*. San Antonio, TX: The
- 31 Psychological Corporation, 2001.
- 32
- 33 30. Wechsler D. *Wechsler Memory Scale-Revised*. San Antonio, TX: The Psychological Corporation,
- 34 1987.
- 35
- 36 31. Wechsler D. *Wechsler Memory Scale-III*. San Antonio, TX: Psychological Corp, 1997.
- 37
- 38 32. Chiu CC, Su KP, Cheng TC, et al. The effects of omega-3 fatty acids monotherapy in Alzheimer's
- 39 disease and mild cognitive impairment: a preliminary randomized double-blind placebo-
- 40 controlled study. *Prog Neuropsychopharmacol Biol Psychiatry* 2008;**32**(6):1538-44
- 41
- 42 33. Petersen RC, Thomas RG, Grundman M, et al. Vitamin E and donepezil for the treatment of mild
- 43 cognitive impairment. *N Engl J Med* 2005;**352**(23):2379-88
- 44
- 45 34. de Jager CA, Budge MM, Clarke R. Utility of TICS-M for the assessment of cognitive function in
- 46 older adults. *Int J Geriatr Psychiatry* 2003;**18**(4):318-24
- 47
- 48
- 49
- 50
- 51
- 52
- 53
- 54
- 55
- 56
- 57
- 58
- 59
- 60
